# Supplementary material for: Impoverishment and catastrophic expenditures due to out-of-pocket payments for antenatal and delivery care in Yangon Region, Myanmar: a cross-sectional study
Source: PubMed Central journal article supplement — BMJ Open. 2018 Nov 25;8(11):e022380. doi: 10.1136/bmjopen-2018-022380 (PMC6254407; doi:10.1136/bmjopen-2018-022380), 2018-11-25
Supplement: bmjopen-2018-022380.draft_revisions.pdf [file bmjopen-2018-022380.draft_revisions.pdf]

# BMJ Open

BMJ Open is committed to open peer review. As part of this commitment we make the peer review history of every article we publish publicly available.

When an article is published we post the peer reviewers' comments and the authors' responses online. We also post the versions of the paper that were used during peer review. These are the versions that the peer review comments apply to.

The versions of the paper that follow are the versions that were submitted during the peer review process. They are not the versions of record or the final published versions. They should not be cited or distributed as the published version of this manuscript.

BMJ Open is an open access journal and the full, final, typeset and author-corrected version of record of the manuscript is available on our site with no access controls, subscription charges or pay-per-view fees (<http://bmjopen.bmj.com>).

If you have any questions on BMJ Open's open peer review process please email [info.bmjopen@bmj.com](mailto:info.bmjopen@bmj.com)

# BMJ Open

## Levels of impoverishment and catastrophic out-of-pocket payment for antenatal and delivery care and their determinants in Yangon region, Myanmar: a cross-sectional study

|                               |                                                                                                                                                                                                                                                                                                                                                                                                                                                                                                                                                              |
|-------------------------------|--------------------------------------------------------------------------------------------------------------------------------------------------------------------------------------------------------------------------------------------------------------------------------------------------------------------------------------------------------------------------------------------------------------------------------------------------------------------------------------------------------------------------------------------------------------|
| Journal:                      | <i>BMJ Open</i>                                                                                                                                                                                                                                                                                                                                                                                                                                                                                                                                              |
| Manuscript ID                 | bmjopen-2018-022380                                                                                                                                                                                                                                                                                                                                                                                                                                                                                                                                          |
| Article Type:                 | Research                                                                                                                                                                                                                                                                                                                                                                                                                                                                                                                                                     |
| Date Submitted by the Author: | 15-Feb-2018                                                                                                                                                                                                                                                                                                                                                                                                                                                                                                                                                  |
| Complete List of Authors:     | Moe Myint, Aye Nyein; Ministry of Health and Sports, International Relations Division<br>Liabsuetrakul, Tippawan; Prince of Songkla University, Epidemiology Unit, Faculty of Medicine<br>Htay, Thein Thein; Seisa University, Visiting Professor<br>Wai, Myint Myint; Ministry of Health and Sports, Department of Medical Services (Planning)<br>Sundby, Johanne; University of Oslo, Department of Community and Global Health<br>Bjertness, Espen; University of Oslo, Section for Preventive Medicine and Epidemiology, Institute of Health and Society |
| Keywords:                     | Health policy < HEALTH SERVICES ADMINISTRATION & MANAGEMENT, Public health < INFECTIOUS DISEASES, PRIMARY CARE, Health economics < HEALTH SERVICES ADMINISTRATION & MANAGEMENT                                                                                                                                                                                                                                                                                                                                                                               |
|                               |                                                                                                                                                                                                                                                                                                                                                                                                                                                                                                                                                              |

SCHOLARONE™  
Manuscripts

1  
2  
3 **Levels of impoverishment and catastrophic out-of-pocket payment for antenatal and**  
4  
5 **delivery care and their determinants in Yangon region, Myanmar: a cross-sectional study**  
6

7 Aye Nyein Moe Myint, M.B., B.S, MPH, MA (Pop & RH)<sup>1</sup>, Tippawan Liabsuetrakul, MD,  
8 PhD<sup>2\*</sup>, Thein Thein Htay, M.B., B.S, M.Med.Sc (PH), MHS (Pop & RH)<sup>3</sup>, Myint Myint Wai,  
9 M.B., B.S, M.Med.Sc (PH)<sup>4</sup>, Johanne Sundby, MD, PhD<sup>5</sup>, Espen Bjertness, PhD<sup>6</sup>  
10

11 <sup>1</sup>International Relations Division, Ministry of Health and Sports, Nay Pyi Taw, Myanmar

12 Email: [anmoemyint@gmail.com](mailto:anmoemyint@gmail.com)

13 <sup>2</sup>Epidemiology Unit, Faculty of Medicine, Prince of Songkla University, Hat Yai, Songkhla,  
14 Thailand

15 <sup>3</sup>Visiting Professor, Seisa University, Ashigarashimo District, Kanagawa, Japan

16 Email: [htaythein90@gmail.com](mailto:htaythein90@gmail.com)

17 <sup>4</sup>Department of Medical Services (Planning), Ministry of Health and Sports, Nay Pyi Taw,  
18 Myanmar, Email: [m.m.wai@studmed.uio.no](mailto:m.m.wai@studmed.uio.no)

19 <sup>5</sup>Department of Community and Global Health, University of Oslo, Norway

20 Email: [johanne.sundby@medisin.uio.no](mailto:johanne.sundby@medisin.uio.no)

21 <sup>6</sup>Department of Community and Global Health, University of Oslo, Norway

22 Email: [espen.bjertness@medisin.uio.no](mailto:espen.bjertness@medisin.uio.no)

23  
24  
25  
26  
27  
28  
29  
30  
31  
32  
33  
34  
35 \*Correspondence: Tippawan Liabsuetrakul

36 Epidemiology Unit, Faculty of Medicine

37 Prince of Songkla University

38 Hat Yai, Songkhla, 90110, Thailand

39 Tel: +66 74 451165 Fax: +66 74 429754

40 E-mail: [ltippawa@yahoo.com](mailto:ltippawa@yahoo.com)

41 Word count: 3022

42 Number of tables: 5

43 Number of figures: 1

**Abstract (285 words)**

**Objectives:** To assess the levels of impoverishment and catastrophic out-of-pocket (OOP) payments for antenatal and delivery care in Yangon Region, Myanmar and explore the determinants of impoverishment and catastrophic OOP payment.

**Design, setting and participants:** A community-based cross-sectional survey among women giving birth within the past 12 months was conducted during October-November 2016 using multistage sampling in Myanmar.

**Outcome measures:** Impact of poverty headcount and normalized poverty gap were used to assess impoverishment with a poverty threshold of 1.9 USD. Out-of-pocket payment exceeding 10% of household annual income were used to assess catastrophic payment measuring incidence, intensity and mean positive gap. A multiple logistic regression using survey package was applied to estimate odds ratios (OR) and 95% confidence interval of determinants of impoverishment and catastrophic OOP payments in the utilization of antenatal and delivery care.

**Results:** Of 759 included women, out-of-pocket payments were used by 75% of the women for ANC and by 99.6% for delivery care. The impact of overall poverty headcount for antenatal and delivery care were 7.9 % which was 5.6% for ANC and 1.4% for delivery care. Overall incidence of catastrophic OOP payment was 22.6% which was 14% for ANC and 9.5% for delivery care. Women's occupation, accessibility of health services and utilization of health personnel and health facilities were important determinants for impoverishment and catastrophic OOP payments for maternal health care.

**Conclusions:** Out-of-pocket payment for all antenatal and delivery care in Myanmar is a challenge as one-tenth of women become impoverished and one-fourth face catastrophe after utilization of antenatal and delivery care. Social determinants are important factors that require

1  
2  
3 policy integration to reduce the financial burden on these women and support the achievement of  
4  
5 universal health coverage in the country.  
6

7 **Key words:** impoverishment, catastrophic payments, out-of-pocket payment, antenatal care,  
8  
9 delivery care  
10  
11  
12  
13  
14  
15  
16  
17  
18  
19  
20  
21  
22  
23  
24  
25  
26  
27  
28  
29  
30  
31  
32  
33  
34  
35  
36  
37  
38  
39  
40  
41  
42  
43  
44  
45  
46  
47  
48  
49  
50  
51  
52  
53  
54  
55  
56  
57  
58  
59  
60

For peer review only

### Strengths and limitations of this study

- This study measured the level of impoverishment and catastrophic OOP payment for antenatal and delivery care and their determinants in Myanmar where is low-income country.
- Techniques of multistage sampling and survey package of analysis were used to minimize the standard errors.
- Expenditures of antenatal and delivery care were collected in terms of societal perspective.
- Recall bias might be occurred due to retrospective interview was carried out.
- Self-reported household annual income and payments for healthcare services may be slightly over- or under-reported.

## Introduction

Worldwide, nearly 830 women die from pregnancy and childbirth every day, with most of them living in poor households having limited proper maternal health care.<sup>1</sup> Increasing utilization of maternal health services is one of the targets of Sustainable Development Goal 3.<sup>2</sup> Poverty or financial problems are the major barrier to accessibility and utilization of antenatal care (ANC) and delivery by skilled birth attendants (SBAs).<sup>3</sup> Even though the economic indicators of most countries were improved from earlier years in 2015, there are still some countries which face financial barriers leading to worse health outcomes.<sup>2</sup>

Low socioeconomic level or high health care expenditures can lead to financial burdens either impoverishment or catastrophe.<sup>4,5</sup> Household Impoverishment is defined as ‘non-poor household is impoverished by health care payment when it became poor after health care payment’.<sup>6</sup> ‘Catastrophic health care expenditure’ is defined as ‘out-of-pocket (OOP) payment for health care that exceeds some estimated proportion of household income or a household’s capacity to pay’.<sup>7</sup> These financial burdens from utilization of maternal health care have been previously reported in some African and Asian countries such as Ghana, Nepal, Bangladesh, and India.<sup>8-10</sup> In Myanmar, OOP payment for health services were high in public and private health facilities which was about more than 80 % for total health spending in 2012.<sup>11</sup> There were limited evidences about OOP payment and relating factors of impoverishment and catastrophic OOP payments of maternal health services in Myanmar.<sup>12</sup>

Different countries have introduced different strategies to reduce the financial burdens while accessing necessary health care during pregnancy, child birth and postpartum period.<sup>13</sup> Providing free maternal health services has been implemented in some low-income countries, but various studies have found low utilization of these services as well as high

1  
2  
3 maternal mortality and morbidity.<sup>10 14 15</sup> A study in Thailand found improvement of maternal  
4 health outcomes five years after the implementation of a universal coverage scheme with health  
5 finance reform.<sup>16</sup> Although some countries have begun to offer free health services or health  
6 insurance, the achievement for reducing financial burdens remains limited.<sup>13</sup>  
7  
8  
9  
10  
11

12 Similarly, Myanmar has begun a free program for maternal health services in recent  
13 years, but OOP payment of these services has been reported.<sup>11 17 18</sup> In addition, reports on the  
14 actual financial burden in terms of impoverishment and catastrophic OOP payments are  
15 limited.<sup>12</sup> Understanding the determinants of financial burden in utilizing maternal health  
16 services is useful to identify the nature of the OOP payment situation and whether any  
17 determinants are modifiable or require policy improvement.<sup>15 19 20</sup> This study aimed to 1) assess  
18 the levels of impoverishment and catastrophic OOP payments for antenatal and delivery care,  
19 and 2) explore the determinants of impoverishment and catastrophic OOP payment in Yangon  
20 Region, Myanmar.  
21  
22  
23  
24  
25  
26  
27  
28  
29  
30  
31  
32  
33  
34  
35  
36  
37  
38  
39  
40  
41  
42  
43  
44  
45  
46  
47  
48  
49  
50  
51  
52  
53  
54  
55  
56  
57  
58  
59  
60



## Methods

### Study design and participants

This was a community-based cross-sectional survey conducted in 15 townships of Yangon Region of Myanmar during October and November 2016. According to the 2014 census report, Yangon region had the largest population among the 4 regions of Myanmar.<sup>21</sup> Only the south and north districts were chosen as the study area because these areas have both urban and rural populations. A two-stage stratified sampling technique was used to identify the study subjects. For the first stage, urban and rural populations from the south (urban - 110 wards, rural - 375 villages) and north (urban - 125 wards, rural - 235 villages) districts were estimated using proportional probability sampling (PPS). For the second stage, 16 wards and 16 villages were randomly selected from the overall 15 townships of the south and north districts.

The study recruited women of reproductive age (15-49 years) with a history of prior birth within the previous 12 months who were residents of the study area. Those who had mentally retardation or serious illness were excluded. The required sample size for the first objective was calculated using the one-proportion formula based on a rate of 9% of pregnant women with catastrophic OOP payments on utilization of delivery care from a previous study.<sup>12,22</sup> With a precision of 3%, type I error of 5%, and design effect of 2, at least 700 women were required. The households in the selected wards and villages were visited by a survey team, and the eligible woman were approached. For households with more than one eligible woman, one woman was selected randomly.

### Variables

Impoverishment and catastrophic out-of-pocket payment for overall antenatal and delivery care were the two main outcome variables in this study. The OOP payments included all related

1  
2  
3 healthcare services received during antenatal and delivery care, namely hospital  
4 costs/investigation fees, drugs, consultation fees, food/living/transportation cost, productivity  
5 loss and other costs. The OOP payments were calculated for antenatal care and delivery care and  
6 then summed as total OOP payment for care. OOP payments for ANC were counted as the sum  
7 of all ANC visits but delivery care was counted at one time. Impoverishment was defined as a  
8 household which was forced below the poverty line (counted as 1.9 US dollars (USD) per day)  
9 after paying for maternal health care services.<sup>6</sup> Catastrophic payment was defined as payment for  
10 maternal health care services exceeding 10% of a household's annual income.<sup>23</sup>

11  
12  
13  
14  
15  
16  
17  
18  
19  
20  
21  
22  
23  
24  
25  
26  
27  
28  
29  
30  
31  
32  
33  
34  
35  
36  
37  
38  
39  
40  
41  
42  
43  
44  
45  
46  
47  
48  
49  
50  
51  
52  
53  
54  
55  
56  
57  
58  
59  
60

Independent variables included background characteristics of women, their husband and household information, accessibility of health services and details of services provided. Household annual income and income of all household members, was recorded in Myanmar kyats and converted to US\$ using the exchange rate of 1 USD equal to 1362.63 kyats. The information pertaining to accessibility to health services included availability of a health center, distance as measured in walking minutes (number of walking minutes from the woman's house to a formal health center) and types of transportation (women who used any transport to visit a health center). Details of services provided included health personnel, place of care, affordability, and OOP payment.

### **Data collection**

Before the data collection began, 12 research assistants were trained in a two-day training workshop on how to conduct the interview and check information for completeness of data. The required list of women was obtained from the township health departments and local authorities. The eligible women were visited at their house by the research team at their convenience. After the study was explained and a consent form signed, the women were interviewed by the principal

investigator and researchers using a pre-tested structured questionnaire in a private area. Each completed interview was checked promptly and daily for any errors and edited if required.

### Statistical analysis

After data collection was complete, EpiData 3.1 was used to record the data on a double entry system and validate it, and R version 3.4.2 was used in data analysis.<sup>24 25</sup> Categorical variables are presented by frequencies and percentages and continuous variables are shown in median with interquartile range.

The impoverishment was presented by the poverty headcount and normalized poverty gap in terms of poverty impact.<sup>26 27</sup> The poverty impact of the poverty headcount was calculated by subtracting pre-payment head count from post-payment head count. Similarly, the poverty impact of the normalized poverty gap was calculated by subtracting pre-payment normalized poverty gap from post-payment normalized poverty gap.<sup>26</sup> Poverty head count was defined as the proportion of households who had pre- or post-payment household annual income less than the defined poverty line. Normalized poverty gap was defined as the poverty gap divided by the poverty line. The poverty gap was calculated by the depth of payment below the poverty line. A Lorenz curve graph between household income as a multiple of the poverty line (y axis) with cumulative proportion of the population ranked by household income (x axis) was plotted to show the number of non-poor households which became poor after OOP for pregnancy expenses as indicated by the vertical lines below the poverty line.

The incidence, intensity and mean positive gap of catastrophe were analyzed for catastrophic OOP payment.<sup>23 27</sup> Incidence was calculated by antenatal and delivery OOP payment of a household greater than the 10% threshold. Intensity was calculated by antenatal

1  
2  
3 and delivery OOP payments divided by household annual income above the 10% threshold. The  
4  
5 mean positive gap was calculated as intensity divided by incidence.<sup>23 27</sup>  
6  
7

8         The determinants of impoverishment and catastrophic OOP payment were analyzed using  
9  
10 multiple logistic regression with the survey package to consider the sampling weight in cluster  
11  
12 design. According to this analysis, the first stage sampling weight was calculated by the total  
13  
14 number of wards and villages divided by the selected number of wards and villages by each  
15  
16 district and the second stage sampling weight was calculated by the total number of women  
17  
18 divided by the selected number of women in each ward and village by each township. The final  
19  
20 stage weight was calculated by multiplying the first stage and second stage sampling weights.<sup>28</sup>  
21  
22 The adjusted Odd Ratios (OR) and 95% confidence interval were presented in the final models  
23  
24 with the significance value less than 0.05.  
25  
26  
27  
28  
29  
30  
31  
32  
33  
34  
35  
36  
37  
38  
39  
40  
41  
42  
43  
44  
45  
46  
47  
48  
49  
50  
51  
52  
53  
54  
55  
56  
57  
58  
59  
60

## Results

A total of 759 women were included in this study. Half of the women were aged 24- 35 years and 71% were housewives. More than two-thirds of their husbands had above primary school level education and 60% of them worked as a daily wage-earner. Most of the households in this study had less than five household members and 89% of them had annual household income above 1275 US dollars (USD), and 60.3% of the households had debt. More than 80% of the women said that a health center was available for them to get ANC services within 30 minutes walking distance (Table 1).

Table 2 shows the details of services provided and payment of the women for ANC and delivery care. More than half (56.4%) went to a community health personnel for antenatal care followed by specialists (22.5%) and doctors/ nurses (21.1%). Similar numbers had delivery by a community health personnel (35.4%) or doctors/nurses (35.2%), with the rest by specialists (29.4%). Most of the women used public facilities for antenatal care (78%) and delivery care (65%). Almost all women said that they could afford the cost of each ANC visit and half could afford the cost of delivery care. Out-of-pocket payments were made by 75% of the women for ANC and by 99.6% for delivery care. Hospital costs/ investigation fees were highest for antenatal and delivery care. Cost per each ANC visit was lower, but the total cost for all ANC visits was higher, than the total cost of delivery care.

Table 3 shows the level of impoverishment created by out-of-pocket payments for antenatal and delivery care. The impact on poverty headcount after payment for overall antenatal and delivery care was 7.9% of which 5.6% was for antenatal care and 1.4% for delivery care. The impact of the normalized poverty gap was quite similar for antenatal care (1.3%) and for overall antenatal and delivery care (1.4%). Individual pre-payment and post-payment income for OOP of overall antenatal and delivery care is shown in a Pen's parade graph (Fig 1). Overall

1  
2  
3 OOP payments for antenatal and delivery care lead to some extent of poverty regardless of  
4  
5 household income level.  
6

7  
8 Table 4 presents the catastrophic OOP payments for antenatal and delivery care at  
9  
10 different threshold levels. The incidence of catastrophic OOP payments for overall antenatal and  
11  
12 delivery care at the 10% threshold level was 22.6%, and accounted for 14% of ANC and 9.5% of  
13  
14 delivery care. The intensity and mean positive gap of catastrophic OOP expense for overall  
15  
16 antenatal and delivery care at the 10% threshold level were 11.2% and 49.6%, respectively.  
17  
18 Similar patterns of catastrophic OOP burden were found at the 20%, 30% and 40% threshold  
19  
20 levels.  
21  
22

23  
24 The determinants of impoverishment and catastrophic out-of-pocket payment with 10%  
25  
26 thresholds for overall antenatal and delivery care are shown in Table 5. Occupation of women,  
27  
28 number of household members, different health personnel providing delivery services and place  
29  
30 of antenatal care received were the significant determinants of both impoverishment and  
31  
32 catastrophic OOP for overall antenatal and delivery care. Availability of a health center nearby  
33  
34 and using delivery services from private facilities were significant determinants of  
35  
36 impoverishment, but not catastrophic OOP.  
37  
38  
39  
40  
41  
42  
43  
44  
45  
46  
47  
48  
49  
50  
51  
52  
53  
54  
55  
56  
57  
58  
59  
60

## Discussion

More than three-fourths of the study women had to pay ANC and delivery care. Approximately one in ten women accessing ANC and one-fourth of women's deliveries faced impoverishment or catastrophic OOP payments to meet their pregnancy-related expenses. Women having a higher number of household members or who were forced to access special or private services were more likely to face impoverishment and catastrophic OOP payments.

In our study, even though free maternal healthcare services are nationally available, at least three-fourths of women were forced to make OOP payments, which was not changed from a previous study in Myanmar in 2015.<sup>12</sup> This finding was also similar to previous studies from India in 2004<sup>19</sup> and Nigeria in 2010<sup>14</sup>, even though the maternal health services considered and the methods of OOP measurement were different. A possible explanation might be due to the fact that there were high informal payments when health facilities were in short supply with no health insurance system.<sup>11 12 14 19</sup> The need to turn to OOP payments has been shown to influence the utilization of maternal health services and maternal mortality.<sup>29</sup> Importantly, another study reported that high OOP payments for maternal healthcare also lead households to impoverishment and catastrophic OOP payments.<sup>4</sup>

Impoverishment as measured by the impact of poverty headcount for antenatal and delivery care in our study was half of what studies from India and Uganda, which used the lower threshold of the poverty lines in those countries, found.<sup>30 31</sup> Even though Yangon region is the most developed region among the states and region of Myanmar, a lot of non-poor households face impoverishment and deep poverty which may be due to high maternal healthcare payments without a compensation scheme.<sup>11 21</sup> A similar explanation was suggested in the studies from India and Uganda, that even rich households suffered financial burdens or poverty and poor households became extremely poor or they could not use proper maternal health services at all

1  
2  
3 because of the high costs and limited affordability.<sup>30 31</sup> Evidence from other studies from  
4 Thailand, Ghana, Kenya and Egypt showed that the impact of the poverty headcount for  
5 healthcare expenditures when free services or a health insurance scheme was available was lower  
6 than in our study.<sup>32-35</sup>  
7  
8  
9  
10  
11

12 One fourth of women faced catastrophic OOP expenses even when they used the  
13 maternal healthcare services, which was higher than an earlier study from Myanmar in 2015.  
14 This may be because the previous study measured catastrophic OOP payments only for delivery  
15 care, not antenatal care, and also they measured only direct and indirect medical costs, not other  
16 costs or productivity loss.<sup>12</sup> Higher catastrophic OOP expenses were reported in India because of  
17 poor and all antenatal, delivery and postnatal care services were measured.<sup>30</sup> In addition to  
18 services and methods measured, the definition of catastrophic measurement was also important  
19 for either household income or capacity to pay as well as the different thresholds for  
20 calculation.<sup>12 19</sup>  
21  
22  
23  
24  
25  
26  
27  
28  
29  
30  
31  
32

33 Woman's occupation, number of household members, availability of health center,  
34 utilization of health personnel and place of care were associated with impoverishment and  
35 catastrophic OOP. A previous study could not identify a direct association between occupation to  
36 impoverishment and catastrophic OOP payments. The significance association between women's  
37 occupation and impoverishment and catastrophic OOP payments found in our study could be  
38 explained by not earning money for housewives and cannot share their income. The effect of a  
39 larger number of household members on impoverishment and catastrophic OOP varied from  
40 decreasing to increasing in previous studies conducted in India, Kenya, China and Egypt.<sup>20 36 37</sup>  
41  
42  
43  
44  
45  
46  
47  
48  
49  
50  
51  
52 <sup>34 35</sup> Women who used a nearby health center or facilities having specialists and private facilities  
53  
54  
55  
56  
57  
58  
59  
60



1  
2  
3 for antenatal and delivery care where the health insurance was not available were more likely to  
4  
5 have impoverishment and catastrophic OOP payment.<sup>15 19 20</sup>  
6

7  
8 There are few studies on the level of impoverishment and catastrophic OOP payment for  
9  
10 antenatal and delivery care and their determinants in Myanmar.<sup>12</sup> The findings of this study  
11  
12 provide important information on these factors for policy makers to help them consider financial  
13  
14 burdens when strategies for increasing service utilization without health financing hardship are  
15  
16 implemented. The study had some limitations. First, this was a cross sectional study, thus the  
17  
18 causal relationship between the determinants and level of impoverishment and catastrophic OOP  
19  
20 for antenatal and delivery care could not be firmly identified. Second, household annual income  
21  
22 and payments for healthcare services were self-reported, therefore, there may have been over- or  
23  
24 under-reporting. However, we included only women within 12 months of delivery to minimize  
25  
26 the recall bias. Third, the payment of total antenatal care used the payment of last antenatal care  
27  
28 visit and then multiplied by the total number of all visits. Finally, the study was conducted in  
29  
30 Myanmar, thus the findings of OOP payment and impoverishment of antenatal and delivery may  
31  
32 not be generalized to women in other countries.  
33  
34  
35  
36

### 37 **Conclusion**

38  
39 High OOP payments for using antenatal and delivery care in Yangon region of Myanmar  
40  
41 resulted in one-tenth of women become impoverished and one-fourth face catastrophe. Women  
42  
43 with no income or those who accessed health facilities with high levels of services provided were  
44  
45 more likely to be impoverished or face catastrophic expenses.  
46  
47  
48  
49  
50  
51  
52  
53  
54  
55  
56  
57  
58  
59  
60

## Acknowledgements

This study was a part of the thesis of the first author to fulfill the requirement of a doctoral degree in Epidemiology at Prince of Songkla University. We would like to thank the Regional Department of Yangon for their permission and support in supplying lists of women.

## Contributors

All authors contributed to the concept and design of the study. ANMM and TL participated in data collection, data analysis, interpretation of the data, and preparation of the draft manuscript. TTH, MMW, JS and EB also assisted with interpretation of the data and commented on the draft MS. All authors read and approved the final manuscript.

## Competing interests

The authors declare no competing interests.

## Funding

The study was supported by the Norwegian Programme for Capacity Development in Higher Education and Research for Development (NORHED) through the project entitled “Health and Sustainable Development in Myanmar – Competence Building in Public Health (MY-NORTH)”.

## Ethical approval

Ethical clearances for the study were obtained from the Ethical Review Committee of Prince of Songkla University, Thailand, the Department of Medical Research, Myanmar and the Norwegian National Research Ethics Committee (NSD), Norway.

## References

1. WHO. Maternal mortality Fact sheet. Geneva: World Health Organization, 2016.
2. WHO. Health in 2015: from MDGs, Millennium Development Goals to SDGs, Sustainable Development Goals. Geneva: World Health Organization 2015.
3. UNICEF. Monitoring and situation of child and women. New York: United Nations International Children's Emergency Fund, 2015.
4. Saksena P, Hsu J, Evans DB. Financial risk protection and universal health coverage: evidence and measurement challenges. *PLoS Med* 2014;11(9):e1001701. doi: 10.1371/journal.pmed.1001701
5. WHO, Bank W. Tracking universal health coverage. Geneva: World Health Organization, 2015.
6. WHO. Distribution of health payments and catastrophic expenditures Methodology. Geneva: World Health Organization, 2005.
7. Pal R. Measuring incidence of catastrophic out-of-pocket health expenditure: with application to India. *Int J Health Care Finance Econ* 2012;12(1):63-85. doi: 10.1007/s10754-012-9103-4
8. Bank AD. Impact of Maternal and Child Health Private Expenditure on Poverty and Inequity. Sri Lanka: ADB, 2012.
9. Skordis-Worrall J, Pace N, Bapat U, et al. Maternal and neonatal health expenditure in Mumbai slums (India): A cross sectional study. *BMC Public Health* 2011;11(150)
10. Dalaba MA, Akweongo P, Aborigo RA, et al. Cost to households in treating maternal complications in northern Ghana: a cross sectional study. *BMC health Serv Res* 2015;15:34. doi: 10.1186/s12913-014-0659-1
11. World Bank. Myanmar: Public Expenditure Review. Washington D.C: World Bank, 2015.

- 1  
2  
3 12. Han WW, Saw S, Einda HMT, et al. Out of pocket expenditure on maternal and child health  
4 care services among rural households in Dedaye Township, Myanmar. *Myanmar Med J*  
5  
6 2017;59(2)  
7  
8  
9  
10 13. Borghi J, Ensor T, Somanathan A, et al. Mobilising financial resources for maternal health.  
11  
12 *The Lancet* 2006;368(9545):1457-65. doi: 10.1016/s0140-6736(06)69383-5  
13  
14 14. Kalu-Umeh NN, Sambo MN, Idris SH, et al. Costs and Patterns of Financing Maternal  
15 Health Care Services in Rural Communities in Northern Nigeria: Evidence for Designing  
16 National Fee Exemption Policy. *Int J MCH AIDS* 2013;2(1):163-72.  
17  
18  
19 15. Goli S, Moradkhaj, Rammohan A, et al. High Spending on Maternity Care in India: What  
20 Are the Factors Explaining It? *PloS one* 2016;11(6) doi: 10.1371/journal10.1371/  
21 journal.pone.0156437  
22  
23  
24  
25  
26  
27 16. Limwattananon S, Tangcharoensathien V, Prakongsai P. Equity in maternal and child health  
28 in Thailand. *Bull World Health Organ* 2010;88(6):420-7. doi: 10.2471/BLT.09.068791  
29  
30  
31  
32 17. Latt NN, Cho SM, Htun NMM, et al. Healthcare in Myanmar. *Nagoya J Med Sci*  
33 2016;78:123-34.  
34  
35  
36  
37 18. Myanmar Ministry of Health and Sports. Myanmar national health plan 2017 - 2021. Nay Pyi  
38 Taw: Ministry of Health and Sports 2016.  
39  
40  
41  
42 19. Kerketta S. Out of pocket expenditure on utilization of ante-natal and delivery care services  
43 in India: analysis based on NSSO 60th round. *Int J Reprod Contracept Obstet Gynecol*  
44 2015;4(6):1704-09. doi: 10.18203/2320-1770.ijrcog20151126  
45  
46  
47  
48  
49 20. Leone T, James KS, Padmadas SS. The burden of maternal health care expenditure in India:  
50 multilevel analysis of national data. *Matern Child Health J* 2013;17(9):1622-30. doi:  
51 10.1007/s10995-012-1174-9  
52  
53  
54  
55  
56  
57  
58  
59  
60

- 1  
2  
3 21. Myanmar Ministry of Immigraation and Population. Yangon Region Census Report. Nay Pyi  
4  
5       Taw: Ministry of Immigration and Population, 2014.  
6
- 7  
8 22. WHO. Sample size determination in health studies\_practical manual. Geneva: World Health  
9  
10       Organization.1991.  
11
- 12  
13 23. O'Donnell O, Doorslaer Ev, Wagstaff A, et al. Analyzing Health Equity Using Household  
14  
15       Survey Data: A Guide to Techniques and Their Implementation. Washington, D.C.: World  
16  
17       Bank 2008.  
18
- 19  
20 24. R: A language and environment for statistical computing. R Foundation for Statistical  
21  
22       Computing [program]. 1.0.153 version. Vienna, Austria, 2015.  
23
- 24  
25 25. EpiData Entry [program]. 3.1 version. Odense, Denmark, 2005.  
26
- 27  
28 26. Wagstaff A. Measuring Financial Protection in Health. Washington DC, 2008.  
29
- 30  
31 27. Wagstaff A, Doorslaer Ev. Catastrophe and impoverishment in paying for health care: with  
32  
33       applications toVietnam1993--1998. *Health Econ* 2003;12:921–34. doi: 10.1002/hec.776  
34
- 35  
36 28. Lumley T. Complex sampling and R.2009.  
37
- 38  
39 29. Mohanty SK, Kastor A. Out-of-pocket expenditure and catastrophic health spending on  
40  
41       maternal care in public and private health centres in India: a comparative study of pre and  
42  
43       post national health mission period. *Health Econ Rev* 2017;7(1):31. doi: 10.1186/s13561-  
44  
45       017-0167-1  
46  
47  
48  
49       10.4236/health.2013.51015  
50  
51  
52  
53  
54  
55  
56  
57  
58  
59  
60

- 1  
2  
3 31. Kwesiga B, Zikusooka CM, Ataguba JE. Assessing catastrophic and impoverishing effects of  
4 health care payments in Uganda. *BMC Health Servs Res* 2015;15:30. doi: 10.1186/s12913-  
5 015-0682-x  
6  
7  
8  
9  
10 32. Somkotra T, Lagrada LP. Payments for health care and its effect on catastrophe and  
11 impoverishment: Experience from the transition to Universal Coverage in Thailand. *Soc Sci*  
12 *Med* 2008;67:2027–35. doi: 10.1016/j.socscimed.2008.09.047  
13  
14  
15  
16  
17 33. Akazili J, Ataguba JE-O, Kanmiki EW, et al. Assessing the impoverishment effects of out-  
18 of-pocket healthcare payments prior to the uptake of the national health insurance scheme in  
19 Ghana. *BMC Int Health Hum Rights* 2017;17:13. doi: 10.1186/s12914-017-0121-7  
20  
21  
22  
23  
24 34. Kimani DN, Mugo MG, Kioko UM. Catastrophic Health Expenditures And Impoverishment  
25 In Kenya. *ESJ* 2016;12(15) doi: 10.19044/esj.2016.v12n15p434  
26  
27  
28  
29 35. Rashad AS, Sharaf MF. Catastrophic and Impoverishing Effects of Out-of-Pocket Health  
30 Expenditure: New Evidence from Egypt. *Am J Econ* 2015;5(5):526-33. doi:  
31 10.5923/j.economics.20150505.13  
32  
33  
34  
35 36. Sun X, Bernabe E, Liu X, et al. Determinants of Catastrophic Dental Health Expenditure in  
36 China. *PLoS Med* 2016;11(12) doi: doi:10.1371/journal.pone.0168341  
37  
38  
39  
40 37. Kinyanjui ND. Determinants And Distribution Of Catastrophic Health Expenditures And  
41 Impoverishment In Kenya. University of Nairobi, 2016.  
42  
43  
44  
45  
46  
47  
48  
49  
50  
51  
52  
53  
54  
55  
56  
57  
58  
59  
60

## List of Tables and Figure

Table 1. Background characteristics of women and their husbands, household information and accessibility of health services (n=759)

Table 2. Details of services provided and payment of the women for ANC and delivery care (n=759)

Table 3. Impoverishment out-of-pocket payments for antenatal and delivery care (n=757)

Figure 1. Pen's parade of pre- and post-payment income of overall antenatal and delivery care

Legend

— Pre-payment income      — Post-payment income  
- - - - - Income based poverty line

Table 4. Catastrophic OOP payments for antenatal and delivery care at different threshold levels (n=757)

Table 5. Determinants of impoverishment and catastrophic out-of-pocket payments with 10% threshold for overall antenatal and delivery care (n=757)

Table 1. Background characteristics of women and their husbands, household information and accessibility of health services (n=759)

| Characteristic                          | n (%)      |
|-----------------------------------------|------------|
| <b>Women characteristics</b>            |            |
| Woman's age                             |            |
| 15-24 years                             | 215 (28.3) |
| 25-34 years                             | 376 (49.5) |
| 35-49 years                             | 168 (22.1) |
| Woman's occupation                      |            |
| Housework                               | 539 (71)   |
| Any job                                 | 220 (29)   |
| <b>Husband's characteristics</b>        |            |
| Husband's education                     |            |
| Primary school and lower                | 242 (31.9) |
| More than primary school                | 517 (68.1) |
| Husband's occupation                    |            |
| Daily wage earner                       | 455 (59.9) |
| Other                                   | 304 (40.1) |
| <b>Household characteristics</b>        |            |
| Number of household members             |            |
| > 5 members                             | 276 (38.4) |
| 3-5 members                             | 483 (63.6) |
| Household annual income *               |            |
| ≤ 1275 USD                              | 83 (10.9)  |
| > 1275 USD                              | 676 (89.1) |
| Household debt                          |            |
| No                                      | 301 (39.7) |
| Yes                                     | 458 (60.3) |
| <b>Accessibility of health services</b> |            |
| Availability of health center           |            |



1  
2  
3  
4  
5  
6  
7  
8  
9  
10  
11  
12  
13  
14  
15  
16  
17  
18  
19  
20  
21  
22  
23  
24  
25  
26  
27  
28  
29  
30  
31  
32  
33  
34  
35  
36  
37  
38  
39  
40  
41  
42  
43  
44  
45  
46  
47  
48  
49  
50  
51  
52  
53  
54  
55  
56  
57  
58  
59  
60

|                             |            |
|-----------------------------|------------|
| No                          | 123 (16.2) |
| Yes                         | 636 (83.8) |
| Walking distance in minutes |            |
| > 30 minutes                | 76 (10)    |
| ≤ 30 minutes                | 683 (90)   |
| Type of transportation      |            |
| Car                         | 79 (10.4)  |
| Motorcycle                  | 172 (22.7) |
| Walking                     | 406 (53.3) |
| Other                       | 102 (13.4) |

---

\* World bank data bank 2016

For peer review only

Table 2. Details of services provided and payment of the women for ANC and delivery care  
(n=759)

|                                            | Antenatal care          | Delivery care          |
|--------------------------------------------|-------------------------|------------------------|
|                                            | n (%)                   | n (%)                  |
| <b>Health personnel</b>                    |                         |                        |
| Community health personnel                 | 428 (56.4)              | 269 (35.4)             |
| Specialists                                | 171 (22.5)              | 223 (29.4)             |
| Doctors/Nurses                             | 160 (21.1)              | 267 (35.2)             |
| <b>Place of care</b>                       |                         |                        |
| Public facilities                          | 592 (78)                | 493 (65)               |
| Private facilities                         | 167 (22)                | 266 (35)               |
| <b>Affordability (per visit/delivery)</b>  |                         |                        |
| No                                         | 26 (3.4)                | 338 (44.5)             |
| Yes                                        | 733 (96.6)              | 421 (55.5)             |
| <b>Out of pocket payment</b>               |                         |                        |
| No                                         | 186 (24.5)              | 3 (0.4)                |
| Yes                                        | 573 (75.5)              | 756 (99.6)             |
| <b>Categories of health care cost</b>      |                         |                        |
| <b>(per visit/delivery)</b>                | <b>(n=573)</b>          | <b>(n=756)</b>         |
| Hospital cost/Investigation fees           | 0.73 (0-80.8)           | 7.34 (0-1247.6)        |
| Drugs                                      | 0 (0-40.4)              | 0 (0-587.1)            |
| Consultation fees                          | 0 (0-23.9)              | 0 (0-440.3)            |
| Food/Travel/Living cost                    | 0.57 (0-73.4)           | 2.94 (0-1027.4)        |
| Productivity loss                          | 0 (0-117.4)             | 0 (0-1174.2)           |
| Other expenses                             | 0 (0-29.4)              | 0 (0-220.2)            |
| Sum of costs                               | 6.17 (0-862.3)          | 84.4 (0-2305.1)        |
| <b>Total out of pocket payment of care</b> | <b>31.7 (0-12072.2)</b> | <b>84.4 (0-2305.1)</b> |

Table 3. Impoverishment out-of-pocket payments for antenatal and delivery care (n=757)

|                        | <b>Antenatal care</b> |              |        | <b>Delivery care</b> |                | <b>Overall antenatal and delivery care</b> |        |
|------------------------|-----------------------|--------------|--------|----------------------|----------------|--------------------------------------------|--------|
|                        | Prepayment            | Post payment | Impact | Post payment         | Poverty Impact | Post payment                               | Impact |
| Poverty headcount      | 2.4%                  | 8.1%         | 5.7%   | 3.8%                 | 1.5%           | 10.3%                                      | 7.9%   |
| Normalized poverty gap | 0.01%                 | 1.32%        | 1.31%  | 0.53%                | 0.52%          | 1.44%                                      | 1.43%  |

Table 4. Catastrophic OOP payments for antenatal and delivery care at different threshold levels  
(n=757)

| Catastrophic OOP                           | Threshold |       |       |       |
|--------------------------------------------|-----------|-------|-------|-------|
|                                            | 10%       | 20%   | 30%   | 40%   |
| <b>Antenatal care</b>                      |           |       |       |       |
| Incidence                                  | 14.0%     | 9.2%  | 7.7%  | 5.5%  |
| Intensity                                  | 7.7%      | 6.0%  | 5.0%  | 4.3%  |
| Mean positive gap                          | 54.7%     | 65.3% | 65.5% | 77.5% |
| <b>Delivery care</b>                       |           |       |       |       |
| Incidence                                  | 9.5%      | 3.8%  | 2.4%  | 1.2%  |
| Intensity                                  | 2.0%      | 1.2%  | 0.9%  | 0.7%  |
| Mean positive gap                          | 20.8%     | 32.0% | 38.2% | 60.8% |
| <b>Overall antenatal and delivery care</b> |           |       |       |       |
| Incidence                                  | 22.6%     | 13.6% | 10.4% | 8.5%  |
| Intensity                                  | 11.2%     | 8.8%  | 7.4%  | 6.3%  |
| Mean positive gap                          | 49.6%     | 64.6% | 70.5% | 74.7% |

Table 5. Determinants of impoverishment and catastrophic out-of-pocket payments with 10% threshold for overall antenatal and delivery care (n=757)

| Characteristic                                  | Impoverishment OOP<br>Adjusted OR (95 % CI) | Catastrophic OOP<br>Adjusted OR (95 % CI) |
|-------------------------------------------------|---------------------------------------------|-------------------------------------------|
| <b>Woman's occupation</b>                       |                                             |                                           |
| Any job (reference category)                    | 1                                           | 1                                         |
| Housework                                       | 2.52 (1.24-5.13)*                           | 2.07 (1.21-3.52)**                        |
| <b>Number of household members</b>              |                                             |                                           |
| > 5 members (reference category)                | 1                                           | 1                                         |
| 3-5 members                                     | 5.85 (2.48-13.78)***                        | 6.19 (3.68-10.42)***                      |
| <b>Availability of health center</b>            |                                             |                                           |
| No (reference category)                         | 1                                           |                                           |
| Yes                                             | 3.65 (1.34-11.72)*                          |                                           |
| <b>Health personnel for delivery care</b>       |                                             |                                           |
| Community health personnel (reference category) | 1                                           | 1                                         |
| Specialists                                     | 6.11 (2.80-13.32)***                        | 5.98 (3.10-11.54)***                      |
| Doctors/Nurses                                  | 2.30 (0.94-5.63)                            | 3.33 (1.73-6.41)***                       |
| <b>Place of antenatal care</b>                  |                                             |                                           |
| Public facilities (reference category)          | 1                                           | 1                                         |
| Private facilities                              | 2.74 (1.44-5.22)**                          | 2.09 (1.29-3.38)**                        |
| <b>Place of delivery care</b>                   |                                             |                                           |
| Public facilities (reference category)          | 1                                           |                                           |
| Private facilities                              | 2.58 (1.31-5.07)**                          |                                           |

p < 0.05 \*, p < 0.01 \*\*, p < 0.001 \*\*\*

OR : Odds Ratio

CI : Confidence Interval

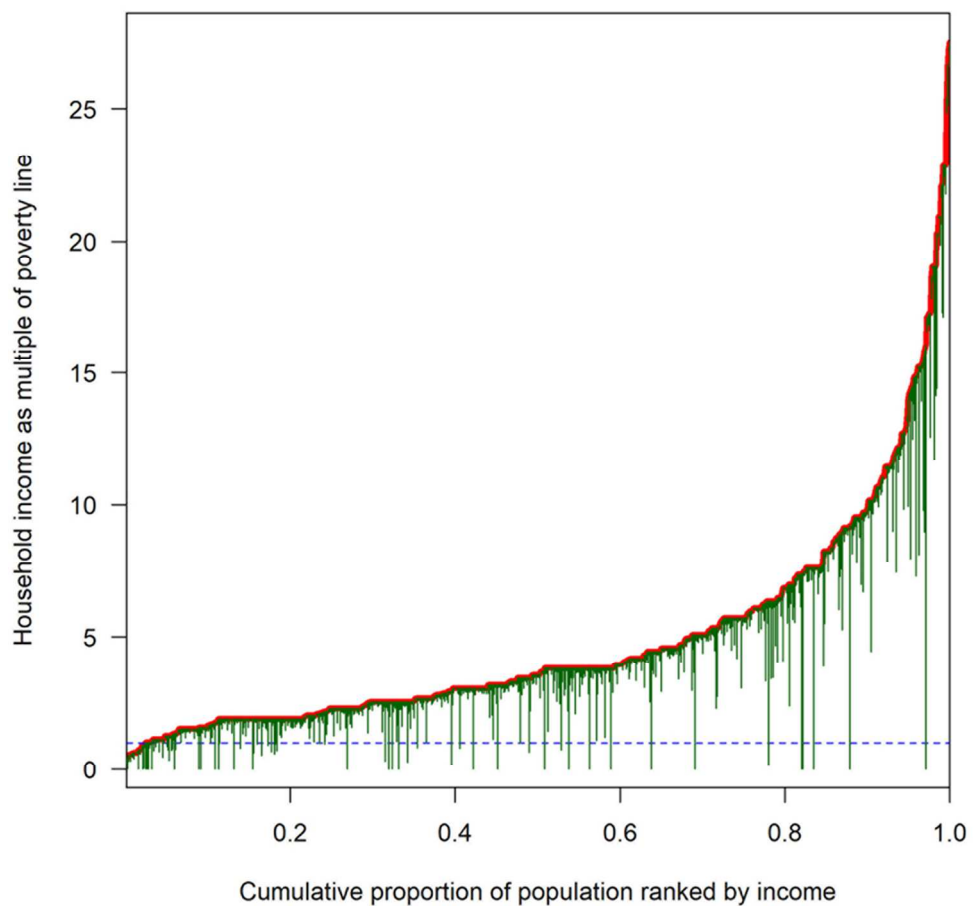

Figure 1. Pen's parade of pre- and post-payment income of overall antenatal and delivery care  
Legend

Pre-payment income Post-payment income  
Income based poverty line

80x81mm (300 x 300 DPI)

**STROBE 2007 (v4) Statement—Checklist of items that should be included in reports of *cross-sectional studies***

| Section/Topic                | Item # | Recommendation                                                                                                                                                                       | Reported on page # |
|------------------------------|--------|--------------------------------------------------------------------------------------------------------------------------------------------------------------------------------------|--------------------|
| <b>Title and abstract</b>    | 1      | (a) Indicate the study’s design with a commonly used term in the title or the abstract                                                                                               | 1-2                |
|                              |        | (b) Provide in the abstract an informative and balanced summary of what was done and what was found                                                                                  | 2                  |
| <b>Introduction</b>          |        |                                                                                                                                                                                      |                    |
| Background/rationale         | 2      | Explain the scientific background and rationale for the investigation being reported                                                                                                 | 5-6                |
| Objectives                   | 3      | State specific objectives, including any prespecified hypotheses                                                                                                                     | 6                  |
| <b>Methods</b>               |        |                                                                                                                                                                                      |                    |
| Study design                 | 4      | Present key elements of study design early in the paper                                                                                                                              | 7                  |
| Setting                      | 5      | Describe the setting, locations, and relevant dates, including periods of recruitment, exposure, follow-up, and data collection                                                      | 7                  |
| Participants                 | 6      | (a) Give the eligibility criteria, and the sources and methods of selection of participants                                                                                          | 7                  |
| Variables                    | 7      | Clearly define all outcomes, exposures, predictors, potential confounders, and effect modifiers. Give diagnostic criteria, if applicable                                             | 7,8                |
| Data sources/<br>measurement | 8*     | For each variable of interest, give sources of data and details of methods of assessment (measurement). Describe comparability of assessment methods if there is more than one group | 8                  |
| Bias                         | 9      | Describe any efforts to address potential sources of bias                                                                                                                            | 8                  |
| Study size                   | 10     | Explain how the study size was arrived at                                                                                                                                            | 7                  |
| Quantitative variables       | 11     | Explain how quantitative variables were handled in the analyses. If applicable, describe which groupings were chosen and why                                                         | 8                  |
| Statistical methods          | 12     | (a) Describe all statistical methods, including those used to control for confounding                                                                                                | 9                  |
|                              |        | (b) Describe any methods used to examine subgroups and interactions                                                                                                                  | 9                  |
|                              |        | (c) Explain how missing data were addressed                                                                                                                                          |                    |
|                              |        | (d) If applicable, describe analytical methods taking account of sampling strategy                                                                                                   | 9                  |
|                              |        | (e) Describe any sensitivity analyses                                                                                                                                                |                    |
| <b>Results</b>               |        |                                                                                                                                                                                      |                    |

|                          |     |                                                                                                                                                                                                                                                                                                                                                                                                               |             |
|--------------------------|-----|---------------------------------------------------------------------------------------------------------------------------------------------------------------------------------------------------------------------------------------------------------------------------------------------------------------------------------------------------------------------------------------------------------------|-------------|
| Participants             | 13* | (a) Report numbers of individuals at each stage of study—eg numbers potentially eligible, examined for eligibility, confirmed eligible, included in the study, completing follow-up, and analysed<br>(b) Give reasons for non-participation at each stage<br>(c) Consider use of a flow diagram                                                                                                               | 11          |
| Descriptive data         | 14* | (a) Give characteristics of study participants (eg demographic, clinical, social) and information on exposures and potential confounders<br>(b) Indicate number of participants with missing data for each variable of interest                                                                                                                                                                               | 11          |
| Outcome data             | 15* | Report numbers of outcome events or summary measures                                                                                                                                                                                                                                                                                                                                                          | 11          |
| Main results             | 16  | (a) Give unadjusted estimates and, if applicable, confounder-adjusted estimates and their precision (eg, 95% confidence interval). Make clear which confounders were adjusted for and why they were included<br>(b) Report category boundaries when continuous variables were categorized<br>(c) If relevant, consider translating estimates of relative risk into absolute risk for a meaningful time period | 11-12<br>11 |
| Other analyses           | 17  | Report other analyses done—eg analyses of subgroups and interactions, and sensitivity analyses                                                                                                                                                                                                                                                                                                                |             |
| <b>Discussion</b>        |     |                                                                                                                                                                                                                                                                                                                                                                                                               |             |
| Key results              | 18  | Summarise key results with reference to study objectives                                                                                                                                                                                                                                                                                                                                                      | 13          |
| Limitations              | 19  | Discuss limitations of the study, taking into account sources of potential bias or imprecision. Discuss both direction and magnitude of any potential bias                                                                                                                                                                                                                                                    | 15          |
| Interpretation           | 20  | Give a cautious overall interpretation of results considering objectives, limitations, multiplicity of analyses, results from similar studies, and other relevant evidence                                                                                                                                                                                                                                    | 13-14       |
| Generalisability         | 21  | Discuss the generalisability (external validity) of the study results                                                                                                                                                                                                                                                                                                                                         | 14          |
| <b>Other information</b> |     |                                                                                                                                                                                                                                                                                                                                                                                                               |             |
| Funding                  | 22  | Give the source of funding and the role of the funders for the present study and, if applicable, for the original study on which the present article is based                                                                                                                                                                                                                                                 | 16          |

\*Give information separately for cases and controls in case-control studies and, if applicable, for exposed and unexposed groups in cohort and cross-sectional studies.

**Note:** An Explanation and Elaboration article discusses each checklist item and gives methodological background and published examples of transparent reporting. The STROBE checklist is best used in conjunction with this article (freely available on the Web sites of PLoS Medicine at <http://www.plosmedicine.org/>, Annals of Internal Medicine at <http://www.annals.org/>, and Epidemiology at <http://www.epidem.com/>). Information on the STROBE Initiative is available at [www.strobe-statement.org](http://www.strobe-statement.org).



# BMJ Open

## Impoverishment and catastrophic expenditures due to out-of-pocket payments for antenatal and delivery care and their determinants in Yangon region, Myanmar: a cross-sectional study

|                                 |                                                                                                                                                                                                                                                                                                                                                                                                                                                                                                                                                              |
|---------------------------------|--------------------------------------------------------------------------------------------------------------------------------------------------------------------------------------------------------------------------------------------------------------------------------------------------------------------------------------------------------------------------------------------------------------------------------------------------------------------------------------------------------------------------------------------------------------|
| Journal:                        | <i>BMJ Open</i>                                                                                                                                                                                                                                                                                                                                                                                                                                                                                                                                              |
| Manuscript ID                   | bmjopen-2018-022380.R1                                                                                                                                                                                                                                                                                                                                                                                                                                                                                                                                       |
| Article Type:                   | Research                                                                                                                                                                                                                                                                                                                                                                                                                                                                                                                                                     |
| Date Submitted by the Author:   | 03-May-2018                                                                                                                                                                                                                                                                                                                                                                                                                                                                                                                                                  |
| Complete List of Authors:       | Myint, Aye Nyein Moe; Ministry of Health and Sports, International Relations Division<br>Liabsuetrakul, Tippawan; Prince of Songkla University, Epidemiology Unit, Faculty of Medicine<br>Htay, Thein Thein; Seisa University, Visiting Professor<br>Wai, Myint Myint; Ministry of Health and Sports, Department of Medical Services (Planning)<br>Sundby, Johanne; University of Oslo, Department of Community and Global Health<br>Bjertness, Espen; University of Oslo, Section for Preventive Medicine and Epidemiology, Institute of Health and Society |
| <b>Primary Subject Heading</b>: | Health policy                                                                                                                                                                                                                                                                                                                                                                                                                                                                                                                                                |
| Secondary Subject Heading:      | Public health, Health economics, Obstetrics and gynaecology                                                                                                                                                                                                                                                                                                                                                                                                                                                                                                  |
| Keywords:                       | Health policy < HEALTH SERVICES ADMINISTRATION & MANAGEMENT, Public health < INFECTIOUS DISEASES, PRIMARY CARE, Health economics < HEALTH SERVICES ADMINISTRATION & MANAGEMENT                                                                                                                                                                                                                                                                                                                                                                               |
|                                 |                                                                                                                                                                                                                                                                                                                                                                                                                                                                                                                                                              |

SCHOLARONE™  
Manuscripts

1  
2  
3 **Impoverishment and catastrophic expenditures due to out-of-pocket payments for antenatal**  
4 **and delivery care and their determinants in Yangon region, Myanmar: a cross-sectional study**  
5  
6

7 Aye Nyein Moe Myint, M.B., B.S, MPH, MA (Pop & RH)<sup>1</sup>, Tippawan Liabsuetrakul, MD,  
8 PhD<sup>2\*</sup>, Thein Thein Htay, M.B., B.S, M.Med.Sc (PH), MHS (Pop & RH)<sup>3</sup>, Myint Myint Wai, M.B.,  
9 B.S, M.Med.Sc (PH)<sup>4</sup>, Johanne Sundby, MD, PhD<sup>5</sup>, Espen Bjertness, PhD<sup>6</sup>  
10  
11  
12  
13

14 <sup>1</sup>International Relations Division, Ministry of Health and Sports, Nay Pyi Taw, Myanmar

15 Email: [anmoemyint@gmail.com](mailto:anmoemyint@gmail.com)

16  
17 <sup>2</sup>Epidemiology Unit, Faculty of Medicine, Prince of Songkla University, Hat Yai, Songkhla,  
18 Thailand  
19

20  
21 <sup>3</sup>Seisa University, Ashigarashimo District, Kanagawa, Japan

22 Email: [htaythein90@gmail.com](mailto:htaythein90@gmail.com)

23  
24 <sup>4</sup>Department of Medical Services (Planning), Ministry of Health and Sports, Nay Pyi Taw,  
25 Myanmar, Email: [m.m.wai@studmed.uio.no](mailto:m.m.wai@studmed.uio.no)  
26

27  
28 <sup>5</sup>Department of Community and Global Health, University of Oslo, Norway

29 Email: [johanne.sundby@medisin.uio.no](mailto:johanne.sundby@medisin.uio.no)

30  
31 <sup>6</sup>Department of Community and Global Health, University of Oslo, Norway

32 Email: [espen.bjertness@medisin.uio.no](mailto:espen.bjertness@medisin.uio.no)  
33  
34  
35

36  
37 \*Correspondence: Tippawan Liabsuetrakul

38 Epidemiology Unit, Faculty of Medicine

39 Prince of Songkla University

40 Hat Yai, Songkhla, 90110, Thailand

41 Tel: +66 74 451165 Fax: +66 74 429754

42 E-mail: [ltippawa@yahoo.com](mailto:ltippawa@yahoo.com)  
43  
44  
45  
46  
47

48 Word count: 3,346 words

49 Number of tables: 5

50 Number of figures: 1  
51  
52  
53  
54  
55  
56  
57  
58  
59  
60

### Abstract (300 words)

**Objectives:** To assess the levels of impoverishment and catastrophic expenditure due to out-of-pocket (OOP) payments for antenatal care (ANC) and delivery care in Yangon Region, Myanmar and explore their determinants.

**Design, setting and participants:** A community-based cross-sectional survey among women giving birth within the past 12 months in Yangon, Myanmar was conducted during October-November 2016 using three-stage cluster sampling.

**Outcome measures:** Impact of poverty headcount and normalized poverty gap were used to assess impoverishment with a poverty threshold of US\$1.9. Out-of-pocket payments exceeding 10% of household annual income were used to assess catastrophic expenditure measuring incidence, intensity and mean positive gap. Multiple logistic regression using a survey package was used for analysis to estimate odds ratios (OR) and 95% confidence interval of determinants of impoverishment and catastrophic expenditure due to OOP payments in the utilization of ANC and delivery care.

**Results:** Of 759 women, out-of-pocket payments were used by 75% of the women for ANC and by 99.6% for delivery care. The impact of the poverty headcount was 5.7% for ANC, 1.5% for delivery care and 7.9% for overall ANC and delivery care. Overall incidences of catastrophic expenditure were 22.6%, 14% for ANC and 9.5% for delivery care. Women's occupation, number of household members, number of ANC visits, utilization of health personnel and health facilities were important determinants for impoverishment and catastrophic expenditure caused by accessing ANC and delivery care.

**Conclusions:** Out-of-pocket payment for all ANC and delivery care is a challenge as one-tenth of women using these services become impoverished and one-fourth face catastrophic expenditure after utilization of ANC and delivery care. Social characteristics and seeking services from the local

1  
2 health system are important factors causing women's financial burden that require policy  
3  
4 integration to reduce the burden and move towards the implementation of universal health coverage  
5  
6  
7 in the country.  
8  
9

10  
11  
12 **Key words:** impoverishment, catastrophic payments, out-of-pocket payment, antenatal care,  
13  
14 delivery care  
15

### 16 17 18 **Strengths and limitations of this study** 19

- 20  
21 • This study measured the level of impoverishment and catastrophic expenditure due to OOP  
22  
23 payment for antenatal and delivery care and their determinants in Myanmar, which is a low-  
24  
25 income country.  
26
- 27  
28 • Multistage sampling and a survey package of analysis were used to minimize the realistic  
29  
30 standard errors.  
31
- 32  
33 • Direct and indirect expenditures for antenatal and delivery care in terms of societal  
34  
35 perspective were collected.  
36
- 37  
38 • Recall bias might have occurred due to the data collection based on retrospective interviews.  
39
- 40  
41 • Self-reported household annual income and payments for healthcare services may have been  
42  
43 slightly over- or under-reported.  
44  
45  
46  
47  
48  
49  
50  
51  
52  
53  
54  
55  
56  
57  
58  
59  
60

## Introduction

Worldwide, nearly 830 women die during pregnancy and childbirth every day, with most of them living in poor households having limited proper maternal health care.<sup>1</sup> Increasing utilization of maternal health services is one of the targets of Sustainable Development Goal 3.<sup>2</sup> Poverty or financial problems are the major barrier to accessibility and utilization of antenatal care (ANC) and delivery by skilled birth attendants (SBAs).<sup>3</sup> Even though the economic indicators of most countries in 2015 are better than in earlier years, there are still some countries which face financial barriers leading to worse health outcomes.<sup>2</sup>

Low socioeconomic level or high health care expenditures can lead to financial burdens, either impoverishment or catastrophic expenditure, which use different analyses and thresholds of burden.<sup>4,5</sup> Impoverishment is defined as ‘a non-poor household is impoverished by health care payment when it became poor after health care payment’.<sup>6</sup> Catastrophic expenditure is defined as ‘out-of-pocket (OOP) payment for health care that exceeds some estimated proportion of household income or a household’s capacity to pay’.<sup>7</sup> Financial burdens from utilization of maternal health care have been previously reported in some African and Asian countries such as Ghana, Nepal, Bangladesh, and India.<sup>8-11</sup> In Myanmar, OOP payment for health services was high in public and private health facilities and accounted for more than 80% for total health expenditures of the country in 2012.<sup>12</sup> Only one study of OOP payments for maternal health care in Myanmar with percentage of catastrophic health expenditures in Myanmar was found<sup>13</sup>, therefore, the evidence on impoverishment and catastrophic payments of ANC and delivery care and their determinants was limited.

Different countries have introduced different strategies to reduce financial burdens related to accessing necessary health care during pregnancy, child birth and the postpartum period.<sup>14</sup> Providing free maternal health services has been implemented in some low-income

1  
2 countries, but various studies have found low utilization of these services as well as high maternal  
3 mortality and morbidity.<sup>9 15 16</sup> A study in Thailand found improvement of maternal health outcomes  
4 five years after the implementation of a universal coverage scheme with health finance reform.<sup>17</sup>  
5  
6 Although some countries have begun to offer free health services or health insurance, the  
7  
8 achievements in terms of reducing financial burdens remains limited.<sup>14</sup>  
9  
10  
11  
12  
13

14 Similarly, Myanmar has begun a program providing free essential drugs and health care for  
15 maternal health services in both public facility-based and primary health care settings in recent  
16 years, but OOP payment while accessing these services has been reported.<sup>12 18 19</sup> In addition, reports  
17 on the actual financial burden in terms of impoverishment and catastrophic expenditure due to OOP  
18 payments are limited.<sup>13</sup> Understanding the determinants of financial burden in utilizing maternal  
19 health services is useful to identify the nature of the OOP payment situation and whether any  
20 determinants are modifiable or require policy improvement.<sup>16 20 21</sup> This study aimed to assess the  
21 levels of impoverishment and catastrophic expenditure due to OOP payments for ANC and delivery  
22 care in Yangon Region, Myanmar and explore the determinants of impoverishment and catastrophic  
23 expenditure.  
24  
25  
26  
27  
28  
29  
30  
31  
32  
33  
34  
35  
36

## 37 **Methods**

### 38 *39 Study design, participants and sampling method*

40 This was a community-based cross-sectional survey conducted in Yangon Region of Myanmar  
41 during October and November 2016. According to the 2014 census report, Yangon region had the  
42 largest population among the regions of Myanmar.<sup>22</sup> The study recruited women of reproductive  
43 age (15-49 years) with a history of birth within the previous 12 months who were residents of the  
44 study area. Those who had mental retardation or serious illness were excluded. The required sample  
45 size for the first objective was calculated using the one-proportion formula based on a rate of 9% of  
46 pregnant women with catastrophic expenditure due to OOP payments in utilization of delivery care  
47  
48  
49  
50  
51  
52  
53  
54  
55  
56  
57  
58  
59  
60

1  
2  
3 from a previous study.<sup>13 23</sup> With a precision of 4%, type I error of 1%, non-response rate of 10% and  
4  
5 design effect of 2, at least 750 women were required.

6  
7 Three-stage cluster sampling was used to select eligible persons. For stage one, purposive  
8  
9 selection of two districts among the four districts of Yangon region which covered both urban and  
10  
11 rural populations was done. There were a total of 235 wards and 610 villages in the two districts.  
12  
13 “Wards” and “villages” refer to urban and rural populations, respectively.<sup>24</sup> For stage two, 16 wards  
14  
15 and 16 villages were randomly selected from all of the wards and villages. Households were  
16  
17 selected regarding the number of households and a ratio of urban to rural population size in the  
18  
19 districts considering the proportional probability sampling (PPS). For stage three, we randomly  
20  
21 selected women who had delivered within the past 12 months in each household from selected  
22  
23 wards and villages. For households with more than one eligible woman, one woman was selected  
24  
25 randomly.  
26  
27  
28

### 29 30 ***Patient and Public Involvement***

31  
32 Women and household members or the public were not involved in the development of the research  
33  
34 questions, design of the study or recruitment. The results are not directly disseminated to study  
35  
36 participants.  
37  
38

### 39 40 ***Variables***

41  
42 Impoverishment and catastrophic expenditure due to OOP payment for overall ANC and delivery  
43  
44 care were the two main outcome variables in this study. OOP payments included all related  
45  
46 healthcare services received during ANC and delivery care, namely hospital costs/investigation  
47  
48 fees, drugs, consultation fees, food/living/transportation payments, productivity loss and other costs.  
49  
50 The OOP payments were calculated for ANC and delivery care and then summed as total OOP  
51  
52 payments for care. OOP payments for ANC were counted as the sum of all ANC visits.  
53  
54

55  
56 Impoverishment was defined as a household which was forced below the international poverty line  
57  
58  
59

1  
2  
3 (counted as 1.9 US dollars (USD) per day purchasing power parity (PPP)) after paying for maternal  
4 health care services.<sup>6 25</sup> Catastrophic expenditure was defined as OOP payment for maternal health  
5 care services exceeding a threshold of 10% of a household's annual income.<sup>26</sup>  
6  
7

8  
9 Independent variables included background characteristics of the women and their husbands  
10 and household information, accessibility of health services, characteristics of ANC and delivery  
11 care and details of services provided. Household annual income was recorded in Myanmar kyats  
12 and converted to US\$ using the exchange rate of 1 USD equal to 1362.63 kyats. The information  
13 pertaining to accessibility to health services included availability of a health center, distance as  
14 measured in walking minutes (number of walking minutes from the woman's house to a formal health  
15 center) and types of transportation (women who used any transport to visit a health center).  
16 Characteristics of ANC and delivery care included complications during pregnancy and child birth  
17 and number of ANC visits. Details of services provided included health personnel, place of care,  
18 affordability, and OOP payments.  
19  
20  
21  
22  
23  
24  
25  
26  
27  
28  
29  
30  
31

### 32 ***Data collection***

33  
34 Before the data collection began, 12 research assistants were trained in a two-day training workshop  
35 on how to conduct the interviews and check the information for completeness of data. The list of  
36 women was obtained from the township health departments and local authorities. The eligible  
37 women were visited at their home by the research team at the woman's convenience. After the  
38 study was explained and a consent form signed, the women were interviewed by the principal  
39 investigator and researchers using a pre-tested structured questionnaire in a private area. Each  
40 completed interview was checked promptly and daily for any errors and edited if required.  
41  
42  
43  
44  
45  
46  
47  
48  
49  
50

### 51 ***Statistical analysis***

52  
53 After data collection was complete, EpiData 3.1 was used to record the data in a double entry  
54 system and validate it, and R version 3.4.2 was used for data analysis.<sup>27 28</sup> Categorical variables are  
55  
56  
57  
58  
59  
60



1  
2  
3 presented by frequencies and percentages and continuous variables are shown in median with  
4  
5 interquartile range.  
6

7 The impoverishment was analyzed in terms of the poverty impact of poverty headcount and  
8  
9 normalized poverty gap.<sup>29 30</sup> The poverty impact of the poverty headcount was calculated by  
10  
11 subtracting pre-payment head count from post-payment head count. Similarly, the poverty impact  
12  
13 of the normalized poverty gap was calculated by subtracting pre-payment normalized poverty gap  
14  
15 from post-payment normalized poverty gap.<sup>29</sup> Poverty head count was defined as the proportion of  
16  
17 households who had pre- or post-payment household annual income less than the defined poverty  
18  
19 line. Normalized poverty gap was defined as the poverty gap divided by the poverty line. The  
20  
21 poverty gap was calculated by the depth of payment below the poverty line. A Pen's parade graph  
22  
23 between household income as a multiple of the poverty line (y axis) with cumulative proportion of  
24  
25 the population ranked by household income (x axis) was plotted to show the number of non-poor  
26  
27 households which became poor after OOP for pregnancy expenses as indicated by the vertical lines  
28  
29 below the poverty line.  
30  
31  
32  
33

34  
35 Catastrophic expenditure was analyzed in terms of the incidence, intensity and mean  
36  
37 positive gap. Incidence was calculated by the proportion of households having catastrophic  
38  
39 expenditure due to OOP payments for ANC or delivery care. Intensity was calculated by the  
40  
41 proportion of OOP payments exceeding the threshold. The mean positive gap was calculated as  
42  
43 intensity divided by incidence indicating the proportion of OOP payments for ANC and delivery  
44  
45 care by the catastrophic household.<sup>26 30</sup>  
46  
47

48  
49 The determinants of the incidences of impoverishment and catastrophic expenditure were  
50  
51 analyzed using multiple logistic regression with the survey package to consider the design weight in  
52  
53 cluster design. According to this analysis, the first-stage weight was calculated by the total number  
54  
55 of wards and villages divided by the selected number of wards and villages by each district and the  
56  
57  
58  
59

1  
2  
3 second-stage weight was calculated by the total number of women divided by the selected number  
4  
5 of women in each ward and village by each district. The final stage weight was calculated by  
6  
7 multiplying the first stage and second stage weights.<sup>31</sup> The adjusted Odd Ratios (OR) and 95%  
8  
9 confidence intervals were presented in the final models with the significance value less than 0.05.

## 11 **Results**

12  
13  
14 A total of 759 women were included in this study. More than two-thirds of the women lived in an  
15  
16 urban area. Half of the women were aged 24- 35 years and 71% were housewives. More than two-  
17  
18 thirds of their husbands had above primary school level education and 60% of them worked as daily  
19  
20 wage-earners. Most of the households had less than five household members and 89% of them had  
21  
22 an annual household income above 1275 US dollars (USD), and 60.3% of the households had debt.  
23  
24 More than 80% of the women said that a health center was available for them to get ANC services  
25  
26 within 30 minutes walking distance. Only 21.2% of the women had less than four ANC visits and  
27  
28 15% and 23% of them faced complications during pregnancy and child birth, respectively (Table 1).

29  
30  
31  
32 Table 2 shows the details of the services used and payments of the women for ANC and  
33  
34 delivery care. More than half (56.4%) met community health personnel for ANC followed by  
35  
36 specialists (22.5%) and doctors/nurses (21.1%). Similar numbers had delivery by community health  
37  
38 personnel (35.4%) or doctors/nurses (35.2%), with the rest by specialists (29.4%). Most of the  
39  
40 women used public facilities for ANC (78%) and delivery care (65%). Almost all of the women  
41  
42 said that they could afford the cost of each ANC visit and half could afford the cost of delivery care.  
43  
44 OOP payments were made by 75% of the women for ANC and by 99.6% for delivery care. Hospital  
45  
46 costs/investigation fees were highest for ANC and delivery care. Cost per each ANC visit was  
47  
48 lower, but the total cost for all ANC visits was higher, than the total cost of delivery care.

49  
50  
51  
52  
53 Table 3 shows the level of impoverishment created by OOP payments for ANC and delivery  
54  
55 care. The impact on poverty headcount after payment for overall ANC and delivery care was 7.9%

1  
2  
3 of which 5.7% was for ANC and 1.5% for delivery care. The impact of the normalized poverty gap  
4 was quite similar for ANC (1.3%) and for overall ANC and delivery care (1.4%). Individual pre-  
5 payment and post-payment income for OOP of overall ANC and delivery care is shown in a Pen's  
6  
7 parade graph (Fig 1). Overall OOP payments for ANC and delivery care lead to some extent of  
8  
9 poverty regardless of household income level. Table 4 presents the data on catastrophic  
10  
11 expenditures due to OOP payments for ANC and delivery care. The incidence of catastrophic  
12  
13 expenditure due to OOP payments for overall ANC and delivery care was 22.6%, and 14% for  
14  
15 ANC and 9.5% for delivery care. The intensities and mean positive gaps of catastrophic expenditure  
16  
17 due to OOP for overall ANC and delivery care were 11.2% and 49.6%, respectively.  
18  
19  
20  
21  
22

23 The determinants of impoverishment and catastrophic expenditure due to OOP payment for  
24  
25 ANC and delivery care are shown in Table 5. Woman's occupation, number of household members,  
26  
27 number of ANC visits, different health personnel providing delivery services, and place of ANC  
28  
29 received were the significant determinants of both impoverishment and catastrophic expenditure for  
30  
31 overall ANC and delivery care. Using delivery services from a private facility was a significant  
32  
33 determinant of impoverishment, but not of catastrophic expenditure.  
34  
35  
36

## 37 Discussion

38  
39 Approximately one in ten women accessing ANC and one-fourth of women delivering a baby in the  
40  
41 study area faced impoverishment or catastrophic expenditure due to OOP payments. Women with a  
42  
43 higher number of household members or increased use of ANC visits or who accessed specialists or  
44  
45 private services were more likely to face impoverishment or catastrophic expenditure.  
46  
47  
48

49 Even though free maternal healthcare services are nationally available, at least three-fourths  
50  
51 of the women incurred OOP payments, which was the same as a previous study in Myanmar in  
52  
53 2015.<sup>13</sup> This finding was also similar to previous studies from India in 2004<sup>20</sup> and Nigeria in 2010<sup>15</sup>,  
54  
55 though the maternal health services considered and the methods of OOP measurement were  
56  
57  
58  
59  
60

1  
2 different. Similarly, a study of three African countries where free delivery care was available found  
3 that 90% of the women still paid some amount of OOP for their direct medical expenses.<sup>32</sup> A  
4 possible explanation might be due to the existence of high informal payments or some expenses not  
5 covering by health insurance.<sup>12 13 15 20 32</sup> The need to turn to OOP payments has been shown to  
6 influence the utilization of maternal health services and maternal mortality.<sup>33</sup> Importantly, another  
7 study reported that high OOP payments for maternal healthcare also lead households to  
8 impoverishment and catastrophic expenditure.<sup>4</sup>

9  
10 The impoverishment rates in published studies vary depending on the methods used to  
11 measure health care expenditures and the poverty line thresholds used for calculating  
12 impoverishment. We used the international poverty line in 2011 of US\$ 1.9 per day. A study from  
13 Nepal used the international standard from a different year (the international poverty line in 2005 of  
14 US\$ 1 per day).<sup>10</sup> The poverty headcount due to the use of institutional delivery reported was 17%  
15 which was higher results than us. In contrast, a study in India used their local poverty line and  
16 found higher impoverishment due to maternal health care expenditure than the findings of our  
17 study.<sup>34</sup> Although Yangon region is the most developed region among the states and regions of  
18 Myanmar, a lot of non-poor households face impoverishment and deep poverty which could be  
19 explained by high maternal healthcare payments without a compensation scheme.<sup>12 22</sup> Two studies  
20 from India using data from 2004 and 2015 found that the impact of the poverty headcount for  
21 maternal healthcare expenditures was lower after introducing free services for delivery care in  
22 2015.<sup>34 35</sup>

23  
24 Likewise, variations in the incidence of catastrophic expenditure due to maternal health care  
25 expenditures depend on the different maternal services measured, whether household income or  
26 capacity to pay is considered, and the catastrophic expenditure threshold used. One fourth of  
27 women faced catastrophic expenditure due to OOP payment for ANC and delivery care in our  
28  
29  
30  
31  
32  
33  
34  
35  
36  
37  
38  
39  
40  
41  
42  
43  
44  
45  
46  
47  
48  
49  
50  
51  
52  
53  
54  
55  
56  
57  
58  
59  
60

1  
2  
3 study, which was higher than an earlier study from Myanmar in 2015. This may be because the  
4  
5 previous study measured catastrophic expenditure based only on OOP payments for delivery care,  
6  
7 not ANC, and also only direct and indirect medical costs, not other costs or productivity loss.<sup>13</sup>  
8  
9 Higher incidences of catastrophic expenditure due to OOP were reported in India and Ethiopia  
10  
11 because poorer women were included and all ANC, delivery and postnatal care services were  
12  
13 measured.<sup>34 36</sup> Prior studies from Africa and Bangladesh concluded that more than one third of  
14  
15 women faced catastrophic expenditure due to OOP payments for emergency obstetric care because  
16  
17 they were poor and were required to pay for drugs.<sup>37-39</sup>  
18  
19

20  
21 Woman's occupation, number of household members, utilization of health personnel,  
22  
23 number of ANC visits and place of care were associated with impoverishment and catastrophic  
24  
25 expenditure due to OOP payments. A previous study could not identify a direct association between  
26  
27 occupation and impoverishment and catastrophic expenditure. The significant association between  
28  
29 woman's occupation and impoverishment and catastrophic expenditure found in our study could be  
30  
31 explained by woman reduced working because of their pregnancy leading to lower household  
32  
33 income. The number of household members increased the impoverishment and catastrophic  
34  
35 expenditure in our study which was different from a previous study from India<sup>21</sup> which could be  
36  
37 explained by lower sharing financial resources among household members of our study participants.  
38  
39 The finding of higher rates of catastrophic expenditure in women with a higher number of ANC  
40  
41 visits in our study was the same as a study in India which included women with low economic  
42  
43 status.<sup>40</sup> Other studies have found that women who used a nearby health center or facilities having  
44  
45 specialists and private facilities for ANC and delivery care where health insurance was not available  
46  
47 were more likely to have impoverishment and catastrophic expenditure.<sup>16 20 21 33 40 41</sup>  
48  
49  
50  
51  
52

53 Only one previous study from Myanmar in rural areas of a township in Ayeyarwaddy region  
54  
55 measured catastrophic health expenditure resulting from maternal health care.<sup>13</sup> Our study included  
56  
57  
58  
59  
60

1  
2 both rural and urban areas of Yangon region, and provides important information on these factors  
3  
4 for policy makers to help them consider financial burdens leading to impoverishment or  
5  
6 catastrophic expenditure.  
7  
8

9 The study had some limitations. First, this was a cross sectional study, thus the causal  
10  
11 relationship between the determinants and level of impoverishment and catastrophic expenditure  
12  
13 due to OOP payments for ANC and delivery care could not be firmly identified. Second, household  
14  
15 annual income and payments for healthcare services were self-reported, therefore, there may have  
16  
17 been over- or under-reporting. Third, the payment of total ANC used the payment of last ANC visit  
18  
19 and then multiplied by the total number of all visits. Fourth, recall bias might have occurred due to  
20  
21 the data gathering through retrospective interviews. However, we included only women within 12  
22  
23 months of delivery to minimize the recall bias. Finally, the socioeconomic status of the people in  
24  
25 the Yangon region is better than in other regions; therefore, the findings of this study are not likely  
26  
27 representative of the entire country.  
28  
29  
30  
31

### 32 **Conclusion**

33  
34 High OOP payments for using ANC and delivery care in the Yangon region of Myanmar resulted in  
35  
36 one-tenth of the women becoming impoverished and one-fourth suffering a catastrophic  
37  
38 expenditure. Women with no income or those who accessed health facilities with high levels of  
39  
40 services provided were more likely to be impoverished or face catastrophic expenses.  
41  
42  
43

### 44 **Acknowledgements**

45  
46 This study was a part of the thesis of the first author to fulfill the requirements of a doctoral degree  
47  
48 in Epidemiology at Prince of Songkla University. We would like to thank the Regional Department  
49  
50 of Yangon for their permission and support in supplying lists of women.  
51  
52  
53  
54  
55  
56  
57  
58  
59  
60

## Contributors

All authors contributed to the concept and design of the study. ANMM and TL participated in data collection, data analysis, interpretation of the data, and preparation of the draft manuscript. TTH, MMW, JS and EB also assisted with interpretation of the data and commented on the draft MS. All authors read and approved the final manuscript.

## Competing interests

The authors declare no competing interests.

## Funding

The study was supported by the Norwegian Programme for Capacity Development in Higher Education and Research for Development (NORHED) through the project entitled “Health and Sustainable Development in Myanmar – Competence Building in Public Health (MY-NORTH)”.

## Ethical approval

Ethical clearances for the study were obtained from the Ethical Review Committee of Prince of Songkla University, Thailand, the Department of Medical Research, Myanmar and the Norwegian National Research Ethics Committee (NSD), Norway.

## Data sharing statement

No additional data available. Original data without identity can be provided on request after the Ethical Review Committee of Prince of Songkla University are informed and approved.

## References

1. WHO. *Maternal mortality fact sheet*. Geneva: World Health Organization, 2016.
2. WHO. *Health in 2015: from MDGs, millennium development goals to SDGs, sustainable development goals*. Geneva: World Health Organization, 2015.
3. UNICEF. *Monitoring and situation of child and women*. New York: United Nations International Children's Emergency Fund, 2015.
4. Saksena P, Hsu J, Evans DB. Financial risk protection and universal health coverage: evidence and measurement challenges. *PLoS Med* 2014;11(9):e1001701.
5. WHO, World Bank. *Tracking universal health coverage*. Geneva: World Health Organization, 2015.
6. WHO. *Distribution of health payments and catastrophic expenditures methodology*. Geneva: World Health Organization, 2005.
7. Pal R. Measuring incidence of catastrophic out-of-pocket health expenditure: with application to India. *Int J Health Care Finance Econ* 2012;12(1):63-85.
8. Skordis-Worrall J, Pace N, Bapat U, et al. Maternal and neonatal health expenditure in Mumbai slums (India): a cross sectional study. *BMC Public Health* 2011;11:150.
9. Dalaba MA, Akweongo P, Aborigo RA, et al. Cost to households in treating maternal complications in northern Ghana: a cross sectional study. *BMC Health Servs Res* 2015;15:34.
10. Gartoulla P, Liabsuetrakul T, Chongsuvivatwong V, et al. Ability to pay and impoverishment among women who give birth at a university hospital in Kathmandu, Nepal. *Glob Public Health* 2012;7(10):1145-56.
11. Rahman M, Rob U, Noor FR, et al. Out-of-pocket expenses for maternity care in rural Bangladesh: a public-private comparison. *Int Q Community Health Educ* 2012;33(2):143-57.
12. World Bank. *Myanmar: public expenditure review*. Washington D.C: World Bank, 2015.



- 1  
2  
3 13. Han WW, Saw S, Einda HMT, et al. Out of pocket expenditure on maternal and child health  
4  
5 care services among rural households in Dedaye township, Myanmar. *Myanmar Med J*  
6  
7 2017;59(2):1-45.  
8
- 9  
10 14. Borghi J, Ensor T, Somanathan A, et al. Mobilising financial resources for maternal health.  
11  
12 *Lancet* 2006;368(9545):1457-65.  
13
- 14  
15 15. Kalu-Umeh NN, Sambo MN, Idris SH, et al. Costs and patterns of financing maternal health  
16  
17 care services in rural communities in northern Nigeria: evidence for designing a national fee  
18  
19 exemption policy. *Int J MCH AIDS* 2013;2(1):163-72.  
20
- 21  
22 16. Goli S, Moradhvaj, Rammohan A, et al. High spending on maternity care in India: what are the  
23  
24 factors explaining it? *PloS One* 2016;11:6.  
25
- 26  
27 17. Limwattananon S, Tangcharoensathien V, Prakongsai P. Equity in maternal and child health in  
28  
29 Thailand. *Bull World Health Organ* 2010;88(6):420-7.  
30
- 31  
32 18. Latt NN, Cho SM, Htun NMM, et al. Healthcare in Myanmar. *Nagoya J Med Sci* 2016;78:123-  
33  
34 34.  
35
- 36  
37 19. Myanmar Ministry of Health and Sports. *Myanmar national health plan 2017 - 2021*. Nay Pyi  
38  
39 Taw: Ministry of Health and Sports, 2016.  
40
- 41  
42 20. Kerketta S. Out of pocket expenditure on utilization of ante-natal and delivery care services in  
43  
44 India: analysis based on NSSO 60th round. *Int J Reprod Contracept Obstet Gynecol*  
45  
46 2015;4(6):1704-09.  
47
- 48  
49 21. Leone T, James KS, Padmadas SS. The burden of maternal health care expenditure in India:  
50  
51 multilevel analysis of national data. *Matern Child Health J* 2013;17(9):1622-30.  
52
- 53  
54 22. Myanmar Ministry of Immigration and Population. *Yangon region census report*. Nay Pyi Taw:  
55  
56 Ministry of Immigration and Population, 2014.  
57  
58  
59  
60

- 1  
2  
3 23. WHO. *Sample size determination in health studies: practical manual*. Geneva: World Health  
4  
5 Organization, 1991.
- 6  
7 24. Myanmar Ministry of Home Affairs. *Myanmar administrative structure*. Nay Pyi Taw: MOHA,  
8  
9 2012.
- 10  
11 25. World Bank. *Country poverty brief, Myanmar*. Washington D.C: World Bank, 2017.
- 12  
13 26. O'Donnell O, Doorslaer Ev, Wagstaff A, et al. *Analyzing health equity using household survey*  
14  
15 *data: a guide to techniques and their implementation*. Washington, D.C.: World Bank 2008.
- 16  
17 27. R: a language and environment for statistical computing. R foundation for statistical computing.  
18  
19 1.0.153 version. Vienna, Austria, 2015.
- 20  
21 28. Lauritsen JM, Bruus M. EpiData (version ). A comprehensive tool for validated entry and  
22  
23 documentation of data. The EpiData Association, Odense, Denmark, 2003-2005.
- 24  
25 29. Wagstaff A. *Measuring financial protection in health*. Washington DC: World Bank, 2008.
- 26  
27 30. Wagstaff A, Doorslaer EV. Catastrophe and impoverishment in paying for health care: with  
28  
29 applications to Vietnam 1993--1998. *Health Econ* 2003;12:921-34.
- 30  
31 31. Lumley T. *Complex sampling and R*. Seattle: University of Washington, 2009.
- 32  
33 32. Perkins M, Brazier E, Themmen E, et al. Out-of-pocket costs for facility-based maternity care in  
34  
35 three African countries. *Health Policy Plan* 2009;24(4):289-300.
- 36  
37 33. Mohanty SK, Kastor A. Out-of-pocket expenditure and catastrophic health spending on  
38  
39 maternal care in public and private health centres in India: a comparative study of pre and post  
40  
41 national health mission period. *Health Econ Rev* 2017;7(1):31.
- 42  
43 34. Mukherjee S, Singh A, Chandra R. Maternity or catastrophe: a study of household expenditure  
44  
45 on maternal health care in India. *Health* 2013;5(1):109-18.
- 46  
47  
48  
49  
50  
51  
52  
53  
54  
55  
56  
57  
58  
59  
60

- 1  
2  
3 35. Prinja S, Bahuguna P, Gupta R, et al. Coverage and financial risk protection for institutional  
4  
5 delivery: how universal is provision of maternal health care in India? *PloS One*  
6  
7 2015;10(9):e0137315.  
8  
9  
10 36. Akalu T, Guda A, Tamiru M, et al. Examining out of pocket payments for maternal health in  
11  
12 rural Ethiopia: paradox of free health care un-affordability. *Ethiop J Health Dev*  
13  
14 2012;26(1):251-57.  
15  
16 37. Shukla M, Kumar A, Agarwal M, et al. Out-of-pocket expenditure on institutional delivery in  
17  
18 rural Lucknow. *Indian J Comm Health* 2015;2(2): 241-6.  
19  
20  
21 38. Honda A, Randaoharison PG, Matsui M. Affordability of emergency obstetric and neonatal care  
22  
23 at public hospitals in Madagascar. *Reprod Health Matters* 2017;19(37):10-20.  
24  
25  
26 39. Hoque ME, Dasgupta SK, Naznin E, et al. Household coping strategies for delivery and related  
27  
28 healthcare cost: findings from rural Bangladesh. *Trop Med Int Health* 2015; 20(10):1368-75.  
29  
30  
31 40. Goli S, Rammohan A, Moradhvaj. Out-of-pocket expenditure on maternity care for hospital  
32  
33 births in Uttar Pradesh, India. *Health Econ Rev* 2018;8(1):5.  
34  
35 41. Bonu S, Bhushan I, Rani M, et al. Incidence and correlates of 'catastrophic' maternal health care  
36  
37 expenditure in India. *Health Policy Plan* 2009;24(6):445-56.  
38  
39  
40  
41  
42  
43  
44  
45  
46  
47  
48  
49  
50  
51  
52  
53  
54  
55  
56  
57  
58  
59  
60

## List of Tables and Figure

Table 1. Background characteristics of women and their husbands, household information, accessibility of health services and characteristics of ANC and delivery care (n=759)

Table 2. Details of services used and payments of the women for ANC and delivery care (n=759)

Table 3. Impoverishment due to OOP payments for ANC and delivery care (n=757)

Figure 1. Pen's parade of pre- and post-payment income of overall antenatal and delivery care

### Legend

— Pre-payment income      — Post-payment income  
- - - - - Income based poverty line

Table 4. Catastrophic expenditure due to OOP payments for ANC and delivery care (n=757)

Table 5. Determinants of impoverishment and catastrophic expenditure due to OOP payments (n=757)

Table 1. Background characteristics of women and their husbands, household information, accessibility of health services and characteristics of ANC and delivery care (n=759)

| Characteristic                          | n (%)      |
|-----------------------------------------|------------|
| <b>Women's characteristics</b>          |            |
| Place of residence                      |            |
| Urban                                   | 542 (72.4) |
| Rural                                   | 217 (28.6) |
| Age                                     |            |
| 15-24 years                             | 215 (28.3) |
| 25-34 years                             | 376 (49.5) |
| 35-49 years                             | 168 (22.1) |
| Occupation                              |            |
| Housework                               | 539 (71)   |
| Any job                                 | 220 (29)   |
| <b>Husbands' characteristics</b>        |            |
| Education                               |            |
| Primary school and lower                | 242 (31.9) |
| More than primary school                | 517 (68.1) |
| Occupation                              |            |
| Daily wage earner                       | 455 (59.9) |
| Other                                   | 304 (40.1) |
| <b>Household characteristics</b>        |            |
| Number of household members             |            |
| > 5 members                             | 276 (38.4) |
| 3-5 members                             | 483 (63.6) |
| Household annual income *               |            |
| ≤ 1275 USD                              | 83 (10.9)  |
| > 1275 USD                              | 676 (89.1) |
| Household debt                          |            |
| No                                      | 301 (39.7) |
| Yes                                     | 458 (60.3) |
| <b>Accessibility of health services</b> |            |
| Availability of health center           |            |
| No                                      | 123 (16.2) |
| Yes                                     | 636 (83.8) |
| Walking distance in minutes             |            |
| > 30 minutes                            | 76 (10)    |
| ≤ 30 minutes                            | 683 (90)   |
| Type of transportation                  |            |
| Car                                     | 79 (10.4)  |
| Motorcycle                              | 172 (22.7) |
| Walking                                 | 406 (53.3) |

|    |                                                 |            |
|----|-------------------------------------------------|------------|
| 1  |                                                 |            |
| 2  |                                                 |            |
| 3  | Other                                           | 102 (13.4) |
| 4  | <hr/>                                           |            |
| 5  | <b>Characteristics of ANC and delivery care</b> |            |
| 6  | Number of ANC visits                            |            |
| 7  | 1-3                                             | 161 (21.2) |
| 8  | 4-6                                             | 262 (34.5) |
| 9  | > 6                                             | 336 (44.3) |
| 10 | Complication during pregnancy                   |            |
| 11 | No                                              | 645 (85.0) |
| 12 | Yes                                             | 114 (15.0) |
| 13 | Complication during birth                       |            |
| 14 | No                                              | 584 (76.9) |
| 15 | Yes                                             | 175 (23.1) |
| 16 | <hr/>                                           |            |
| 17 |                                                 |            |

18 \* World Bank data bank 2016

Table 2. Details of services used and payments of the women for ANC and delivery care (n=759)

|                                            | Antenatal care          | Delivery care          |
|--------------------------------------------|-------------------------|------------------------|
|                                            | n (%)                   | n (%)                  |
| <b>Health personnel</b>                    |                         |                        |
| Community health personnel                 | 428 (56.4)              | 269 (35.4)             |
| Specialists                                | 171 (22.5)              | 223 (29.4)             |
| Doctors/Nurses                             | 160 (21.1)              | 267 (35.2)             |
| <b>Place of care</b>                       |                         |                        |
| Public facilities                          | 592 (78)                | 493 (65)               |
| Private facilities                         | 167 (22)                | 266 (35)               |
| <b>Affordability (per visit/delivery)</b>  |                         |                        |
| No                                         | 26 (3.4)                | 338 (44.5)             |
| Yes                                        | 733 (96.6)              | 421 (55.5)             |
| <b>Out of pocket payments</b>              |                         |                        |
| No                                         | 186 (24.5)              | 3 (0.4)                |
| Yes                                        | 573 (75.5)              | 756 (99.6)             |
| <b>Categories of health care cost</b>      |                         |                        |
| <b>(per visit/delivery)</b>                | <b>(n=573)</b>          | <b>(n=756)</b>         |
| Hospital cost/Investigation fees           | 0.73 (0-80.8)           | 7.34 (0-1247.6)        |
| Drugs                                      | 0 (0-40.4)              | 0 (0-587.1)            |
| Consultation fees                          | 0 (0-23.9)              | 0 (0-440.3)            |
| Food/Travel/Living cost                    | 0.57 (0-73.4)           | 2.94 (0-1027.4)        |
| Productivity loss                          | 0 (0-117.4)             | 0 (0-1174.2)           |
| Other expenses                             | 0 (0-29.4)              | 0 (0-220.2)            |
| Sum of costs                               | 6.17 (0-862.3)          | 84.4 (0-2305.1)        |
| <b>Total out of pocket payment of care</b> | <b>31.7 (0-12072.2)</b> | <b>84.4 (0-2305.1)</b> |

Table 3. Impoverishment due to OOP payments for ANC and delivery care

|                        | <b>Antenatal care</b> |         |        | <b>Delivery care</b> |        | <b>Overall antenatal and delivery care</b> |        |
|------------------------|-----------------------|---------|--------|----------------------|--------|--------------------------------------------|--------|
|                        | Prepayment            | Post    |        | Post                 |        | Post                                       |        |
|                        |                       | payment | Impact | payment              | Impact | payment                                    | Impact |
| Poverty headcount      | 2.4%                  | 8.1%    | 5.7%   | 3.8%                 | 1.5%   | 10.3%                                      | 7.9%   |
| Normalized poverty gap | 0.01%                 | 1.32%   | 1.31%  | 0.53%                | 0.52%  | 1.44%                                      | 1.43%  |



Table 4. Catastrophic expenditures due to OOP payments for ANC and delivery care

| <b>Catastrophic expenditure</b> | <b>Antenatal care (%)</b> | <b>Delivery care (%)</b> | <b>Overall antenatal and delivery care (%)</b> |
|---------------------------------|---------------------------|--------------------------|------------------------------------------------|
| Incidence                       | 14.0                      | 9.5                      | 22.6                                           |
| Intensity                       | 7.7                       | 2.0                      | 11.2                                           |
| Mean positive gap               | 54.7                      | 20.8                     | 49.6                                           |

Table 5. Determinants of impoverishment and catastrophic expenditure due to OOP payments

| Characteristic                                  | Impoverishment<br>Adjusted OR (95 % CI) | Catastrophic<br>expenditure<br>Adjusted OR (95 % CI) |
|-------------------------------------------------|-----------------------------------------|------------------------------------------------------|
| <b>Woman's occupation</b>                       |                                         |                                                      |
| Any job (reference category)                    | 1                                       | 1                                                    |
| Housework                                       | 2.53 (1.22-5.25)*                       | 2.08 (1.16-3.73)*                                    |
| <b>Number of household members</b>              |                                         |                                                      |
| > 5 members (reference category)                | 1                                       | 1                                                    |
| 3-5 members                                     | 6.03 (2.57-14.15)***                    | 6.75 (3.89-11.70)***                                 |
| <b>Number of ANC visits</b>                     |                                         |                                                      |
| 1-3 (reference category)                        | 1                                       | 1                                                    |
| 4-6                                             | 1.32 (0.41-4.23)                        | 2.32 (1.13-4.75)*                                    |
| > 6                                             | 5.84 (2.20-15.15)***                    | 6.41 (3.40-12.11)***                                 |
| <b>Health personnel for delivery care</b>       |                                         |                                                      |
| Community health personnel (reference category) | 1                                       | 1                                                    |
| Specialists                                     | 3.74 (1.55-9.00)**                      | 3.94 (1.97-7.86)***                                  |
| Doctors/Nurses                                  | 1.96 (0.74-5.19)                        | 2.90 (1.50-7.62)**                                   |
| <b>Place of antenatal care</b>                  |                                         |                                                      |
| Public facilities (reference category)          | 1                                       | 1                                                    |
| Private facilities                              | 2.18 (1.07-4.45)*                       | 2.20 (1.30-3.71)**                                   |
| <b>Place of delivery care</b>                   |                                         |                                                      |
| Public facilities (reference category)          | 1                                       | 1                                                    |
| Private facilities                              | 2.70 (1.23-5.91)*                       |                                                      |

p < 0.05 \*, p < 0.01 \*\*, p < 0.001 \*\*\*

OR : Odds Ratio

CI : Confidence Interval

1  
2  
3  
4  
5  
6  
7  
8  
9  
10  
11  
12  
13  
14  
15  
16  
17  
18  
19  
20  
21  
22  
23  
24  
25  
26  
27  
28  
29  
30  
31  
32  
33  
34  
35  
36  
37  
38  
39  
40  
41  
42  
43  
44  
45  
46  
47  
48  
49  
50  
51  
52  
53  
54  
55  
56  
57  
58  
59  
60

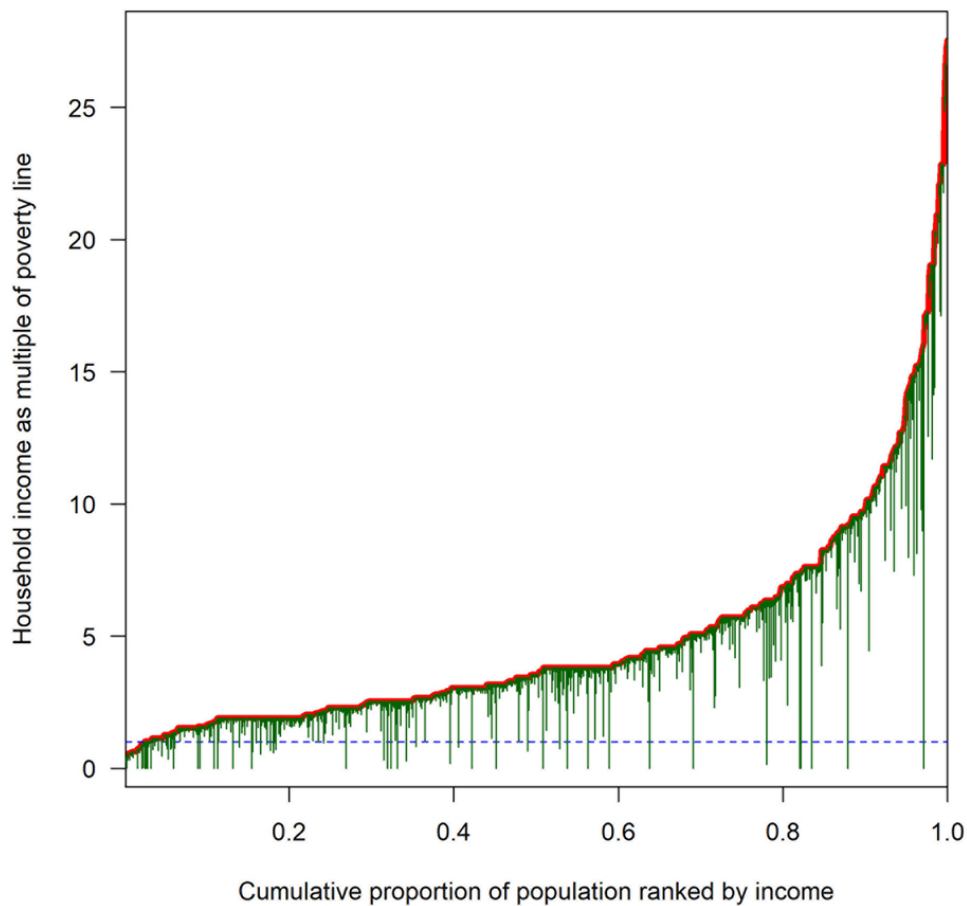

Figure 1. Pen's parade of pre- and post-payment income of overall antenatal and delivery care  
Legend

Pre-payment income Post-payment income  
Income based poverty line

80x81mm (300 x 300 DPI)

**STROBE 2007 (v4) Statement—Checklist of items that should be included in reports of *cross-sectional studies***

| Section/Topic                | Item # | Recommendation                                                                                                                                                                       | Reported on page # |
|------------------------------|--------|--------------------------------------------------------------------------------------------------------------------------------------------------------------------------------------|--------------------|
| <b>Title and abstract</b>    | 1      | (a) Indicate the study's design with a commonly used term in the title or the abstract                                                                                               | 1-2                |
|                              |        | (b) Provide in the abstract an informative and balanced summary of what was done and what was found                                                                                  | 2                  |
| <b>Introduction</b>          |        |                                                                                                                                                                                      |                    |
| Background/rationale         | 2      | Explain the scientific background and rationale for the investigation being reported                                                                                                 | 4-5                |
| Objectives                   | 3      | State specific objectives, including any prespecified hypotheses                                                                                                                     | 5                  |
| <b>Methods</b>               |        |                                                                                                                                                                                      |                    |
| Study design                 | 4      | Present key elements of study design early in the paper                                                                                                                              | 5-6                |
| Setting                      | 5      | Describe the setting, locations, and relevant dates, including periods of recruitment, exposure, follow-up, and data collection                                                      | 5-7                |
| Participants                 | 6      | (a) Give the eligibility criteria, and the sources and methods of selection of participants                                                                                          | 5                  |
| Variables                    | 7      | Clearly define all outcomes, exposures, predictors, potential confounders, and effect modifiers. Give diagnostic criteria, if applicable                                             | 6-7                |
| Data sources/<br>measurement | 8*     | For each variable of interest, give sources of data and details of methods of assessment (measurement). Describe comparability of assessment methods if there is more than one group | 6-7                |
| Bias                         | 9      | Describe any efforts to address potential sources of bias                                                                                                                            | 6-7                |
| Study size                   | 10     | Explain how the study size was arrived at                                                                                                                                            | 5-6                |
| Quantitative variables       | 11     | Explain how quantitative variables were handled in the analyses. If applicable, describe which groupings were chosen and why                                                         | 7-8                |
| Statistical methods          | 12     | (a) Describe all statistical methods, including those used to control for confounding                                                                                                | 7-8                |
|                              |        | (b) Describe any methods used to examine subgroups and interactions                                                                                                                  | N/A                |
|                              |        | (c) Explain how missing data were addressed                                                                                                                                          | N/A                |
|                              |        | (d) If applicable, describe analytical methods taking account of sampling strategy                                                                                                   | 8                  |
|                              |        | (e) Describe any sensitivity analyses                                                                                                                                                | N/A                |
| <b>Results</b>               |        |                                                                                                                                                                                      |                    |

|                          |     |                                                                                                                                                                                                              |       |
|--------------------------|-----|--------------------------------------------------------------------------------------------------------------------------------------------------------------------------------------------------------------|-------|
| Participants             | 13* | (a) Report numbers of individuals at each stage of study—eg numbers potentially eligible, examined for eligibility, confirmed eligible, included in the study, completing follow-up, and analysed            | 9     |
|                          |     | (b) Give reasons for non-participation at each stage                                                                                                                                                         | N/A   |
|                          |     | (c) Consider use of a flow diagram                                                                                                                                                                           | N/A   |
| Descriptive data         | 14* | (a) Give characteristics of study participants (eg demographic, clinical, social) and information on exposures and potential confounders                                                                     | 9     |
|                          |     | (b) Indicate number of participants with missing data for each variable of interest                                                                                                                          | N/A   |
| Outcome data             | 15* | Report numbers of outcome events or summary measures                                                                                                                                                         | 9-10  |
| Main results             | 16  | (a) Give unadjusted estimates and, if applicable, confounder-adjusted estimates and their precision (eg, 95% confidence interval). Make clear which confounders were adjusted for and why they were included | 9-10  |
|                          |     | (b) Report category boundaries when continuous variables were categorized                                                                                                                                    | 10    |
|                          |     | (c) If relevant, consider translating estimates of relative risk into absolute risk for a meaningful time period                                                                                             | N/A   |
| Other analyses           | 17  | Report other analyses done—eg analyses of subgroups and interactions, and sensitivity analyses                                                                                                               | N/A   |
| <b>Discussion</b>        |     |                                                                                                                                                                                                              |       |
| Key results              | 18  | Summarise key results with reference to study objectives                                                                                                                                                     | 10    |
| Limitations              | 19  | Discuss limitations of the study, taking into account sources of potential bias or imprecision. Discuss both direction and magnitude of any potential bias                                                   | 13    |
| Interpretation           | 20  | Give a cautious overall interpretation of results considering objectives, limitations, multiplicity of analyses, results from similar studies, and other relevant evidence                                   | 10-13 |
| Generalisability         | 21  | Discuss the generalisability (external validity) of the study results                                                                                                                                        | 13    |
| <b>Other information</b> |     |                                                                                                                                                                                                              |       |
| Funding                  | 22  | Give the source of funding and the role of the funders for the present study and, if applicable, for the original study on which the present article is based                                                | 14    |

\*Give information separately for cases and controls in case-control studies and, if applicable, for exposed and unexposed groups in cohort and cross-sectional studies.

**Note:** An Explanation and Elaboration article discusses each checklist item and gives methodological background and published examples of transparent reporting. The STROBE checklist is best used in conjunction with this article (freely available on the Web sites of PLoS Medicine at <http://www.plosmedicine.org/>, Annals of Internal Medicine at <http://www.annals.org/>, and Epidemiology at <http://www.epidem.com/>). Information on the STROBE Initiative is available at [www.strobe-statement.org](http://www.strobe-statement.org).

# BMJ Open

## Impoverishment and catastrophic expenditures due to out-of-pocket payments for antenatal and delivery care and their determinants in Yangon region, Myanmar: a cross-sectional study

|                                 |                                                                                                                                                                                                                                                                                                                                                                                                                                                                                                                                                              |
|---------------------------------|--------------------------------------------------------------------------------------------------------------------------------------------------------------------------------------------------------------------------------------------------------------------------------------------------------------------------------------------------------------------------------------------------------------------------------------------------------------------------------------------------------------------------------------------------------------|
| Journal:                        | <i>BMJ Open</i>                                                                                                                                                                                                                                                                                                                                                                                                                                                                                                                                              |
| Manuscript ID                   | bmjopen-2018-022380.R2                                                                                                                                                                                                                                                                                                                                                                                                                                                                                                                                       |
| Article Type:                   | Research                                                                                                                                                                                                                                                                                                                                                                                                                                                                                                                                                     |
| Date Submitted by the Author:   | 17-Jun-2018                                                                                                                                                                                                                                                                                                                                                                                                                                                                                                                                                  |
| Complete List of Authors:       | Myint, Aye Nyein Moe; Ministry of Health and Sports, International Relations Division<br>Liabsuetrakul, Tippawan; Prince of Songkla University, Epidemiology Unit, Faculty of Medicine<br>Htay, Thein Thein; Seisa University, Visiting Professor<br>Wai, Myint Myint; Ministry of Health and Sports, Department of Medical Services (Planning)<br>Sundby, Johanne; University of Oslo, Department of Community and Global Health<br>Bjertness, Espen; University of Oslo, Section for Preventive Medicine and Epidemiology, Institute of Health and Society |
| <b>Primary Subject Heading</b>: | Health policy                                                                                                                                                                                                                                                                                                                                                                                                                                                                                                                                                |
| Secondary Subject Heading:      | Public health, Health economics, Obstetrics and gynaecology                                                                                                                                                                                                                                                                                                                                                                                                                                                                                                  |
| Keywords:                       | Health policy < HEALTH SERVICES ADMINISTRATION & MANAGEMENT, Public health < INFECTIOUS DISEASES, PRIMARY CARE, Health economics < HEALTH SERVICES ADMINISTRATION & MANAGEMENT                                                                                                                                                                                                                                                                                                                                                                               |
|                                 |                                                                                                                                                                                                                                                                                                                                                                                                                                                                                                                                                              |

SCHOLARONE™  
Manuscripts

1  
2  
3 **Impoverishment and catastrophic expenditures due to out-of-pocket payments for**  
4 **antenatal and delivery care and their determinants in Yangon region, Myanmar: a cross-**  
5 **sectional study**  
6  
7  
8  
9

10 Aye Nyein Moe Myint, M.B., B.S, MPH, MA (Pop & RH)<sup>1</sup>, Tippawan Liabsuetrakul, MD,  
11 PhD<sup>2\*</sup>, Thein Thein Htay, M.B., B.S, M.Med.Sc (PH), MHS (Pop & RH)<sup>3</sup>, Myint Myint Wai,  
12 M.B., B.S, M.Med.Sc (PH)<sup>4</sup>, Johanne Sundby, MD, PhD<sup>5</sup>, Espen Bjertness, PhD<sup>6</sup>  
13  
14  
15

16  
17 <sup>1</sup>International Relations Division, Ministry of Health and Sports, Nay Pyi Taw, Myanmar  
18 Email: [anmoemyint@gmail.com](mailto:anmoemyint@gmail.com)  
19

20 <sup>2</sup>Epidemiology Unit, Faculty of Medicine, Prince of Songkla University, Hat Yai, Songkhla,  
21 Thailand  
22

23 <sup>3</sup>Seisa University, Ashigarashimo District, Kanagawa, Japan  
24 Email: [htaythein90@gmail.com](mailto:htaythein90@gmail.com)  
25  
26

27 <sup>4</sup>Department of Medical Services (Planning), Ministry of Health and Sports, Nay Pyi Taw,  
28 Myanmar, Email: [m.m.wai@medisin.uio.no](mailto:m.m.wai@medisin.uio.no)  
29

30 <sup>5</sup>Department of Community and Global Health, University of Oslo, Norway  
31 Email: [johanne.sundby@medisin.uio.no](mailto:johanne.sundby@medisin.uio.no)  
32  
33

34 <sup>6</sup>Department of Community and Global Health, University of Oslo, Norway  
35 Email: [espen.bjertness@medisin.uio.no](mailto:espen.bjertness@medisin.uio.no)  
36  
37  
38

39 \*Correspondence: Tippawan Liabsuetrakul  
40  
41 Epidemiology Unit, Faculty of Medicine  
42 Prince of Songkla University  
43 Hat Yai, Songkhla, 90110, Thailand  
44  
45 Tel: +66 74 451165 Fax: +66 74 429754  
46  
47 E-mail: [ltippawa@yahoo.com](mailto:ltippawa@yahoo.com)  
48  
49  
50

51 Word count: 3,366 words

52 Number of tables: 5

53 Number of figures: 1  
54  
55  
56  
57  
58  
59  
60

**Abstract (297 words)**

**Objectives:** To assess the levels of impoverishment and catastrophic expenditure due to out-of-pocket (OOP) payments for antenatal care (ANC) and delivery care in Yangon Region, Myanmar and explore their determinants.

**Design, setting and participants:** A community-based cross-sectional survey among women giving birth within the past 12 months in Yangon, Myanmar was conducted during October–November 2016 using three-stage cluster sampling.

**Outcome measures:** Poverty impact of out-of-pocket payments measured by the differences between the pre-payment and post-payment headcount ratio and normalized poverty gap was used to assess impoverishment with a poverty threshold of US\$1.9. Out-of-pocket payments exceeding 10% of household annual income were used to assess catastrophic expenditure incidence and intensity. The determinants of impoverishment and catastrophic expenditure due to OOP payments in the utilization of ANC and delivery care were analyzed using multiple logistic regression analysis in a survey package.

**Results:** Of 759 women, out-of-pocket payments were made by 75% of the women for ANC and 99.6% for delivery care. The impact of these payments increased the poverty headcount ratio by 5.7% among women using the ANC services, 1.5% among those using delivery care and 7.9% among those using both ANC and delivery care. Similarly, these payments reflected the incidence of catastrophic expenditure by 14%, 9.5%, and 22.6%, respectively. The determinants of impoverishment and catastrophic expenditure were women's occupation, number of household members, number of ANC visits, and utilization of skilled health personnel and health facilities.

**Conclusions:** Out-of-pocket payment for all ANC and delivery care is a challenge as one-tenth of women using these services become impoverished and one-fourth face catastrophic expenditure after utilization of ANC and delivery care. Policy integration was required to reduce women's



1  
2  
3 financial burden of seeking maternal health services relating social characteristics and move  
4  
5 towards the implementation of universal health coverage in the country.  
6

7 **Key words:** impoverishment, catastrophic payments, out-of-pocket payment, antenatal care,  
8  
9 delivery care  
10

### 11 12 13 14 **Strengths and limitations of this study**

- 15  
16  
17 • This study measured the level of impoverishment and catastrophic expenditure due to  
18  
19 OOP payment for antenatal and delivery care and their determinants in Myanmar, which  
20  
21 is a low-income country.  
22
- 23  
24 • Multistage sampling and the analysis using a survey package applied in this study could  
25  
26 minimize the standard errors and better precision of an estimate of the samples.  
27
- 28  
29 • Potentially direct and indirect expenditures occurred during the utilization of antenatal  
30  
31 and delivery care which presented the real situation were declared.  
32
- 33  
34 • Recall bias might have occurred due to the data collection based on retrospective  
35  
36 interviews.  
37
- 38  
39 • Self-reported household annual income and payments for healthcare services may have  
40  
41 been slightly over- or under-reported.  
42  
43  
44  
45  
46  
47  
48  
49  
50  
51  
52  
53  
54  
55  
56  
57  
58  
59  
60

## Introduction

Worldwide, nearly 830 women die during pregnancy and childbirth every day, with most of them living in poor households having limited proper maternal health care.<sup>1</sup> Increasing utilization of maternal health services is one of the targets of Sustainable Development Goal 3.<sup>2</sup> Poverty or financial problems are the major barrier to accessibility and utilization of antenatal care (ANC) and delivery by skilled birth attendants (SBAs).<sup>3</sup> Even though the economic indicators of most countries in 2015 are better than in earlier years, there are still some countries which face financial barriers leading to worse health outcomes.<sup>2</sup>

Low socioeconomic level or high health care expenditures can lead to financial burdens, either impoverishment or catastrophic expenditure, which use different analyses and thresholds of burden.<sup>4,5</sup> Impoverishment is defined as a non-poor household becomes poor after paying for health care.<sup>6</sup> Catastrophic expenditure is defined as ‘out-of-pocket (OOP) payment for health care that exceeds some estimated proportion of household income or a household’s capacity to pay’.<sup>7</sup> Financial burdens from utilization of maternal health care have been previously reported in some African and Asian countries such as Ghana, Nepal, Bangladesh, and India.<sup>8-11</sup> In Myanmar, OOP payment for health services was high in public and private health facilities and accounted for more than 80% for total health expenditures of the country in 2012.<sup>12</sup> Only one study of OOP payments for maternal health care in Myanmar with percentage of catastrophic health expenditures in Myanmar was found<sup>13</sup>, therefore, the evidence on impoverishment and catastrophic payments of ANC and delivery care and their determinants was limited.

Different countries have introduced different strategies to reduce financial burdens related to accessing necessary health care during pregnancy, child birth and the postpartum period.<sup>14</sup> Providing free maternal health services has been implemented in some low-income countries, but various studies have found low utilization of these services as well as high maternal mortality and

1  
2  
3 morbidity.<sup>9 15 16</sup> A study in Thailand found improvement of maternal health outcomes five years  
4 after the implementation of a universal coverage scheme with health finance reform.<sup>17</sup> Although  
5 some countries have begun to offer free health services or health insurance, the achievements in  
6 terms of reducing financial burdens remains limited.<sup>14</sup>  
7  
8  
9  
10

11  
12 Similarly, Myanmar has begun a program providing free essential drugs and health care  
13 for maternal health services in both public facility-based and primary health care settings in  
14 recent years, but OOP payment while accessing these services has been reported.<sup>12 18 19</sup> In  
15 addition, reports on the actual financial burden in terms of impoverishment and catastrophic  
16 expenditure due to OOP payments are limited.<sup>13</sup> Understanding the determinants of financial  
17 burden in utilizing maternal health services is useful to identify the nature of the OOP payment  
18 situation and whether any determinants are modifiable or require policy improvement.<sup>16 20 21</sup> This  
19 study aimed to assess the levels of impoverishment and catastrophic expenditure due to OOP  
20 payments for ANC and delivery care in Yangon Region, Myanmar and explore the determinants  
21 of impoverishment and catastrophic expenditure.  
22  
23  
24  
25  
26  
27  
28  
29  
30  
31  
32  
33  
34

## 35 **Methods**

### 36 ***Study design, participants and sampling method***

37  
38 This was a community-based cross-sectional survey conducted in Yangon Region of Myanmar  
39 during October and November 2016. According to the 2014 census report, Yangon region had the  
40 largest population among the regions of Myanmar.<sup>22</sup> The study recruited women of reproductive  
41 age (15-49 years) with a history of birth within the previous 12 months who were residents of the  
42 study area. Those who had mental retardation or serious illness were excluded. The required  
43 sample size for the first objective was calculated using the one-proportion formula based on a rate  
44 of 9% of pregnant women with catastrophic expenditure due to OOP payments in utilization of  
45  
46  
47  
48  
49  
50  
51  
52  
53  
54  
55  
56  
57  
58  
59  
60

1  
2  
3 delivery care from a previous study.<sup>13 23</sup> With a precision of 4%, type I error of 1%, non-response  
4 rate of 10% and design effect of 2, at least 750 women were required.  
5  
6

7  
8 Three-stage cluster sampling was used to select eligible persons. For stage one, purposive  
9 selection of two districts among the four districts of Yangon region which covered both urban  
10 and rural populations was done. There were a total of 235 wards and 610 villages in the two  
11 districts. “Wards” and “villages” refer to urban and rural populations, respectively.<sup>24</sup> For stage  
12 two, 16 wards and 16 villages were randomly selected from all of the wards and villages.  
13  
14 Households were selected regarding the number of households and a ratio of urban to rural  
15 population size in the districts considering the proportional probability sampling (PPS). For stage  
16 three, we randomly selected women who had delivered within the past 12 months in each  
17 household from selected wards and villages. For households with more than one eligible woman,  
18 one woman was selected randomly.  
19  
20  
21  
22  
23  
24  
25  
26  
27  
28  
29

### 30 ***Outcome and independent variables***

31  
32  
33 Impoverishment and catastrophic expenditure due to OOP payment for overall ANC and delivery  
34 care were the two main outcome variables in this study. OOP payments included the expenses on  
35 all related healthcare services received during ANC and delivery care, namely hospital  
36 costs/investigation fees, drugs, consultation fees, food/living/transportation payments,  
37 productivity loss and other costs. The OOP payments were calculated for ANC and delivery care  
38 and then summed as total OOP payments for care. OOP payments for ANC were counted as the  
39 sum of all ANC visits. Impoverishment was defined as a situation where a household fell below  
40 the international poverty line (1.9 US dollars in PPP) after paying for maternal health care  
41 services.<sup>6 25</sup> Catastrophic expenditure was defined as OOP payment for maternal health care  
42 services exceeding a threshold of 10% of a household’s annual income.<sup>26</sup>  
43  
44  
45  
46  
47  
48  
49  
50  
51  
52  
53  
54  
55  
56  
57  
58  
59  
60

1  
2  
3 Independent variables included background characteristics of the women and their  
4  
5 husbands and household information, accessibility of health services, characteristics of ANC and  
6  
7 delivery care and details of services provided. Household annual income was classified into  $\leq$   
8  
9 1275 USD or  $>1275$  USD according to GDP per capita of Myanmar from the data of World Bank  
10  
11 2016. The household annual income was recorded in Myanmar kyats and converted to US\$ using  
12  
13 the exchange rate of 1 USD equal to 1362.63 kyats. The information pertaining to accessibility to  
14  
15 health services included availability of a health center, distance as measured in walking minutes  
16  
17 (number of walking minutes from the woman's house to a formal health center) and types of  
18  
19 transportation (women who used any transport to visit a health center). Characteristics of ANC  
20  
21 and delivery care included complications during pregnancy and child birth and number of ANC  
22  
23 visits. Details of services provided included health personnel, place of care, affordability, and  
24  
25 OOP payments.  
26  
27  
28  
29

### 30 ***Data collection***

31  
32 Before the data collection began, 12 research assistants were trained in a two-day training  
33  
34 workshop on how to conduct the interviews and check the information for completeness of data.  
35  
36 The list of women was obtained from the township health departments and local authorities. The  
37  
38 eligible women were visited at their home by the research team at the woman's convenience.  
39  
40 After the study was explained and a consent form signed, the women were interviewed by the  
41  
42 principal investigator and researchers using a pre-tested structured questionnaire in a private area.  
43  
44 Each completed interview was checked promptly and daily for any errors and edited if required.  
45  
46  
47  
48

### 49 ***Statistical analysis***

50  
51 After data collection was complete, EpiData 3.1 was used to record the data in a double entry  
52  
53 system and validate it, and R version 3.4.2 was used for data analysis.<sup>27 28</sup> Categorical variables  
54  
55  
56  
57  
58  
59

1  
2  
3 are presented by frequencies and percentages and continuous variables are shown in median with  
4  
5 interquartile range.  
6

7  
8 The impoverishment was measured by the poverty impact of OOP payment which was  
9  
10 calculated by the differences between the pre-payment and post-payment headcount ratio and  
11  
12 normalized poverty gap.<sup>29 30</sup> We considered the maternal health care services from ANC to  
13  
14 delivery care and the pre-payment period was counted at one point before utilizing the ANC, thus  
15  
16 the pre-payment headcount ratio and normalized poverty gap for ANC and delivery care was the  
17  
18 same value. Pre-payment and post-payment headcount ratio was measured by the proportion of  
19  
20 households having household annual income below the poverty line before and after the women  
21  
22 using the ANC and delivery care, respectively. Normalized poverty gap was calculated by the  
23  
24 depth of OOP payment below the poverty line divided by the poverty line. A Pen's parade graph  
25  
26 between household income as a multiple of the poverty line (y axis) with cumulative proportion  
27  
28 of the population ranked by household income (x axis) was plotted to show the number of non-  
29  
30 poor households which became poor after OOP for pregnancy expenses as indicated by the  
31  
32 vertical lines below the poverty line. Catastrophic expenditure was measured by the incidence  
33  
34 and intensity. Incidence was calculated by the proportion of households who face catastrophic  
35  
36 expenditure due to OOP payments for ANC or delivery care. Intensity was calculated by the  
37  
38 proportion of OOP payments for ANC and delivery care exceeding the 10% threshold of  
39  
40 household's annual income.<sup>26 30</sup>  
41  
42  
43  
44  
45

46  
47 The determinants of the incidences of impoverishment and catastrophic expenditure were  
48  
49 analyzed by multiple logistic regression model using the survey package which the design weight  
50  
51 is considered for a cluster sampling. For analyzing the weighted samples, the first-stage weight  
52  
53 was calculated by the total number of wards and villages divided by the selected number of wards  
54  
55 and villages by each district and the second-stage weight was calculated by the total number of  
56  
57  
58  
59  
60

women divided by the selected number of women in each ward and village by each district. The final stage weight was calculated by multiplying the first stage and second stage weights.<sup>31</sup> The adjusted Odd Ratios (OR) and 95% confidence intervals were presented in the final models with the significance value less than 0.05.

## Results

A total of 759 women were included in this study. More than two-thirds of the women lived in an urban area. Half of the women were aged 24- 35 years and 71% were housewives. More than two-thirds of their husbands had above primary school level education and 60% of them worked as daily wage-earners. Most of the households had less than five household members and 89% of them had an annual household income above 1275 US dollars (USD), and 60.3% of the households had debt. More than 80% of the women said that a health center was available for them to get ANC services within 30 minutes walking distance. Only 21.2% of the women had less than four ANC visits and 15% and 23% of them faced complications during pregnancy and child birth, respectively (Table 1).

Table 2 shows the details of the services used and payments of the women for ANC and delivery care. More than half (56.4%) met community health personnel for ANC followed by specialists (22.5%) and doctors/nurses (21.1%). Similar numbers had delivery by community health personnel (35.4%) or doctors/nurses (35.2%), with the rest by specialists (29.4%). Most of the women used public facilities for ANC (78%) and delivery care (65%). Almost all of the women said that they could afford the cost of each ANC visit and half could afford the cost of delivery care. OOP payments were made by 75% of the women for ANC and by 99.6% for delivery care. Hospital costs/investigation fees were highest for ANC and delivery care. Cost per each ANC visit was lower, but the total cost for all ANC visits was higher, than the total cost of delivery care.

1  
2  
3 Table 3 shows impoverishment due to OOP payments for ANC and delivery care. The  
4 impact on poverty headcount ratio after payment of ANC and delivery care was increased by  
5 7.9% of which 5.7% was for ANC and 1.5% for delivery care. The impact of the normalized  
6 poverty gap was quite similar for ANC (1.3%) and for overall ANC and delivery care (1.4%).  
7  
8 Individual pre-payment and post-payment income for OOP of overall ANC and delivery care is  
9 shown in a Pen's parade graph (Fig 1). Overall OOP payments for ANC and delivery care lead to  
10 some extent of poverty regardless of household income level. Table 4 presents the data on  
11 catastrophic expenditures due to OOP payments for ANC and delivery care. The incidence of  
12 households facing catastrophic expenditure due to OOP payments for ANC, delivery care and  
13 overall ANC and delivery care were 14%, 9.5% and 22.6%, respectively. Intensities of  
14 catastrophic expenditures was found in the utilizing ANC more than delivery care.  
15  
16  
17  
18  
19  
20  
21  
22  
23  
24  
25  
26  
27

28 The determinants of impoverishment and catastrophic expenditure due to OOP payment  
29 for ANC and delivery care are shown in Table 5. Housewives, lower number of household  
30 members and high costs of payment by increasing number of ANC visits, delivery care by  
31 specialists, private health facilities were positively associated with both impoverishment and  
32 catastrophic expenditure for overall ANC and delivery care. Using delivery services from a  
33 private facility with high payment comparing to public facilities was a significant determinant of  
34 impoverishment, but not of catastrophic expenditure.  
35  
36  
37  
38  
39  
40  
41  
42  
43  
44  
45  
46  
47  
48  
49  
50  
51  
52  
53  
54  
55  
56  
57  
58  
59  
60



## Discussion

Approximately one in ten women accessing ANC and one-fourth of women delivering a baby in the study area faced impoverishment or catastrophic expenditure due to OOP payments. Women with a higher number of household members or increased use of ANC visits or who accessed specialists or private services were more likely to face impoverishment or catastrophic expenditure.

Even though free maternal healthcare services are nationally available, at least three-fourths of the women incurred OOP payments, which was the same as a previous study in Myanmar in 2015.<sup>13</sup> This finding was also similar to previous studies from India in 2004<sup>20</sup> and Nigeria in 2010<sup>15</sup>, though the maternal health services considered and the methods of OOP measurement were different. Similarly, a study of three African countries where free delivery care was available found that 90% of the women still paid some amount of OOP for their direct medical expenses.<sup>32</sup> A possible explanation might be due to the existence of high informal payments or some expenses not covering by health insurance.<sup>12 13 15 20 32</sup> The need to turn to OOP payments has been shown to influence the utilization of maternal health services and maternal mortality.<sup>33</sup> Importantly, another study reported that high OOP payments for maternal healthcare also lead households to impoverishment and catastrophic expenditure.<sup>4</sup>

The impoverishment rates in published studies vary depending on the methods used to measure health care expenditures and the poverty line thresholds used for calculating impoverishment. We used the international poverty line in 2011 of US\$ 1.9 per day. A study from Nepal used the international standard from a different year (the international poverty line in 2005 of US\$ 1 per day).<sup>10</sup> The poverty headcount ratio due to the use of institutional delivery reported was 17% which was higher results than us. In contrast, a study in India used their local poverty line and found higher impoverishment due to maternal health care expenditure than the

1  
2  
3 findings of our study.<sup>34</sup> Although Yangon region is the most developed region among the states  
4 and regions of Myanmar, a lot of non-poor households face impoverishment and deep poverty  
5 which could be explained by high maternal healthcare payments without a compensation  
6 scheme.<sup>12 22</sup> Two studies from India using data from 2004 and 2015 found that the impact of the  
7 poverty headcount ratio for maternal healthcare expenditures was lower after introducing free  
8 services for delivery care in 2015.<sup>34 35</sup>

9  
10  
11  
12  
13  
14  
15  
16  
17 Likewise, variations in the incidence of catastrophic expenditure due to maternal health  
18 care expenditures depend on the different maternal services measured, whether household income  
19 or capacity to pay is considered, and the catastrophic expenditure threshold used. One fourth of  
20 women faced catastrophic expenditure due to OOP payment for ANC and delivery care in our  
21 study, which was higher than an earlier study from Myanmar in 2015. This may be because the  
22 previous study measured catastrophic expenditure based only on OOP payments for delivery  
23 care, not ANC, and also only direct and indirect medical costs, not other costs or productivity  
24 loss.<sup>13</sup> Higher incidences of catastrophic expenditure due to OOP were reported in India and  
25 Ethiopia because poorer women were included and all ANC, delivery and postnatal care services  
26 were measured.<sup>34 36</sup> Prior studies from Africa and Bangladesh concluded that more than one third  
27 of women faced catastrophic expenditure due to OOP payments for emergency obstetric care  
28 because they were poor and were required to pay for drugs.<sup>37-39</sup>

29  
30  
31  
32  
33  
34  
35  
36  
37  
38  
39  
40  
41  
42  
43  
44  
45 Woman's occupation, number of household members, utilization of health personnel,  
46 number of ANC visits and place of care were associated with impoverishment and catastrophic  
47 expenditure due to OOP payments. A previous study could not identify a direct association  
48 between occupation and impoverishment and catastrophic expenditure. The significant  
49 association between woman's occupation and impoverishment and catastrophic expenditure  
50 found in our study could be explained by woman reduced working because of their pregnancy  
51  
52  
53  
54  
55  
56  
57  
58  
59  
60

1  
2  
3 leading to lower household income. The number of household members increased the  
4  
5 impoverishment and catastrophic expenditure in our study which was different from a previous  
6  
7 study from India<sup>21</sup> which could be explained by lower sharing financial resources among  
8  
9 household members of our study participants. The finding of higher rates of catastrophic  
10  
11 expenditure in women with a higher number of ANC visits in our study was the same as a study  
12  
13 in India which included women with low economic status.<sup>40</sup> Other studies have found that  
14  
15 women who used a nearby health center or facilities having specialists and private facilities for  
16  
17 ANC and delivery care where health insurance was not available were more likely to have  
18  
19 impoverishment and catastrophic expenditure.<sup>16 20 21 33 40 41</sup>  
20  
21  
22  
23

24 Only one previous study from Myanmar in rural areas of a township in Ayeyarwaddy  
25  
26 region measured catastrophic health expenditure resulting from maternal health care.<sup>13</sup> Our study  
27  
28 included both rural and urban areas of Yangon region, and provides important information on  
29  
30 these factors for policy makers to help them consider financial burdens leading to  
31  
32 impoverishment or catastrophic expenditure.  
33  
34

35 The study had some limitations. First, this was a cross sectional study, thus the causal  
36  
37 relationship between the determinants and level of impoverishment and catastrophic expenditure  
38  
39 due to OOP payments for ANC and delivery care could not be firmly identified. Second,  
40  
41 household annual income and payments for healthcare services were self-reported, therefore,  
42  
43 there may have been over- or under-reporting. Third, the payment of total ANC used the payment  
44  
45 of last ANC visit and then multiplied by the total number of all visits. Fourth, recall bias might  
46  
47 have occurred due to the data gathering through retrospective interviews. However, we included  
48  
49 only women within 12 months of delivery to minimize the recall bias. Finally, the socioeconomic  
50  
51 status of the people in the Yangon region is better than in other regions; therefore, the findings of  
52  
53 this study are not likely representative of the entire country.  
54  
55  
56  
57  
58  
59  
60

## Conclusion

High OOP payments for using ANC and delivery care in the Yangon region of Myanmar resulted in one-tenth of the women becoming impoverished and one-fourth suffering a catastrophic expenditure. Women with no income or those who accessed health facilities with high levels of services provided were more likely to be impoverished or face catastrophic expenses.

## Acknowledgements

This study was a part of the thesis of the first author to fulfill the requirements of a doctoral degree in Epidemiology at Prince of Songkla University. We would like to thank the Regional Department of Yangon for their permission and support in supplying lists of women.

## Contributors

All authors contributed to the concept and design of the study. ANMM and TL participated in data collection, data analysis, interpretation of the data, and preparation of the draft manuscript. TTH, MMW, JS and EB also assisted with interpretation of the data and commented on the draft MS. All authors read and approved the final manuscript.

## Competing interests

The authors declare no competing interests.

## Funding

The study was supported by the Norwegian Programme for Capacity Development in Higher Education and Research for Development (NORHED) through the project entitled “Health and Sustainable Development in Myanmar – Competence Building in Public Health (MY-NORTH)”.

## Ethical approval

Ethical clearances for the study were obtained from the Ethical Review Committee of Prince of Songkla University, Thailand, the Department of Medical Research, Myanmar and the Norwegian National Research Ethics Committee (NSD), Norway.

### **Patient and Public Involvement**

Women and household members or the public were not involved in the development of the research questions, design of the study or recruitment. The results are not directly disseminated to study participants.

### **Data sharing statement**

No additional data available. Original data without identity can be provided on request after the Ethical Review Committee of Prince of Songkla University are informed and approved.

## References

1. WHO. *WHO fact sheet on maternal mortality*. Geneva: World Health Organization, 2016.
2. WHO. *Health in 2015: from MDGs, millennium development goals to SDGs, sustainable development goals*. Geneva: World Health Organization 2015.
3. UNICEF. *Monitoring the situation of child and women*. New York: United Nations International Children's Emergency Fund, 2015.
4. Saksena P, Hsu J, Evans DB. Financial risk protection and universal health coverage: evidence and measurement challenges. *PLoS Med* 2014;11:e1001701.
5. WHO, World Bank. *Tracking universal health coverage*. Geneva: World Health Organization, 2015.
6. WHO. *Distribution of health payments and catastrophic expenditures methodology*. Geneva: World Health Organization, 2005.
7. Pal R. Measuring incidence of catastrophic out-of-pocket health expenditure: with application to India. *Int J Health Care Finance Econ* 2012;12:63-85.
8. Skordis-Worrall J, Pace N, Bapat U, et al. Maternal and neonatal health expenditure in mumbai slums (India): a cross sectional study. *BMC Public Health* 2011;11:150.
9. Dalaba MA, Akweongo P, Aborigo RA, et al. Cost to households in treating maternal complications in northern Ghana: a cross sectional study. *BMC Health Servs Res* 2015;15:34.
10. Gartoulla P, Liabsuetrakul T, Chongsuvivatwong V, et al. Ability to pay and impoverishment among women who give birth at a university hospital in kathmandu, Nepal. *Glob Public Health* 2012;7:1145-56.
11. Rahman M, Rob U, Noor FR, et al. Out-of-pocket expenses for maternity care in rural Bangladesh: a public-private comparison. *Int Q Community Health Educ* 2012;33:143-57.

12. World Bank. *Myanmar: public expenditure review 2015*. Washington D.C: World Bank, 2015.
13. Han WW, Saw S, Einda HMT, et al. Out of pocket expenditure on maternal and child health care services among rural households in dedaye township, Myanmar. *Myanmar Med J* 2017;59(2):37-49.
14. Borghi J, Ensor T, Somanathan A, et al. Mobilising financial resources for maternal health. *Lancet* 2006;368:1457-65.
15. Kalu-Umeh NN, Sambo MN, Idris SH, et al. Costs and patterns of financing maternal health care services in rural communities in northern Nigeria: evidence for designing national fee exemption policy. *Int J MCH AIDS* 2013;2:163-72.
16. Goli S, Moradvaj, Rammohan A, et al. High spending on maternity care in India: what are the factors explaining it? *PloS One* 2016;11:e0156437.
17. Limwattananon S, Tangcharoensathien V, Prakongsai P. Equity in maternal and child health in Thailand. *Bull World Health Organ* 2010;88(6):420-7. doi: 10.2471/BLT.09.068791
18. Latt NN, Cho SM, Htun NMM, et al. Healthcare in Myanmar. *Nagoya J Med Sci* 2016;78:123-34.
19. Myanmar Ministry of Health and Sports. *Myanmar national health plan 2017 - 2021*. Nay Pyi Taw: Ministry of Health and Sports, 2016.
20. Kerketta S. Out of pocket expenditure on utilization of ante-natal and delivery care services in India: analysis based on NSSO 60th round. *Int J Reprod Contracept Obstet Gynecol* 2015;4:1704-9.
21. Leone T, James KS, Padmadas SS. The burden of maternal health care expenditure in India: multilevel analysis of national data. *Matern Child Health J* 2013;17:1622-30.

- 1  
2  
3 22. Myanmar Ministry of Immigration and Population. *Yangon region census report*. Nay Pyi  
4  
5 Taw: Ministry of Immigration and Population, 2014.  
6
- 7 23. WHO. *Sample size determination in health studies \_practical manual*. Geneva: World Health  
8  
9 Organization, 1991.  
10
- 11 24. Myanmar Ministry of Home Affairs. *Myanmar administrative structure*. Nay Pyi Taw:  
12  
13 Ministry of Home Affairs, 2012.  
14
- 15 25. World Bank. *Country poverty and equity brief, Myanmar*. Washington D.C: World Bank,  
16  
17 2018. Available from <http://povertydata.worldbank.org/poverty/country/MMR>  
18  
19
- 20 26. O'Donnell O, Doorslaer Ev, Wagstaff A, et al. *Analyzing health equity using household*  
21  
22 *survey data: a guide to techniques and their implementation*. Washington, D.C.: World Bank  
23  
24 2008.  
25
- 26 27. R: a language and environment for statistical computing. R foundation for statistical  
27  
28 computing . 1.0.153 version. Vienna, Austria, 2015.  
29
- 30 28. Lauritsen JM & Bruus M. EpiData 3.1. A comprehensive tool for validated entry and  
31  
32 documentation of data. The EpiData Association, Odense, Denmark, 2003-2005.  
33
- 34 29. Wagstaff A. *Measuring financial protection in health*. Washington D.C., 2008.  
35
- 36 30. Wagstaff A, Doorslaer Ev. Catastrophe and impoverishment in paying for health care: with  
37  
38 applications to Vietnam 1993--1998. *Health Econ* 2003;12:921-34.  
39
- 40 31. Lumley T. *Complex sampling and R*. A John Wiley & Sons, Inc., Washington D.C, 2009.  
41
- 42 32. Perkins M, Brazier E, Themmen E, et al. Out-of-pocket costs for facility-based maternity care  
43  
44 in three African countries. *Health Policy Plan* 2009;24:289-300.  
45
- 46 33. Mohanty SK, Kastor A. Out-of-pocket expenditure and catastrophic health spending on  
47  
48 maternal care in public and private health centres in India: a comparative study of pre and post  
49  
50 national health mission period. *Health Econ Rev* 2017;7:31.  
51  
52  
53  
54  
55  
56  
57  
58  
59  
60



- 1  
2  
3 34. Mukherjee S, Singh A, Chandra R. Maternity or catastrophe: a study of household  
4  
5 expenditure on maternal health care in India. *Health* 2013;5:109-18.  
6  
7  
8 35. Prinja S, Bahuguna P, Gupta R, et al. Coverage and financial risk protection for institutional  
9  
10 delivery: how universal is provision of maternal health care in India? *PloS One*  
11  
12 2015;10:e0137315.  
13  
14  
15 36. Akalu T, Guda A, Tamiru M, et al. Examining out of pocket payments for maternal health in  
16  
17 rural Ethiopia: paradox of free health care un-affordability. *Ethiop J Health Dev* 2012;26:251-  
18  
19 7.  
20  
21  
22 37. Shukla M, Kumar A, Agarwal M, et al. Out-of-pocket expenditure on institutional delivery in  
23  
24 rural Lucknow. *Indian J Comm Health* 2015;27: 241-6.  
25  
26  
27 38. Honda A, Randaoharison PG, Matsui M. Affordability of emergency obstetric and neonatal  
28  
29 care at public hospitals in Madagascar. *Reprod Health Matters* 2017;19:10-20.  
30  
31  
32 39. Hoque ME, Dasgupta SK, Naznin E, et al. Household coping strategies for delivery and  
33  
34 related healthcare cost: findings from rural Bangladesh. *Trop Med Int Health* 2015;20:1368-  
35  
36 75.  
37  
38  
39 40. Goli S, Rammohan A, Moradhvaj. Out-of-pocket expenditure on maternity care for hospital  
40  
41 births in uttar pradesh, India. *Health Econ Rev* 2018;8:5.  
42  
43  
44 41. Bonu S, Bhushan I, Rani M, et al. Incidence and correlates of 'catastrophic' maternal health  
45  
46 care expenditure in India. *Health Policy Plan* 2009;24:445-56.  
47  
48  
49  
50  
51  
52  
53  
54  
55  
56  
57  
58  
59  
60

## List of Tables and Figure

Table 1. Background characteristics of women and their husbands, household information, accessibility of health services and characteristics of ANC and delivery care (n=759)

Table 2. Details of services used and payments of the women for ANC and delivery care (n=759)

Table 3. Impoverishment due to OOP payments for ANC and delivery care (n=757)

Figure 1. Pen's parade of pre- and post-payment income of overall antenatal and delivery care

Legend

— Pre-payment income      — Post-payment income  
- - - Income based poverty line

Table 4. Catastrophic expenditure due to OOP payments for ANC and delivery care (n=757)

Table 5. Determinants of impoverishment and catastrophic expenditure due to OOP payments (n=757)

Table 1. Background characteristics of women and their husbands, household information, accessibility of health services and characteristics of ANC and delivery care (n=759)

| Characteristic                          | n (%)      |
|-----------------------------------------|------------|
| <b>Women's characteristics</b>          |            |
| Place of residence                      |            |
| Urban                                   | 542 (72.4) |
| Rural                                   | 217 (28.6) |
| Age                                     |            |
| 15-24 years                             | 215 (28.3) |
| 25-34 years                             | 376 (49.5) |
| 35-49 years                             | 168 (22.1) |
| Occupation                              |            |
| Housework                               | 539 (71)   |
| Any job                                 | 220 (29)   |
| <b>Husbands' characteristics</b>        |            |
| Education                               |            |
| Primary school and lower                | 242 (31.9) |
| More than primary school                | 517 (68.1) |
| Occupation                              |            |
| Daily wage earner                       | 455 (59.9) |
| Other                                   | 304 (40.1) |
| <b>Household characteristics</b>        |            |
| Number of household members             |            |
| > 5 members                             | 276 (38.4) |
| 3-5 members                             | 483 (63.6) |
| Household annual income                 |            |
| ≤ 1275 USD                              | 83 (10.9)  |
| > 1275 USD                              | 676 (89.1) |
| Household debt                          |            |
| No                                      | 301 (39.7) |
| Yes                                     | 458 (60.3) |
| <b>Accessibility of health services</b> |            |
| Availability of health center           |            |
| No                                      | 123 (16.2) |
| Yes                                     | 636 (83.8) |
| Walking distance in minutes             |            |
| > 30 minutes                            | 76 (10)    |
| ≤ 30 minutes                            | 683 (90)   |
| Type of transportation                  |            |
| Car                                     | 79 (10.4)  |
| Motorcycle                              | 172 (22.7) |

|         |            |
|---------|------------|
| Walking | 406 (53.3) |
| Other   | 102 (13.4) |

---

**Characteristics of ANC and delivery care**

## Number of ANC visits

|     |            |
|-----|------------|
| 1-3 | 161 (21.2) |
| 4-6 | 262 (34.5) |
| > 6 | 336 (44.3) |

## Complication during pregnancy

|     |            |
|-----|------------|
| No  | 645 (85.0) |
| Yes | 114 (15.0) |

## Complication during birth

|     |            |
|-----|------------|
| No  | 584 (76.9) |
| Yes | 175 (23.1) |

---

Table 2. Details of services used and payments of the women for ANC and delivery care (n=759)

|                                            | <b>Antenatal care</b>   | <b>Delivery care</b>   |
|--------------------------------------------|-------------------------|------------------------|
|                                            | <b>n (%)</b>            | <b>n (%)</b>           |
| <b>Health personnel</b>                    |                         |                        |
| Community health personnel                 | 428 (56.4)              | 269 (35.4)             |
| Specialists                                | 171 (22.5)              | 223 (29.4)             |
| Doctors/Nurses                             | 160 (21.1)              | 267 (35.2)             |
| <b>Place of care</b>                       |                         |                        |
| Public facilities                          | 592 (78)                | 493 (65)               |
| Private facilities                         | 167 (22)                | 266 (35)               |
| <b>Affordability (per visit/delivery)</b>  |                         |                        |
| No                                         | 26 (3.4)                | 338 (44.5)             |
| Yes                                        | 733 (96.6)              | 421 (55.5)             |
| <b>Out-of-pocket payments</b>              |                         |                        |
| No                                         | 186 (24.5)              | 3 (0.4)                |
| Yes                                        | 573 (75.5)              | 756 (99.6)             |
| <b>Categories of health care cost</b>      |                         |                        |
| <b>(per visit/delivery)</b>                | <b>(n=573)</b>          | <b>(n=756)</b>         |
| Hospital cost/Investigation fees           | 0.73 (0-80.8)           | 7.34 (0-1247.6)        |
| Drugs                                      | 0 (0-40.4)              | 0 (0-587.1)            |
| Consultation fees                          | 0 (0-23.9)              | 0 (0-440.3)            |
| Food/Travel/Living cost                    | 0.57 (0-73.4)           | 2.94 (0-1027.4)        |
| Productivity loss                          | 0 (0-117.4)             | 0 (0-1174.2)           |
| Other expenses                             | 0 (0-29.4)              | 0 (0-220.2)            |
| Sum of costs                               | 6.17 (0-862.3)          | 84.4 (0-2305.1)        |
| <b>Total out-of-pocket payment of care</b> | <b>31.7 (0-12072.2)</b> | <b>84.4 (0-2305.1)</b> |

Table 3. Impoverishment due to OOP payments for ANC and delivery care

|                         | <b>Before utilizing</b>     |                 | <b>Antenatal care</b> |            | <b>Delivery care</b> |            | <b>Overall antenatal and delivery care</b> |            |
|-------------------------|-----------------------------|-----------------|-----------------------|------------|----------------------|------------|--------------------------------------------|------------|
|                         | <b>ANC or delivery care</b> | Post-           |                       | Post-      |                      | Post-      |                                            |            |
|                         |                             | Pre-payment (%) | payment (%)           | Impact (%) | payment (%)          | Impact (%) | payment (%)                                | Impact (%) |
| Poverty headcount ratio | 2.4                         | 8.1             | 5.7                   | 3.8        | 1.5                  | 10.3       | 7.9                                        |            |
| Normalized poverty gap  | 0.01                        | 1.32            | 1.31                  | 0.53       | 0.52                 | 1.44       | 1.43                                       |            |

Table 4. Catastrophic expenditures due to OOP payments for ANC and delivery care

| Catastrophic expenditure | Overall antenatal and delivery care |               |               |
|--------------------------|-------------------------------------|---------------|---------------|
|                          | Antenatal care                      | Delivery care | delivery care |
| Incidence (%)            | 14.0                                | 9.5           | 22.6          |
| Intensity (%)            | 7.7                                 | 2.0           | 11.2          |

For peer review only

Table 5. Determinants of impoverishment and catastrophic expenditure due to OOP payments

| Characteristic                                  | Impoverishment<br>Adjusted OR (95 % CI) | Catastrophic<br>expenditure<br>Adjusted OR (95 % CI) |
|-------------------------------------------------|-----------------------------------------|------------------------------------------------------|
| <b>Woman's occupation</b>                       |                                         |                                                      |
| Any job (reference category)                    | 1                                       | 1                                                    |
| Housework                                       | 2.53 (1.22-5.25)*                       | 2.08 (1.16-3.73)*                                    |
| <b>Number of household members</b>              |                                         |                                                      |
| > 5 members (reference category)                | 1                                       | 1                                                    |
| 3-5 members                                     | 6.03 (2.57-14.15)***                    | 6.75 (3.89-11.70)***                                 |
| <b>Number of ANC visits</b>                     |                                         |                                                      |
| 1-3 (reference category)                        | 1                                       | 1                                                    |
| 4-6                                             | 1.32 (0.41-4.23)                        | 2.32 (1.13-4.75)*                                    |
| > 6                                             | 5.84 (2.20-15.15)***                    | 6.41 (3.40-12.11)***                                 |
| <b>Health personnel for delivery care</b>       |                                         |                                                      |
| Community health personnel (reference category) | 1                                       | 1                                                    |
| Specialists                                     | 3.74 (1.55-9.00)**                      | 3.94 (1.97-7.86)***                                  |
| Doctors/Nurses                                  | 1.96 (0.74-5.19)                        | 2.90 (1.50-7.62)**                                   |
| <b>Place of antenatal care</b>                  |                                         |                                                      |
| Public facilities (reference category)          | 1                                       | 1                                                    |
| Private facilities                              | 2.18 (1.07-4.45)*                       | 2.20 (1.30-3.71)**                                   |
| <b>Place of delivery care</b>                   |                                         |                                                      |
| Public facilities (reference category)          | 1                                       | 1                                                    |
| Private facilities                              | 2.70 (1.23-5.91)*                       |                                                      |

p < 0.05 \*, p < 0.01 \*\*, p < 0.001 \*\*\*

OR : Odds Ratio

CI : Confidence Interval



1  
2  
3  
4  
5  
6  
7  
8  
9  
10  
11  
12  
13  
14  
15  
16  
17  
18  
19  
20  
21  
22  
23  
24  
25  
26  
27  
28  
29  
30  
31  
32  
33  
34  
35  
36  
37  
38  
39  
40  
41  
42  
43  
44  
45  
46  
47  
48  
49  
50  
51  
52  
53  
54  
55  
56  
57  
58  
59  
60

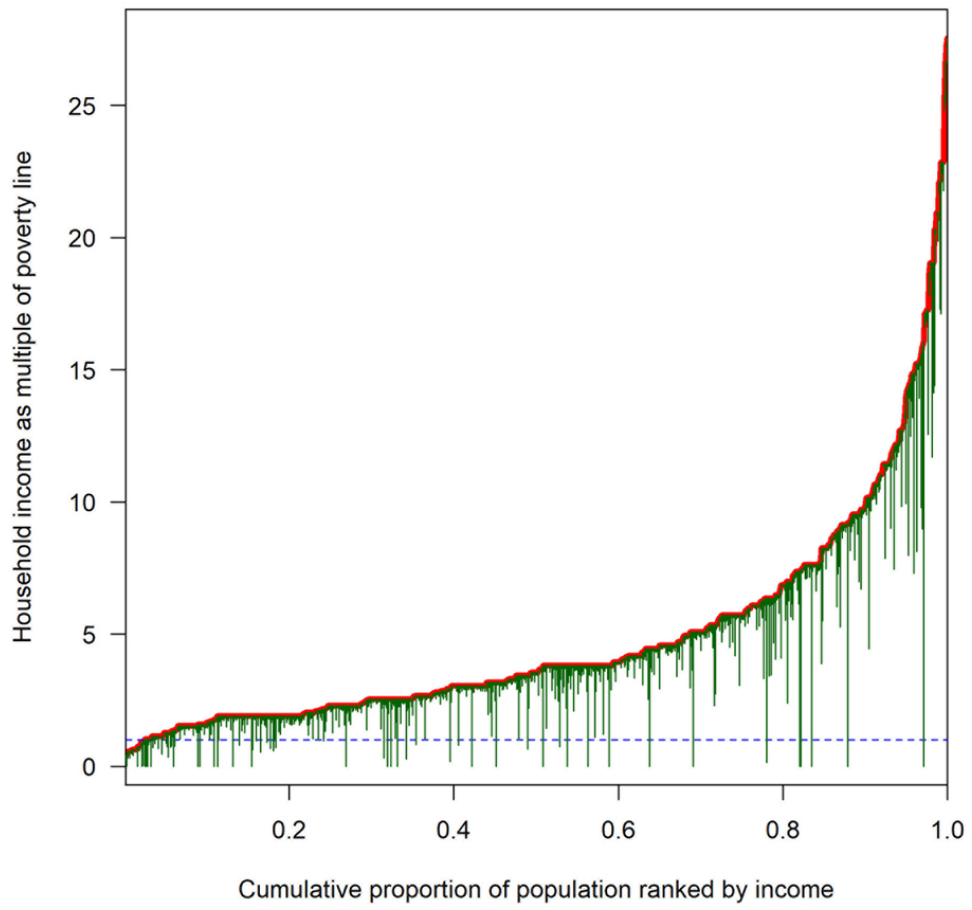

Figure 1. Pen's parade of pre- and post-payment income of overall antenatal and delivery care  
Legend

Pre-payment income Post-payment income  
Income based poverty line

80x81mm (300 x 300 DPI)

**STROBE 2007 (v4) Statement—Checklist of items that should be included in reports of *cross-sectional studies***

| Section/Topic                | Item # | Recommendation                                                                                                                                                                       | Reported on page # |
|------------------------------|--------|--------------------------------------------------------------------------------------------------------------------------------------------------------------------------------------|--------------------|
| Title and abstract           | 1      | (a) Indicate the study's design with a commonly used term in the title or the abstract                                                                                               | 1-2                |
|                              |        | (b) Provide in the abstract an informative and balanced summary of what was done and what was found                                                                                  | 2-3                |
| <b>Introduction</b>          |        |                                                                                                                                                                                      |                    |
| Background/rationale         | 2      | Explain the scientific background and rationale for the investigation being reported                                                                                                 | 4-5                |
| Objectives                   | 3      | State specific objectives, including any prespecified hypotheses                                                                                                                     | 5                  |
| <b>Methods</b>               |        |                                                                                                                                                                                      |                    |
| Study design                 | 4      | Present key elements of study design early in the paper                                                                                                                              | 5                  |
| Setting                      | 5      | Describe the setting, locations, and relevant dates, including periods of recruitment, exposure, follow-up, and data collection                                                      | 5-8                |
| Participants                 | 6      | (a) Give the eligibility criteria, and the sources and methods of selection of participants                                                                                          | 5-6                |
| Variables                    | 7      | Clearly define all outcomes, exposures, predictors, potential confounders, and effect modifiers. Give diagnostic criteria, if applicable                                             | 6-7                |
| Data sources/<br>measurement | 8*     | For each variable of interest, give sources of data and details of methods of assessment (measurement). Describe comparability of assessment methods if there is more than one group | 6-9                |
| Bias                         | 9      | Describe any efforts to address potential sources of bias                                                                                                                            | 6-7                |
| Study size                   | 10     | Explain how the study size was arrived at                                                                                                                                            | 6                  |
| Quantitative variables       | 11     | Explain how quantitative variables were handled in the analyses. If applicable, describe which groupings were chosen and why                                                         | 7-9                |
| Statistical methods          | 12     | (a) Describe all statistical methods, including those used to control for confounding                                                                                                | 8-9                |
|                              |        | (b) Describe any methods used to examine subgroups and interactions                                                                                                                  | N/A                |
|                              |        | (c) Explain how missing data were addressed                                                                                                                                          | N/A                |
|                              |        | (d) If applicable, describe analytical methods taking account of sampling strategy                                                                                                   | 8-9                |
|                              |        | (e) Describe any sensitivity analyses                                                                                                                                                | N/A                |
| <b>Results</b>               |        |                                                                                                                                                                                      |                    |

|                          |     |                                                                                                                                                                                                              |       |
|--------------------------|-----|--------------------------------------------------------------------------------------------------------------------------------------------------------------------------------------------------------------|-------|
| Participants             | 13* | (a) Report numbers of individuals at each stage of study—eg numbers potentially eligible, examined for eligibility, confirmed eligible, included in the study, completing follow-up, and analysed            | 9     |
|                          |     | (b) Give reasons for non-participation at each stage                                                                                                                                                         | N/A   |
|                          |     | (c) Consider use of a flow diagram                                                                                                                                                                           | N/A   |
| Descriptive data         | 14* | (a) Give characteristics of study participants (eg demographic, clinical, social) and information on exposures and potential confounders                                                                     | 9     |
|                          |     | (b) Indicate number of participants with missing data for each variable of interest                                                                                                                          | N/A   |
| Outcome data             | 15* | Report numbers of outcome events or summary measures                                                                                                                                                         | 9-10  |
| Main results             | 16  | (a) Give unadjusted estimates and, if applicable, confounder-adjusted estimates and their precision (eg, 95% confidence interval). Make clear which confounders were adjusted for and why they were included | 9-10  |
|                          |     | (b) Report category boundaries when continuous variables were categorized                                                                                                                                    | 9-10  |
|                          |     | (c) If relevant, consider translating estimates of relative risk into absolute risk for a meaningful time period                                                                                             | N/A   |
| Other analyses           | 17  | Report other analyses done—eg analyses of subgroups and interactions, and sensitivity analyses                                                                                                               | N/A   |
| <b>Discussion</b>        |     |                                                                                                                                                                                                              |       |
| Key results              | 18  | Summarise key results with reference to study objectives                                                                                                                                                     | 11    |
| Limitations              | 19  | Discuss limitations of the study, taking into account sources of potential bias or imprecision. Discuss both direction and magnitude of any potential bias                                                   | 13    |
| Interpretation           | 20  | Give a cautious overall interpretation of results considering objectives, limitations, multiplicity of analyses, results from similar studies, and other relevant evidence                                   | 11-13 |
| Generalisability         | 21  | Discuss the generalisability (external validity) of the study results                                                                                                                                        | 13    |
| <b>Other information</b> |     |                                                                                                                                                                                                              |       |
| Funding                  | 22  | Give the source of funding and the role of the funders for the present study and, if applicable, for the original study on which the present article is based                                                | 14    |

\*Give information separately for cases and controls in case-control studies and, if applicable, for exposed and unexposed groups in cohort and cross-sectional studies.

**Note:** An Explanation and Elaboration article discusses each checklist item and gives methodological background and published examples of transparent reporting. The STROBE checklist is best used in conjunction with this article (freely available on the Web sites of PLoS Medicine at <http://www.plosmedicine.org/>, Annals of Internal Medicine at <http://www.annals.org/>, and Epidemiology at <http://www.epidem.com/>). Information on the STROBE Initiative is available at [www.strobe-statement.org](http://www.strobe-statement.org).

# BMJ Open

## Impoverishment and catastrophic expenditures due to out-of-pocket payments for antenatal and delivery care in Yangon region, Myanmar: a cross-sectional study

|                                 |                                                                                                                                                                                                                                                                                                                                                                                                                                                                                                                                                              |
|---------------------------------|--------------------------------------------------------------------------------------------------------------------------------------------------------------------------------------------------------------------------------------------------------------------------------------------------------------------------------------------------------------------------------------------------------------------------------------------------------------------------------------------------------------------------------------------------------------|
| Journal:                        | <i>BMJ Open</i>                                                                                                                                                                                                                                                                                                                                                                                                                                                                                                                                              |
| Manuscript ID                   | bmjopen-2018-022380.R3                                                                                                                                                                                                                                                                                                                                                                                                                                                                                                                                       |
| Article Type:                   | Research                                                                                                                                                                                                                                                                                                                                                                                                                                                                                                                                                     |
| Date Submitted by the Author:   | 15-Aug-2018                                                                                                                                                                                                                                                                                                                                                                                                                                                                                                                                                  |
| Complete List of Authors:       | Myint, Aye Nyein Moe; Ministry of Health and Sports, International Relations Division<br>Liabsuetrakul, Tippawan; Prince of Songkla University, Epidemiology Unit, Faculty of Medicine<br>Htay, Thein Thein; Seisa University, Visiting Professor<br>Wai, Myint Myint; Ministry of Health and Sports, Department of Medical Services (Planning)<br>Sundby, Johanne; University of Oslo, Department of Community and Global Health<br>Bjertness, Espen; University of Oslo, Section for Preventive Medicine and Epidemiology, Institute of Health and Society |
| <b>Primary Subject Heading</b>: | Health policy                                                                                                                                                                                                                                                                                                                                                                                                                                                                                                                                                |
| Secondary Subject Heading:      | Public health, Health economics, Obstetrics and gynaecology                                                                                                                                                                                                                                                                                                                                                                                                                                                                                                  |
| Keywords:                       | Health policy < HEALTH SERVICES ADMINISTRATION & MANAGEMENT, Public health < INFECTIOUS DISEASES, PRIMARY CARE, Health economics < HEALTH SERVICES ADMINISTRATION & MANAGEMENT                                                                                                                                                                                                                                                                                                                                                                               |
|                                 |                                                                                                                                                                                                                                                                                                                                                                                                                                                                                                                                                              |

SCHOLARONE™  
Manuscripts

1  
2  
3 **Impoverishment and catastrophic expenditures due to out-of-pocket payments for**  
4 **antenatal and delivery care in Yangon region, Myanmar: a cross-sectional study**  
5

6  
7 Aye Nyein Moe Myint, M.B., B.S, MPH, MA (Pop & RH)<sup>1</sup>, Tippawan Liabsuetrakul, MD,  
8 PhD<sup>2\*</sup>, Thein Thein Htay, M.B., B.S, M.Med.Sc (PH), MHS (Pop & RH)<sup>3</sup>, Myint Myint Wai,  
9 M.B., B.S, M.Med.Sc (PH)<sup>4</sup>, Johanne Sundby, MD, PhD<sup>5</sup>, Espen Bjertness, PhD<sup>6</sup>  
10  
11  
12  
13

14 <sup>1</sup>International Relations Division, Ministry of Health and Sports, Nay Pyi Taw, Myanmar

15 Email: [anmoemyint@gmail.com](mailto:anmoemyint@gmail.com)

16 <sup>2</sup>Epidemiology Unit, Faculty of Medicine, Prince of Songkla University, Hat Yai, Songkhla,  
17 Thailand  
18

19 <sup>3</sup>Seisa University, Ashigarashimo District, Kanagawa, Japan

20 Email: [htaythein90@gmail.com](mailto:htaythein90@gmail.com)

21 <sup>4</sup>Department of Medical Services (Planning), Ministry of Health and Sports, Nay Pyi Taw,  
22 Myanmar, Email: [m.m.wai@medisin.uio.no](mailto:m.m.wai@medisin.uio.no)  
23

24 <sup>5</sup>Department of Community and Global Health, University of Oslo, Norway

25 Email: [johanne.sundby@medisin.uio.no](mailto:johanne.sundby@medisin.uio.no)

26 <sup>6</sup>Department of Community and Global Health, University of Oslo, Norway

27 Email: [espen.bjertness@medisin.uio.no](mailto:espen.bjertness@medisin.uio.no)  
28  
29  
30  
31  
32  
33  
34  
35  
36

37 \*Correspondence: Tippawan Liabsuetrakul

38 Epidemiology Unit, Faculty of Medicine

39 Prince of Songkla University

40 Hat Yai, Songkhla, 90110, Thailand

41 Tel: +66 74 451165 Fax: +66 74 429754

42 E-mail: [ltippawa@yahoo.com](mailto:ltippawa@yahoo.com)  
43  
44  
45  
46  
47  
48

49 Word count: 3,318 words

50 Number of tables: 5

51 Number of figures: 1  
52  
53  
54  
55  
56  
57  
58  
59  
60

**Abstract (249 words)**

**Objectives:** (i) To assess the levels of impoverishment and catastrophic expenditure due to out-of-pocket (OOP) payments for antenatal care (ANC) and delivery care in Yangon Region, Myanmar; and (ii) to explore the determinants of impoverishment and catastrophic expenditure.

**Design, setting and participants:** A community-based cross-sectional survey among women giving birth within the past 12 months in Yangon, Myanmar was conducted during October–November 2016 using three-stage cluster sampling procedure.

**Outcome measures:** Poverty headcount ratio, normalized poverty gap and catastrophic expenditure incidence due to OOP payments in the utilization of ANC and delivery care were the main outcomes. The determinants of impoverishment and catastrophic expenditure were analyzed using multiple logistic regression analysis.

**Results:** Of 759 women, out-of-pocket payments were made by 75% of the women for ANC and 99.6% for delivery care. The changes of poverty headcount ratio after payments were shown by 4.3% among women using the ANC services, 1.3% among those using delivery care and 6.1% among those using both ANC and delivery care. The incidences of catastrophic expenditure after payments were found by 12% for ANC, 9.1% for delivery care, and 20.9% for both ANC and delivery care. The determinants of impoverishment and catastrophic expenditure were women's occupation, number of household members, number of ANC visits, and utilization of skilled health personnel and health facilities.

**Conclusions:** Out-of-pocket payment for all ANC and delivery care is a challenge as one-tenth of women using these services become impoverished and one-fourth face catastrophic expenditure after utilization of ANC and delivery care.

**Keywords:** impoverishment, catastrophic expenditure, out-of-pocket payment, antenatal care, delivery care

### Strengths

- This study measured impacts of OOP payments for antenatal and delivery care on levels of impoverishment and catastrophic expenditure in Myanmar, one of the few studies on this issue in a low-income country. Other determinants of impoverishment and catastrophic expenditure were also analyzed using logistic regression and found to be important.
- Multistage sampling design and the use of adjusted standard errors in the analysis minimized the bias and provided more precise estimates.
- The factors related in terms of social determinants of OOP payments for antenatal and delivery care were collected in this study.

### Limitations

- The data on the expenditure of antenatal and delivery care were obtained by women's self-reported experiences, which could have resulted in some recall bias.
- Household annual income and payments for healthcare services were self-reported, therefore, there may have been over- or under-reporting.

## Introduction

Worldwide, nearly 830 women die during pregnancy and childbirth every day, with most of them living in poor households having limited proper maternal health care.<sup>1</sup> Increasing utilization of maternal health services is one of the targets of Sustainable Development Goal 3.<sup>2</sup> Poverty or financial problems are the major barrier to accessibility and utilization of antenatal care (ANC) and delivery by skilled birth attendants (SBAs).<sup>3</sup> Even though the economic indicators of most countries in 2015 are better than in earlier years, there are still some countries which face financial barriers leading to worse health outcomes.<sup>2</sup>

Low socioeconomic level or high health care expenditures can lead to financial burdens, either impoverishment or catastrophic expenditure, which use different analyses and thresholds of burden.<sup>4 5</sup> Financial burdens from utilization of maternal health care have been previously reported in some African and Asian countries such as Ghana, Nepal, Bangladesh, and India.<sup>6-9</sup> In Myanmar, OOP payment for health services was high in public and private health facilities and accounted for more than 80% for total health expenditures of the country in 2012.<sup>10</sup> Only one study of OOP payments for maternal health care in Myanmar with percentage of catastrophic health expenditures in Myanmar was found<sup>11</sup>, therefore, the evidence on impoverishment and catastrophic payments of ANC and delivery care and their determinants was limited.

Different countries have introduced different strategies to reduce financial burdens related to accessing necessary health care during pregnancy, child birth and the postpartum period.<sup>12</sup> Providing free maternal health services has been implemented in some low-income countries, but various studies have found low utilization of these services as well as high maternal mortality and morbidity.<sup>7 13 14</sup> A study in Thailand found improvement of maternal health outcomes five years after the implementation of a universal coverage scheme with health finance reform.<sup>15</sup> Although



1  
2  
3 some countries have begun to offer free health services or health insurance, the achievements in  
4 terms of reducing financial burdens remains limited.<sup>12</sup>  
5  
6

7 Similarly, Myanmar has begun a program providing free essential drugs and health care  
8 for maternal health services in both public facility-based and primary health care settings in  
9 recent years, but OOP payment while accessing these services has been reported.<sup>10 16 17</sup> In  
10 addition, reports on the actual financial burden in terms of impoverishment and catastrophic  
11 expenditure due to OOP payments are limited.<sup>11</sup> Understanding the determinants of financial  
12 burden in utilizing maternal health services is useful to identify the nature of the OOP payment  
13 situation and whether any determinants are modifiable or require policy improvement.<sup>14 18 19</sup> This  
14 study aimed to assess the levels of impoverishment and catastrophic expenditure due to OOP  
15 payments for ANC and delivery care in Yangon Region, Myanmar and explore the determinants  
16 of impoverishment and catastrophic expenditure.  
17  
18  
19  
20  
21  
22  
23  
24  
25  
26  
27  
28  
29

## 30 **Methods**

### 31 ***Study design, participants and sampling method***

32  
33 This was a community-based cross-sectional survey conducted in Yangon Region of Myanmar  
34 during October and November 2016. According to the 2014 census report, Yangon region had the  
35 largest population among the regions of Myanmar.<sup>20</sup> The study recruited women of reproductive  
36 age (15-49 years) with a history of birth within the previous 12 months who were residents of the  
37 study area. Those who had mental retardation or serious illness were excluded. The required  
38 sample size for the first objective was calculated using the one-proportion formula based on a rate  
39 of 9% of pregnant women with catastrophic expenditure due to OOP payments in utilization of  
40 delivery care from a previous study.<sup>11 21</sup> With a precision of 4%, type I error of 1%, non-response  
41 rate of 10% and design effect of 2, at least 750 women were required.  
42  
43  
44  
45  
46  
47  
48  
49  
50  
51  
52  
53  
54  
55  
56  
57  
58  
59  
60

1  
2  
3 Three-stage cluster sampling was used to select eligible persons. For stage one, purposive  
4 selection of two districts among the four districts of Yangon region which covered both urban  
5 and rural populations was done. There were a total of 235 wards and 610 villages in the two  
6 districts. “Wards” and “villages” refer to urban and rural populations, respectively.<sup>22</sup> For stage  
7 two, 16 wards and 16 villages were randomly selected from all of the wards and villages.  
8  
9 Households were selected regarding the number of households and a ratio of urban to rural  
10 population size in the districts considering the proportional probability sampling (PPS). For stage  
11 three, we randomly selected women who had delivered within the past 12 months in each  
12 household from selected wards and villages. For households with more than one eligible woman,  
13 one woman was selected randomly.  
14

### 25 ***Outcome and independent variables***

26  
27 Main outcome measures were the poverty headcount ratio, normalized poverty gap and  
28 catastrophic expenditure incidence due to OOP payments in the utilization of ANC and delivery  
29 care. OOP payments included the expenses on all related healthcare services received during  
30 ANC and delivery care, namely hospital costs/investigation fees, drugs, consultation fees,  
31 food/living/transportation payments and other costs. The OOP payments were calculated for  
32 ANC and delivery care and then summed as total OOP payments for care. OOP payments for  
33 ANC were counted as the sum of all ANC visits. Impoverishment was defined as a situation  
34 where a household fell below the international poverty line (1.9 US dollars in PPP) after paying  
35 for maternal health care services.<sup>23 24</sup> Catastrophic expenditure was defined as OOP payment for  
36 maternal health care services exceeding a threshold of 10% of a household’s annual income.<sup>25</sup>  
37  
38  
39  
40  
41  
42  
43  
44  
45  
46  
47  
48  
49  
50

51 Independent variables included background characteristics of the women and their  
52 husbands and household information, accessibility of health services, characteristics of ANC and  
53 delivery care and details of services provided. Household annual income was classified into  $\leq$   
54  
55  
56  
57  
58  
59  
60

1  
2  
3 1275 US dollars (USD) or >1275 USD according to GDP per capita of Myanmar from the data of  
4  
5 World Bank 2016. The household annual income was recorded in Myanmar kyats and converted  
6  
7 to USD using the exchange rate of 1 USD equal to 1362.63 kyats. The information pertaining to  
8  
9 accessibility to health services included availability of a health center, distance as measured in  
10  
11 walking minutes (number of walking minutes from the woman's house to a formal health center)  
12  
13 and types of transportation (women who used any transport to visit a health center).  
14  
15 Characteristics of ANC and delivery care included complications during pregnancy and child  
16  
17 birth and number of ANC visits. Details of services provided included health personnel, place of  
18  
19 care, affordability, and OOP payments.  
20  
21  
22

### 23 ***Data collection***

24  
25 Before the data collection began, 12 research assistants were trained in a two-day training  
26  
27 workshop on how to conduct the interviews and check the information for completeness of data.  
28  
29 The list of women was obtained from the township health departments and local authorities. The  
30  
31 eligible women were visited at their home by the research team at the woman's convenience.  
32  
33 After the study was explained and a consent form signed, the women were interviewed by the  
34  
35 principal investigator and researchers using a pre-tested structured questionnaire in a private area.  
36  
37 Each completed interview was checked promptly and daily for any errors and edited if required.  
38  
39  
40  
41

### 42 ***Statistical analysis***

43  
44 After data collection was complete, EpiData 3.1 was used to record the data in a double entry  
45  
46 system and validated it, and R version 3.4.2 was used for data analysis.<sup>26 27</sup>  
47  
48

49 We considered the maternal health care services from ANC to delivery care and the pre-  
50  
51 payment period was counted at one point before utilizing the ANC, thus the pre-payment  
52  
53 headcount ratio and normalized poverty gap for ANC and delivery care was the same. Pre-  
54  
55 payment and post-payment headcount ratio was measured by the proportion of households having  
56  
57  
58  
59

1  
2  
3 household annual income below the poverty line before and after the women using the ANC and  
4 delivery care, respectively. The average of the relative income shortfall of the poor from the  
5 poverty line was calculated to represent a normalized poverty gap. A Pen's parade graph between  
6 household income as a multiple of the poverty line (y axis) with cumulative proportion of the  
7 population ranked by household income (x axis) was plotted to show the number of non-poor  
8 households which became poor after OOP for pregnancy expenses as indicated by the vertical  
9 lines below the poverty line. Catastrophic expenditure was measured by the incidence and  
10 intensity. Incidence was calculated by the proportion of households who face catastrophic  
11 expenditure due to OOP payments for ANC or delivery care. Intensity was calculated by the  
12 proportion of OOP payments for ANC and delivery care exceeding the 10% threshold of  
13 household's annual income.<sup>25 28</sup>

14  
15 All independent variables collected were used to test for the determinants of the  
16 incidences of impoverishment and catastrophic expenditure. A multiple logistic regression model  
17 with sampling weights was applied to adjust for the cluster sampling design. For analyzing the  
18 weighted samples, the first-stage weight was calculated by the total number of wards and villages  
19 divided by the selected number of wards and villages by each district and the second-stage weight  
20 was calculated by the total number of women divided by the selected number of women in each  
21 ward and village by each district. The final stage weight was calculated by multiplying the first  
22 stage and second stage weights.<sup>29</sup> The adjusted Odd Ratios (OR) and 95% confidence intervals  
23 were presented in the final models with the significance value less than 0.05.

### 24 ***Patient and Public Involvement***

25 Women and household members or the public were not involved in the development of the  
26 research questions, design of the study or recruitment. The results are not directly disseminated to  
27 study participants.

1  
2  
3  
4  
5  
6  
7  
8  
9  
10  
11  
12  
13  
14  
15  
16  
17  
18  
19  
20  
21  
22  
23  
24  
25  
26  
27  
28  
29  
30  
31  
32  
33  
34  
35  
36  
37  
38  
39  
40  
41  
42  
43  
44  
45  
46  
47  
48  
49  
50  
51  
52  
53  
54  
55  
56  
57  
58  
59  
60

For peer review only

## Results

A total of 759 women were included in this study. More than two-thirds of the women lived in an urban area. Half of the women were aged 24- 35 years and 71% were housewives. More than two-thirds of their husbands had above primary school level education and 60% of them worked as daily wage-earners. Most of the households had less than five household members and 89% of them had an annual household income above 1275 USD, and 60.3% of the households had debt. More than 80% of the women said that a health center was available for them to get ANC services within 30 minutes walking distance. Only 21.2% of the women had less than four ANC visits and 15% and 23% of them faced complications during pregnancy and child birth, respectively (Table 1).

Table 2 shows the details of the services used and payments of the women for ANC and delivery care. More than half (56.4%) met community health personnel for ANC followed by specialists (22.5%) and doctors/nurses (21.1%). Similar numbers had delivery by community health personnel (35.4%) or doctors/nurses (35.2%), with the rest by specialists (29.4%). Most of the women used public facilities for ANC (78%) and delivery care (65%). Almost all of the women said that they could afford the cost of each ANC visit and half could afford the cost of delivery care. OOP payments were made by 75% of the women for ANC and by 99.6% for delivery care. Hospital costs/investigation fees were highest for ANC and delivery care. Cost per each ANC visit was lower, but the total cost for all ANC visits was higher, than the total cost of delivery care.

Table 3 shows impoverishment due to OOP payments for ANC and delivery care. The poverty headcount ratio at pre-payment was 2.4%. The change of poverty headcount ratio comparing post-payment with pre-payment for women using both ANC and delivery care was shown by 6.1% of which 4.3% was for ANC and 1.3% for delivery care. The change of the

1  
2  
3 normalized poverty gap was quite similar to the poverty headcount ratio that it was 1.25% for  
4  
5 ANC and 0.49% for delivery care. Individual pre-payment and post-payment income for OOP of  
6  
7 overall ANC and delivery care is shown in a Pen's parade graph (Fig 1). Overall OOP payments  
8  
9 for ANC and delivery care lead to some extent of poverty regardless of household income level.  
10  
11 Table 4 presents the data on catastrophic expenditure due to OOP payments for ANC and  
12  
13 delivery care. The incidence of households facing catastrophic expenditure due to OOP payments  
14  
15 for ANC, delivery care and overall ANC and delivery care were 12%, 9.1% and 20.9%,  
16  
17 respectively. Intensities of catastrophic expenditures was found in the utilizing ANC more than  
18  
19 delivery care.  
20  
21  
22  
23

24 The determinants of impoverishment and catastrophic expenditure due to OOP payment  
25  
26 for ANC and delivery care are shown in Table 5. Women who were housewives, had lower  
27  
28 number of household members, used more ANC visits and had delivery care by specialists or had  
29  
30 ANC at private health facilities were more likely to face the impoverishment and catastrophic  
31  
32 expenditure due to OOP payments for ANC and delivery care. Women who used delivery care at  
33  
34 private facilities comparing to public facilities increased the odds of impoverishment, but not  
35  
36 with catastrophic expenditure.  
37  
38  
39  
40  
41  
42  
43  
44  
45  
46  
47  
48  
49  
50  
51  
52  
53  
54  
55  
56  
57  
58  
59  
60

## Discussion

Approximately one in ten women accessing ANC and one-fourth of women delivering a baby in the study area faced impoverishment or catastrophic expenditure due to OOP payments. Women with a higher number of household members or increased use of ANC visits or who accessed specialists or private services were more likely to face impoverishment or catastrophic expenditure.

Even though free maternal healthcare services are nationally available, at least three-fourths of the women incurred OOP payments, which was the same as a previous study in Myanmar conducted in 2015.<sup>11</sup> This finding was also similar to previous studies from India in 2004<sup>18</sup> and Nigeria in 2010<sup>13</sup>, although the maternal health services considered and the methods of OOP measurement were different. Similarly, a study of three African countries where free delivery care was available found that 90% of the women still paid some amount of OOP for their direct medical expenses.<sup>30</sup> A possible explanation might be due to the existence of high informal payments or some expenses not being covered by health insurance.<sup>10 11 13 18 30</sup> The need to turn to OOP payments has been shown to influence the utilization of maternal health services and maternal mortality.<sup>31</sup> Importantly, another study reported that high OOP payments for maternal healthcare also lead households to impoverishment and catastrophic expenditure.<sup>4</sup>

The impoverishment rates in published studies vary depending on the methods used to measure health care expenditures and the poverty line thresholds used for calculating impoverishment. Our study used the international poverty line in 2011 of 1.9 USD per day, but a study from Nepal used the international poverty line in 2005 of 1 USD per day and reported the poverty headcount ratio due to the use of institutional delivery reported for 17%<sup>8</sup> which was higher than that of our study. In contrast, a study in India used the local poverty line and found higher impoverishment due to maternal health care expenditure than the findings of our study.<sup>32</sup>



1  
2  
3 Although Yangon region is the most developed region in Myanmar, a lot of non-poor households  
4 face impoverishment and deep poverty which could be explained by high maternal healthcare  
5 payments without a compensation scheme.<sup>10 20</sup> Two studies from India using data from 2004 and  
6  
7  
8 2015 found that the change of the poverty headcount ratio for maternal healthcare expenditures  
9  
10  
11 was lower after introducing free services for delivery care in 2015.<sup>32 33</sup>  
12  
13

14  
15 Likewise, variations in the incidence of catastrophic expenditure due to maternal health  
16 care expenditures depend on the different maternal services measured, whether household income  
17 or capacity to pay is considered, and the catastrophic expenditure threshold used. One fourth of  
18 women faced catastrophic expenditure due to OOP payment for ANC and delivery care in our  
19 study, which was higher than an earlier study from Myanmar in 2015. This may be because the  
20 previous study measured catastrophic expenditure based only on OOP payments for delivery  
21 care, not ANC, and also only direct and indirect medical costs, not other costs or productivity  
22 loss.<sup>11</sup> Higher incidences of catastrophic expenditure due to OOP were reported in India and  
23 Ethiopia because poorer women were included and all ANC, delivery and postnatal care services  
24 were measured.<sup>32 34</sup> Prior studies from Africa and Bangladesh concluded that more than one third  
25 of women faced catastrophic expenditure due to OOP payments for emergency obstetric care  
26 because they were poor and were required to pay for drugs.<sup>35-37</sup>  
27  
28  
29  
30  
31  
32  
33  
34  
35  
36  
37  
38  
39  
40  
41

42 Woman's occupation, with lower number of household members, utilization of health  
43 personnel, increased number of ANC visits and place of care were associated with  
44 impoverishment and catastrophic expenditure due to OOP payments. A previous study could not  
45 identify a direct association between occupation and impoverishment and catastrophic  
46 expenditure. The significant association between woman's occupation and impoverishment and  
47 catastrophic expenditure found in our study could be explained by woman reduced working  
48 because of their pregnancy leading to lower household income. The number of household  
49  
50  
51  
52  
53  
54  
55  
56  
57  
58  
59  
60

1  
2  
3 members increased the impoverishment and catastrophic expenditure in our study which was  
4  
5 different from a previous study from India<sup>19</sup> which could be explained by lower sharing financial  
6  
7 resources among household members of the study participants. The finding of higher rates of  
8  
9 catastrophic expenditure in women with a higher number of ANC visits was also similar to a  
10  
11 study in India which included women with low economic status.<sup>38</sup> Other previous studies have  
12  
13 found that women who used a nearby health center or facilities having specialists and private  
14  
15 facilities for ANC and delivery care where health insurance was not available were more likely to  
16  
17 have impoverishment and catastrophic expenditure.<sup>14 18 19 31 38 39</sup>  
18  
19  
20

21  
22 Only one previous study from Myanmar in rural areas of a township in Ayeyarwaddy  
23  
24 region measured catastrophic health expenditure resulting from maternal health care.<sup>11</sup> Our study  
25  
26 included both rural and urban areas of Yangon region, and provides important information on  
27  
28 these factors for policy makers to help them consider financial burdens leading to  
29  
30 impoverishment or catastrophic expenditure.  
31  
32

33  
34 The study had some limitations. First, this was a cross sectional study, thus the causal  
35  
36 relationship between the determinants and level of impoverishment and catastrophic expenditure  
37  
38 due to OOP payments for ANC and delivery care could not be firmly identified. Second,  
39  
40 household annual income and payments for healthcare services were self-reported, therefore,  
41  
42 there may have been over- or under-reporting. Third, the payment of total ANC used the payment  
43  
44 of last ANC visit and then multiplied by the total number of all visits. Fourth, recall bias might  
45  
46 have occurred due to the data gathering through retrospective interviews. However, we included  
47  
48 only women within 12 months of delivery to minimize the recall bias. Finally, the socioeconomic  
49  
50 status of the people in the Yangon region is better than in other regions; therefore, the findings of  
51  
52 this study are not likely representative of the entire country.  
53  
54  
55  
56  
57  
58  
59  
60

## Conclusions

High OOP payments for utilization of ANC and delivery care in the Yangon region of Myanmar resulted in one-tenth of the women becoming impoverished and one-fourth suffering a catastrophic expenditure. Women with lower number of household members or increased use of ANC visits or who accessed specialists or private services were more likely to face impoverishment or catastrophic expenditure.

## Acknowledgements

This study was a part of the thesis of the first author to fulfill the requirements of a doctoral degree in Epidemiology at Prince of Songkla University. We would like to thank the Ministry of Health and Sports and Regional Department of Yangon for their permission and support in data collection.

## Contributors

All authors contributed to the concept and design of the study. ANMM and TL participated in data collection, data analysis, interpretation of the data, and preparation of the draft manuscript. TTH, MMW, JS and EB also assisted with interpretation of the data and commented on the draft MS. All authors read and approved the final manuscript.

## Competing interests

The authors declare no competing interests.

## Funding

Thanks to Norwegian Agency for Development Cooperation (Norad) for funding the project 'Health and Sustainable Development in Myanmar – Competence building in public health and medical research and education, MY-NORTH', through the NORHED-programme: Norad: 1300650, MMR-13/0049 NORHED, UiO: 211782.

### **Ethical approval**

Ethical clearances for the study were obtained from the Ethical Review Committee of Prince of Songkla University, Thailand, the Department of Medical Research, Myanmar and the Norwegian National Research Ethics Committee (NSD), Norway.

### **Data sharing statement**

No additional data available. Original data without identity can be provided on request after the Ethical Review Committee of Prince of Songkla University are informed and approved.

## References

1. WHO. *WHO fact sheet on maternal mortality*. Geneva: World Health Organization, 2016.
2. WHO. *Health in 2015: from MDGs, millennium development goals to SDGs, sustainable development goals*. Geneva: World Health Organization, 2015.
3. UNICEF. *Monitoring and situation of child and women*. New York: United Nations International Children's Emergency Fund, 2015.
4. Saksena P, Hsu J, Evans DB. Financial risk protection and universal health coverage: evidence and measurement challenges. *PLoS Med* 2014;11(9):e1001701.
5. WHO, World Bank. *Tracking universal health coverage*. Geneva: World Health Organization, 2015.
6. Skordis-Worrall J, Pace N, Bapat U, et al. Maternal and neonatal health expenditure in mumbai slums (India): a cross sectional study. *BMC Public Health* 2011;11:150.
7. Dalaba MA, Akweongo P, Aborigo RA, et al. Cost to households in treating maternal complications in northern Ghana: a cross sectional study. *BMC Health Servs Res* 2015;15:34.
8. Gartoulla P, Liabsuetrakul T, Chongsuvivatwong V, et al. Ability to pay and impoverishment among women who give birth at a university hospital in kathmandu, Nepal. *Glob Public Health* 2012;7(10):1145-56.
9. Rahman M, Rob U, Noor FR, et al. Out-of-pocket expenses for maternity care in rural Bangladesh: a public-private comparison. *Int Q Community Health Educ* 2012;33(2):143-57.
10. World Bank. *Myanmar: public expenditure review 2015*. Washington D.C: World Bank, 2015.

- 1  
2  
3 11. Han WW, Saw S, Einda HMT, et al. Out of pocket expenditure on maternal and child health  
4  
5 care services among rural households in dedaye township, Myanmar. *Myanmar Med J*  
6  
7 2017;59(2):37-49.  
8  
9
- 10 12. Borghi J, Ensor T, Somanathan A, et al. Mobilising financial resources for maternal health.  
11  
12 *Lancet* 2006;368:1457-65.  
13
- 14 13. Kalu-Umeh NN, Sambo MN, Idris SH, et al. Costs and patterns of financing maternal health  
15  
16 care services in rural communities in northern Nigeria: evidence for designing national  
17  
18 fee exemption policy. *Int J MCH AIDS* 2013;2(1):163-72.  
19  
20
- 21 14. Goli S, Moradkhaj, Rammohan A, et al. High spending on maternity care in India: what are  
22  
23 the factors explaining it? *PloS One* 2016;11(6): e0156437.  
24  
25
- 26 15. Limwattananon S, Tangcharoensathien V, Prakongsai P. Equity in maternal and child health  
27  
28 in Thailand. *Bull World Health Organ* 2010;88(6):420-7.  
29  
30
- 31 16. Latt NN, Cho SM, Htun NMM, et al. Healthcare in Myanmar. *Nagoya J Med Sci* 2016;78(2):  
32  
33 123-34.  
34
- 35 17. Myanmar Ministry of Health and Sports. *Myanmar national health plan 2017 - 2021*. Nay Pyi  
36  
37 Taw: Ministry of Health and Sports, 2016.  
38  
39
- 40 18. Kerketta S. Out of pocket expenditure on utilization of ante-natal and delivery care services in  
41  
42 India: analysis based on NSSO 60th round. *Int J Reprod Contracept Obstet Gynecol*  
43  
44 2015;4(6):1704-09.  
45  
46
- 47 19. Leone T, James KS, Padmadas SS. The burden of maternal health care expenditure in India:  
48  
49 multilevel analysis of national data. *Matern Child Health J* 2013;17(9):1622-30.  
50  
51
- 52 20. Myanmar Ministry of Immigration and Population. *Yangon region census report*. Nay Pyi  
53  
54 Taw: Ministry of Immigration and Population, 2014.  
55  
56  
57  
58  
59  
60

- 1  
2  
3 21. WHO. *Sample size determination in health studies \_practical manual*. Geneva: World Health  
4  
5 Organization,1991.  
6
- 7 22. Myanmar Ministry of Home Affairs. *Myanmar administrative structure*. Nay Pyi Taw:  
8  
9 Ministry of Home Affairs, 2012.  
10
- 11 23. WHO. *Distribution of health payments and catastrophic expenditures methodology*. Geneva:  
12  
13 World Health Organization, 2005.  
14
- 15 24. World Bank. *Country poverty brief, Myanmar*. Washington D.C: World Bank, 2017.  
16
- 17 25. O'Donnell O, Doorslaer Ev, Wagstaff A, et al. *Analyzing health equity using household*  
18  
19 *survey data: a guide to techniques and their implementation*. Washington, D.C: World  
20  
21 Bank, 2008.  
22  
23
- 24 26. R: a language and environment for statistical computing. R foundation for statistical  
25  
26 computing. 1.0.153 version. Vienna, Austria, 2015.  
27  
28
- 29 27. EpiData entry. 3.1 version. Odense, Denmark, 2005.  
30
- 31 28. Wagstaff A, Doorslaer Ev. Catastrophe and impoverishment in paying for health care: with  
32  
33 applications to Vietnam 1993-1998. *Health Econ* 2003;12(11):921–34.  
34  
35
- 36 29. Lumley T. *Complex sampling and R*. A John Wiley & Sons, Inc., Washington D.C, 2009.  
37
- 38 30. Perkins M, Brazier E, Themmen E, et al. Out-of-pocket costs for facility-based maternity care  
39  
40 in three African countries. *Health Policy Plan* 2009;24(4):289-300.  
41  
42
- 43 31. Mohanty SK, Kastor A. Out-of-pocket expenditure and catastrophic health spending on  
44  
45 maternal care in public and private health centres in India: a comparative study of pre and  
46  
47 post national health mission period. *Health Econ Rev* 2017;7(1):31.  
48  
49
- 50 32. Mukherjee S, Singh A, Chandra R. Maternity or catastrophe: a study of household  
51  
52 expenditure on maternal health care in India. *Health* 2013;5(1):109-18.  
53  
54  
55  
56  
57  
58  
59  
60

- 1  
2  
3 33. Prinja S, Bahuguna P, Gupta R, et al. Coverage and financial risk protection for institutional  
4  
5 delivery: how universal is provision of maternal health care in India? *PloS One*  
6  
7 2015;10(9):e0137315.  
8  
9  
10 34. Akalu T, Guda A, Tamiru M, et al. Examining out of pocket payments for maternal health in  
11  
12 rural Ethiopia: paradox of free health care un-affordability. *Ethiop J Health Dev*  
13  
14 2012;26(1):251-57.  
15  
16  
17 35. Shukla M, Kumar A, Agarwal M, et al. Out-of-pocket expenditure on institutional delivery in  
18  
19 rural Lucknow. *Indian J Comm Health* 2015;27(2):241-246.  
20  
21  
22 36. Honda A, Randaoharison PG, Matsui M. Affordability of emergency obstetric and neonatal  
23  
24 care at public hospitals in Madagascar. *Reprod Health Matters* 2017;19(37):10-20.  
25  
26  
27 37. Hoque ME, Dasgupta SK, Naznin E, et al. Household coping strategies for delivery and  
28  
29 related healthcare cost: findings from rural Bangladesh. *Trop Med Int Health*  
30  
31 2015;20(10):1368-75.  
32  
33 38. Goli S, Rammohan A, Moradhvaj. Out-of-pocket expenditure on maternity care for hospital  
34  
35 births in uttar pradesh, India. *Health Econ Rev* 2018;8(1):5.  
36  
37  
38 39. Bonu S, Bhushan I, Rani M, et al. Incidence and correlates of 'catastrophic' maternal health  
39  
40 care expenditure in India. *Health Policy Plan* 2009;24(6):445-56.  
41  
42  
43  
44  
45  
46  
47  
48  
49  
50  
51  
52  
53  
54  
55  
56  
57  
58  
59  
60



## List of Tables and Figure

Table 1. Background characteristics of women and their husbands, household information, accessibility of health services and characteristics of ANC and delivery care (n=759)

Table 2. Details of services used and payments of the women for ANC and delivery care (n=759)

Table 3. Impoverishment due to OOP payments for ANC and delivery care (n=757)

Figure 1. Pen's parade of pre- and post-payment income of overall antenatal and delivery care

Legend

— Pre-payment income      — Post-payment income  
- - - - - Income based poverty line

Table 4. Catastrophic expenditure due to OOP payments for ANC and delivery care (n=757)

Table 5. Determinants of impoverishment and catastrophic expenditure due to OOP payments (n=757)

Table 1. Background characteristics of women and their husbands, household information, accessibility of health services and characteristics of ANC and delivery care (n=759)

| Characteristic                          | n (%)      |
|-----------------------------------------|------------|
| <b>Women's characteristics</b>          |            |
| Place of residence                      |            |
| Urban                                   | 542 (72.4) |
| Rural                                   | 217 (28.6) |
| Age                                     |            |
| 15-24 years                             | 215 (28.3) |
| 25-34 years                             | 376 (49.5) |
| 35-49 years                             | 168 (22.1) |
| Occupation                              |            |
| Housework                               | 539 (71)   |
| Any job                                 | 220 (29)   |
| <b>Husbands' characteristics</b>        |            |
| Education                               |            |
| Primary school and lower                | 242 (31.9) |
| More than primary school                | 517 (68.1) |
| Occupation                              |            |
| Daily wage earner                       | 455 (59.9) |
| Other                                   | 304 (40.1) |
| <b>Household characteristics</b>        |            |
| Number of household members             |            |
| > 5 members                             | 276 (38.4) |
| 3-5 members                             | 483 (63.6) |
| Household annual income                 |            |
| ≤ 1275 USD                              | 83 (10.9)  |
| > 1275 USD                              | 676 (89.1) |
| Household debt                          |            |
| No                                      | 301 (39.7) |
| Yes                                     | 458 (60.3) |
| <b>Accessibility of health services</b> |            |
| Availability of health center           |            |
| No                                      | 123 (16.2) |
| Yes                                     | 636 (83.8) |
| Walking distance in minutes             |            |
| > 30 minutes                            | 76 (10)    |
| ≤ 30 minutes                            | 683 (90)   |
| Type of transportation                  |            |
| Car                                     | 79 (10.4)  |
| Motorcycle                              | 172 (22.7) |

|                                                 |            |
|-------------------------------------------------|------------|
| Walking                                         | 406 (53.3) |
| Other                                           | 102 (13.4) |
| <hr/>                                           |            |
| <b>Characteristics of ANC and delivery care</b> |            |
| Number of ANC visits                            |            |
| 1-3                                             | 161 (21.2) |
| 4-6                                             | 262 (34.5) |
| > 6                                             | 336 (44.3) |
| Complication during pregnancy                   |            |
| No                                              | 645 (85.0) |
| Yes                                             | 114 (15.0) |
| Complication during birth                       |            |
| No                                              | 584 (76.9) |
| Yes                                             | 175 (23.1) |
| <hr/>                                           |            |

Table 2. Details of services used and payments of the women for ANC and delivery care (n=759)

|                                                                  | <b>Antenatal care</b> | <b>Delivery care</b> |
|------------------------------------------------------------------|-----------------------|----------------------|
|                                                                  | <b>n (%)</b>          | <b>n (%)</b>         |
| <b>Health personnel</b>                                          |                       |                      |
| Community health personnel                                       | 428 (56.4)            | 269 (35.4)           |
| Specialists                                                      | 171 (22.5)            | 223 (29.4)           |
| Doctors/Nurses                                                   | 160 (21.1)            | 267 (35.2)           |
| <b>Place of care</b>                                             |                       |                      |
| Public facilities                                                | 592 (78)              | 493 (65)             |
| Private facilities                                               | 167 (22)              | 266 (35)             |
| <b>Affordability (per visit/delivery)</b>                        |                       |                      |
| No                                                               | 26 (3.4)              | 338 (44.5)           |
| Yes                                                              | 733 (96.6)            | 421 (55.5)           |
| <b>Out-of-pocket payments</b>                                    |                       |                      |
| No                                                               | 186 (24.5)            | 3 (0.4)              |
| Yes                                                              | 573 (75.5)            | 756 (99.6)           |
|                                                                  | <b>(n=573)</b>        | <b>(n=756)</b>       |
| <b>Total costs of care</b>                                       | 31.7 (0-12072.2)      | 84.4 (0-2305.1)      |
| <b>Total out-of-pocket payments of care</b>                      | 31.7 (0-10633.8)      | 73.4 (0-1541.1)      |
| <b>Categories of out-of-pocket payments (per visit/delivery)</b> |                       |                      |
| Hospital cost/Investigation fees                                 | 0.73 (0-80.8)         | 7.34 (0-1247.6)      |
| Drugs                                                            | 0 (0-40.4)            | 0 (0-587.1)          |
| Consultation fees                                                | 0 (0-23.9)            | 0 (0-440.3)          |
| Food/Travel/Living cost                                          | 0.57 (0-73.4)         | 2.94 (0-1027.4)      |
| Other expenses                                                   | 0 (0-29.4)            | 0 (0-220.2)          |
| Sum of costs                                                     | 4.8 (0-759.6)         | 73.4 (0-1541.1)      |

Table 3. Impoverishment due to OOP payments for ANC and delivery care (n=757)

|                               | Impoverishment due to OOP payments (%) |                  |        |                  |        |                                        |        |
|-------------------------------|----------------------------------------|------------------|--------|------------------|--------|----------------------------------------|--------|
|                               | Before utilizing                       |                  |        |                  |        |                                        |        |
|                               | ANC or<br>delivery care                | Antenatal care   |        | Delivery care    |        | Overall antenatal<br>and delivery care |        |
|                               | Pre-payment                            | Post-<br>payment | Change | Post-<br>payment | Change | Post-<br>payment                       | Change |
| Poverty<br>headcount<br>ratio | 2.4                                    | 6.7              | 4.3    | 3.7              | 1.3    | 8.5                                    | 6.1    |
| Normalized<br>poverty gap     | 0.01                                   | 1.26             | 1.25   | 0.50             | 0.49   | 1.40                                   | 1.39   |

Table 4. Catastrophic expenditure due to OOP payments for ANC and delivery care (n=757)

| <b>Catastrophic expenditure<br/>due to OOP payments</b> | <b>Antenatal care</b> | <b>Delivery care</b> | <b>Overall antenatal and<br/>delivery care</b> |
|---------------------------------------------------------|-----------------------|----------------------|------------------------------------------------|
| Incidence (%)                                           | 12.0                  | 9.1                  | 20.9                                           |
| Intensity (%)                                           | 6.1                   | 1.7                  | 9.2                                            |

For peer review only

Table 5. Determinants of impoverishment and catastrophic expenditure due to OOP payments for overall ANC and delivery care (n=757)

| Characteristic                            | Impoverishment<br>Adjusted OR (95% CI) | Catastrophic expenditure<br>Adjusted OR (95% CI) |
|-------------------------------------------|----------------------------------------|--------------------------------------------------|
| <b>Woman's occupation</b>                 |                                        |                                                  |
| Other (ref.)                              | 1                                      | 1                                                |
| Housewife                                 | 4.81 (1.91-12.12)***                   | 2.18 (1.16-4.10)*                                |
| <b>Number of household members</b>        |                                        |                                                  |
| > 5 (ref.)                                | 1                                      | 1                                                |
| 3-5                                       | 7.13 (2.77-18.33)***                   | 7.82 (4.41-13.89)***                             |
| <b>Number of ANC visits</b>               |                                        |                                                  |
| 1-3 (ref.)                                | 1                                      | 1                                                |
| 4-6                                       | 1.26 (0.35-4.52)                       | 2.06 (0.99-4.31)                                 |
| > 6                                       | 5.73 (1.90-17.26)**                    | 5.63(2.96-10.70)***                              |
| <b>Health personnel for delivery care</b> |                                        |                                                  |
| Community health personnel (ref.)         | 1                                      | 1                                                |
| Specialists                               | 2.97 (1.14-7.76)*                      | 4.83 (2.24-10.44)***                             |
| Doctors/Nurses                            | 2.22 (0.78-6.33)                       | 3.45 (1.64-7.27)**                               |
| <b>Place of antenatal care</b>            |                                        |                                                  |
| Public facilities (ref.)                  | 1                                      | 1                                                |
| Private facilities                        | 2.46 (1.14-5.32)*                      | 2.42 (1.40-4.17)**                               |
| <b>Place of delivery care</b>             |                                        |                                                  |
| Public facilities (ref.)                  | 1                                      |                                                  |
| Private facilities                        | 3.29 (1.41-7.70)**                     |                                                  |

p < 0.05 \*, p < 0.01 \*\*, p < 0.001 \*\*\*, OR: Odds Ratio, CI: Confidence Interval

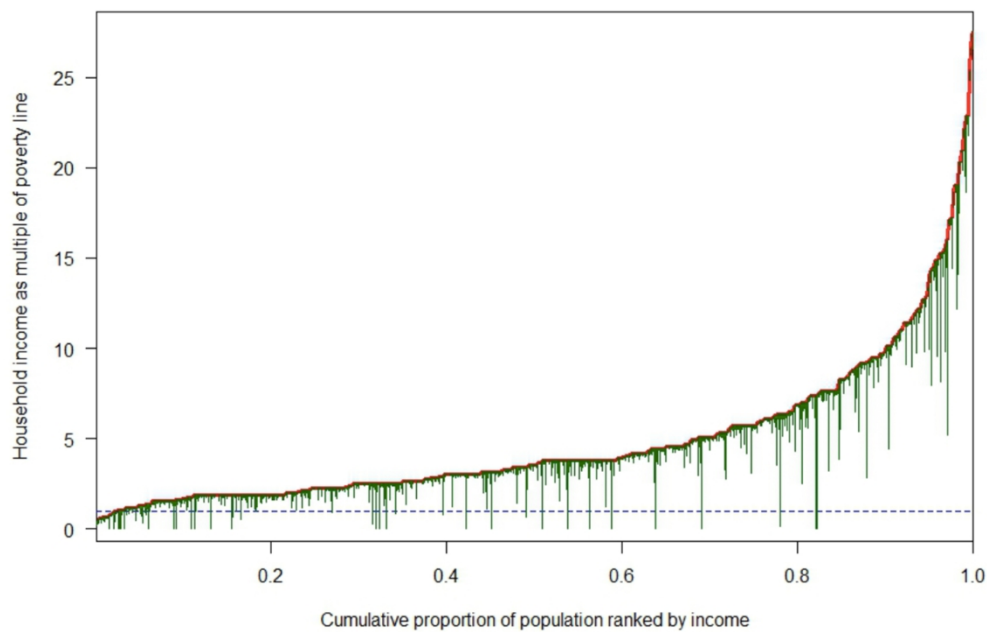

Figure 1

83x53mm (600 x 600 DPI)



**STROBE 2007 (v4) Statement—Checklist of items that should be included in reports of *cross-sectional studies***

| Section/Topic                | Item # | Recommendation                                                                                                                                                                       | Reported on page # |
|------------------------------|--------|--------------------------------------------------------------------------------------------------------------------------------------------------------------------------------------|--------------------|
| <b>Title and abstract</b>    | 1      | (a) Indicate the study's design with a commonly used term in the title or the abstract                                                                                               | 1-2                |
|                              |        | (b) Provide in the abstract an informative and balanced summary of what was done and what was found                                                                                  | 2                  |
| <b>Introduction</b>          |        |                                                                                                                                                                                      |                    |
| Background/rationale         | 2      | Explain the scientific background and rationale for the investigation being reported                                                                                                 | 4-5                |
| Objectives                   | 3      | State specific objectives, including any prespecified hypotheses                                                                                                                     | 5                  |
| <b>Methods</b>               |        |                                                                                                                                                                                      |                    |
| Study design                 | 4      | Present key elements of study design early in the paper                                                                                                                              | 5                  |
| Setting                      | 5      | Describe the setting, locations, and relevant dates, including periods of recruitment, exposure, follow-up, and data collection                                                      | 5-8                |
| Participants                 | 6      | (a) Give the eligibility criteria, and the sources and methods of selection of participants                                                                                          | 5                  |
| Variables                    | 7      | Clearly define all outcomes, exposures, predictors, potential confounders, and effect modifiers. Give diagnostic criteria, if applicable                                             | 6-7                |
| Data sources/<br>measurement | 8*     | For each variable of interest, give sources of data and details of methods of assessment (measurement). Describe comparability of assessment methods if there is more than one group | 6-8                |
| Bias                         | 9      | Describe any efforts to address potential sources of bias                                                                                                                            | 6-7                |
| Study size                   | 10     | Explain how the study size was arrived at                                                                                                                                            | 5-6                |
| Quantitative variables       | 11     | Explain how quantitative variables were handled in the analyses. If applicable, describe which groupings were chosen and why                                                         | 7-8                |
| Statistical methods          | 12     | (a) Describe all statistical methods, including those used to control for confounding                                                                                                | 7-8                |
|                              |        | (b) Describe any methods used to examine subgroups and interactions                                                                                                                  | N/A                |
|                              |        | (c) Explain how missing data were addressed                                                                                                                                          | N/A                |
|                              |        | (d) If applicable, describe analytical methods taking account of sampling strategy                                                                                                   | 8                  |
|                              |        | (e) Describe any sensitivity analyses                                                                                                                                                | N/A                |
| <b>Results</b>               |        |                                                                                                                                                                                      |                    |

|                          |     |                                                                                                                                                                                                              |       |
|--------------------------|-----|--------------------------------------------------------------------------------------------------------------------------------------------------------------------------------------------------------------|-------|
| Participants             | 13* | (a) Report numbers of individuals at each stage of study—eg numbers potentially eligible, examined for eligibility, confirmed eligible, included in the study, completing follow-up, and analysed            | 9     |
|                          |     | (b) Give reasons for non-participation at each stage                                                                                                                                                         | N/A   |
|                          |     | (c) Consider use of a flow diagram                                                                                                                                                                           | N/A   |
| Descriptive data         | 14* | (a) Give characteristics of study participants (eg demographic, clinical, social) and information on exposures and potential confounders                                                                     | 9     |
|                          |     | (b) Indicate number of participants with missing data for each variable of interest                                                                                                                          | N/A   |
| Outcome data             | 15* | Report numbers of outcome events or summary measures                                                                                                                                                         | 9-10  |
| Main results             | 16  | (a) Give unadjusted estimates and, if applicable, confounder-adjusted estimates and their precision (eg, 95% confidence interval). Make clear which confounders were adjusted for and why they were included | 10    |
|                          |     | (b) Report category boundaries when continuous variables were categorized                                                                                                                                    | 9-10  |
|                          |     | (c) If relevant, consider translating estimates of relative risk into absolute risk for a meaningful time period                                                                                             | N/A   |
| Other analyses           | 17  | Report other analyses done—eg analyses of subgroups and interactions, and sensitivity analyses                                                                                                               | N/A   |
| <b>Discussion</b>        |     |                                                                                                                                                                                                              |       |
| Key results              | 18  | Summarise key results with reference to study objectives                                                                                                                                                     | 11    |
| Limitations              | 19  | Discuss limitations of the study, taking into account sources of potential bias or imprecision. Discuss both direction and magnitude of any potential bias                                                   | 13    |
| Interpretation           | 20  | Give a cautious overall interpretation of results considering objectives, limitations, multiplicity of analyses, results from similar studies, and other relevant evidence                                   | 11-13 |
| Generalisability         | 21  | Discuss the generalisability (external validity) of the study results                                                                                                                                        | 13    |
| <b>Other information</b> |     |                                                                                                                                                                                                              |       |
| Funding                  | 22  | Give the source of funding and the role of the funders for the present study and, if applicable, for the original study on which the present article is based                                                | 14    |

\*Give information separately for cases and controls in case-control studies and, if applicable, for exposed and unexposed groups in cohort and cross-sectional studies.

**Note:** An Explanation and Elaboration article discusses each checklist item and gives methodological background and published examples of transparent reporting. The STROBE checklist is best used in conjunction with this article (freely available on the Web sites of PLoS Medicine at <http://www.plosmedicine.org/>, Annals of Internal Medicine at <http://www.annals.org/>, and Epidemiology at <http://www.epidem.com/>). Information on the STROBE Initiative is available at [www.strobe-statement.org](http://www.strobe-statement.org).

# BMJ Open

## Impoverishment and catastrophic expenditures due to out-of-pocket payments for antenatal and delivery care in Yangon region, Myanmar: a cross-sectional study

|                                 |                                                                                                                                                                                                                                                                                                                                                                                                                                                                                                                                                              |
|---------------------------------|--------------------------------------------------------------------------------------------------------------------------------------------------------------------------------------------------------------------------------------------------------------------------------------------------------------------------------------------------------------------------------------------------------------------------------------------------------------------------------------------------------------------------------------------------------------|
| Journal:                        | <i>BMJ Open</i>                                                                                                                                                                                                                                                                                                                                                                                                                                                                                                                                              |
| Manuscript ID                   | bmjopen-2018-022380.R4                                                                                                                                                                                                                                                                                                                                                                                                                                                                                                                                       |
| Article Type:                   | Research                                                                                                                                                                                                                                                                                                                                                                                                                                                                                                                                                     |
| Date Submitted by the Author:   | 31-Oct-2018                                                                                                                                                                                                                                                                                                                                                                                                                                                                                                                                                  |
| Complete List of Authors:       | Myint, Aye Nyein Moe; Ministry of Health and Sports, International Relations Division<br>Liabsuetrakul, Tippawan; Prince of Songkla University, Epidemiology Unit, Faculty of Medicine<br>Htay, Thein Thein; Seisa University, Visiting Professor<br>Wai, Myint Myint; Ministry of Health and Sports, Department of Medical Services (Planning)<br>Sundby, Johanne; University of Oslo, Department of Community and Global Health<br>Bjertness, Espen; University of Oslo, Section for Preventive Medicine and Epidemiology, Institute of Health and Society |
| <b>Primary Subject Heading</b>: | Health policy                                                                                                                                                                                                                                                                                                                                                                                                                                                                                                                                                |
| Secondary Subject Heading:      | Public health, Health economics, Obstetrics and gynaecology                                                                                                                                                                                                                                                                                                                                                                                                                                                                                                  |
| Keywords:                       | Health policy < HEALTH SERVICES ADMINISTRATION & MANAGEMENT, Public health < INFECTIOUS DISEASES, PRIMARY CARE, Health economics < HEALTH SERVICES ADMINISTRATION & MANAGEMENT                                                                                                                                                                                                                                                                                                                                                                               |
|                                 |                                                                                                                                                                                                                                                                                                                                                                                                                                                                                                                                                              |

SCHOLARONE™  
Manuscripts

1  
2  
3 **Impoverishment and catastrophic expenditures due to out-of-pocket payments for**  
4  
5 **antenatal and delivery care in Yangon region, Myanmar: a cross-sectional study**  
6

7 Aye Nyein Moe Myint, M.B., B.S, MPH, MA (Pop & RH)<sup>1</sup>, Tippawan Liabsuetrakul, MD,  
8 PhD<sup>2\*</sup>, Thein Thein Htay, M.B., B.S, M.Med.Sc (PH), MHS (Pop & RH)<sup>3</sup>, Myint Myint Wai,  
9 M.B., B.S, M.Med.Sc (PH)<sup>4</sup>, Johanne Sundby, MD, PhD<sup>5</sup>, Espen Bjertness, PhD<sup>6</sup>  
10  
11  
12  
13

14 <sup>1</sup>International Relations Division, Ministry of Health and Sports, Nay Pyi Taw, Myanmar

15 Email: [anmoemyint@gmail.com](mailto:anmoemyint@gmail.com)

16 <sup>2</sup>Epidemiology Unit, Faculty of Medicine, Prince of Songkla University, Hat Yai, Songkhla,  
17 Thailand  
18

19 <sup>3</sup>Seisa University, Ashigarashimo District, Kanagawa, Japan

20 Email: [htaythein90@gmail.com](mailto:htaythein90@gmail.com)

21 <sup>4</sup>Department of Medical Services (Planning), Ministry of Health and Sports, Nay Pyi Taw,  
22 Myanmar, Email: [m.m.wai@medisin.uio.no](mailto:m.m.wai@medisin.uio.no)  
23

24 <sup>5</sup>Department of Community and Global Health, University of Oslo, Norway

25 Email: [johanne.sundby@medisin.uio.no](mailto:johanne.sundby@medisin.uio.no)

26 <sup>6</sup>Department of Community and Global Health, University of Oslo, Norway

27 Email: [espen.bjertness@medisin.uio.no](mailto:espen.bjertness@medisin.uio.no)  
28  
29  
30  
31

32 \*Correspondence: Tippawan Liabsuetrakul

33 Epidemiology Unit, Faculty of Medicine

34 Prince of Songkla University

35 Hat Yai, Songkhla, 90110, Thailand

36 Tel: +66 74 451165 Fax: +66 74 429754

37 E-mail: [ltippawa@yahoo.com](mailto:ltippawa@yahoo.com)  
38  
39  
40  
41  
42  
43  
44  
45  
46  
47  
48

49 Word count: 3,332 words

50 Number of tables: 5

51 Number of figures: 1  
52  
53  
54  
55  
56  
57  
58  
59  
60

**Abstract (257 words)**

**Objectives:** (i) To assess the levels of impoverishment and catastrophic expenditure due to out-of-pocket (OOP) payments for antenatal care (ANC) and delivery care in Yangon Region, Myanmar; and (ii) to explore the determinants of impoverishment and catastrophic expenditure.

**Design, setting and participants:** A community-based cross-sectional survey among women giving birth within the past 12 months in Yangon, Myanmar was conducted during October–November 2016 using three-stage cluster sampling procedure.

**Outcome measures:** Poverty headcount ratio, normalized poverty gap and catastrophic expenditure incidence due to OOP payments in the utilization of ANC and delivery care as well as the determinants of impoverishment and catastrophic expenditure.

**Results:** Of 759 women, out-of-pocket payments were made by 75% of the women for ANC and 99.6% for delivery care. The poverty headcount ratios after payments increased to 4.3% among women using the ANC services, to 1.3% among those using delivery care and to 6.1% among those using both ANC and delivery care. The incidences of catastrophic expenditure after payments were found to be 12% for ANC, 9.1% for delivery care, and 20.9% for both ANC and delivery care. The determinants of impoverishment and catastrophic expenditure were women's occupation, number of household members, number of ANC visits, and utilization of skilled health personnel and health facilities. The associations of the outcomes with these variables bear both negative and positive signs.

**Conclusions:** Out-of-pocket payments for all ANC and delivery care services are a challenge to women, as one-tenth of them become impoverished and a further one-fourth incur catastrophic expenditures after visiting facilities that offer these services.

**Keywords:** impoverishment, catastrophic expenditure, out-of-pocket payment, antenatal care, delivery care

### Strengths

- This study measured impacts of OOP payments for antenatal and delivery care on levels of impoverishment and catastrophic expenditure in Myanmar, one of the few studies on this issue in a low-income country. Other determinants of impoverishment and catastrophic expenditure were also analyzed using logistic regression and found to be important.
- Multistage sampling design and the use of adjusted standard errors in the analysis minimized the sampling bias and provided reliable and policy relevant estimates.
- The data on social determinants of OOP payments for antenatal and delivery care were also collected and the evidence from their analysis has been incorporated in this study.

### Limitations

- The data on expenditures of antenatal and delivery care are based on women's self-reported experiences during service utilization, and may thus contain some recall bias.
- Household annual incomes as well OOP payments for healthcare services are self-reported and may suffer from over- or under-reporting.

## Introduction

Worldwide, nearly 830 women die during pregnancy and childbirth every day, with most of them living in poor households having limited proper maternal health care.<sup>1</sup> Increasing utilization of maternal health services is one of the targets of Sustainable Development Goal 3.<sup>2</sup> Poverty or financial problems are the major barrier to accessibility and utilization of antenatal care (ANC) and delivery by skilled birth attendants (SBAs).<sup>3</sup> Even though the economic indicators of most countries in 2015 were better than in earlier years, there are still some countries which face financial barriers leading to worse health outcomes.<sup>2</sup>

Low socioeconomic level or high health care expenditures can lead to financial burdens, either impoverishment or catastrophic expenditure, which use different analyses and thresholds of burden.<sup>4 5</sup> Financial burdens from utilization of maternal health care have been previously reported in some African and Asian countries such as Ghana, Nepal, Bangladesh, and India.<sup>6-9</sup> In Myanmar, OOP payments for health services were high in public and private health facilities and accounted for more than 80% of total health expenditures of the country in 2012.<sup>10</sup> Only one study of OOP payments for maternal health care in Myanmar with percentage of catastrophic health expenditures in Myanmar was found<sup>11</sup>; therefore, the evidence on impoverishment and catastrophic payments of ANC and delivery care and their determinants in Myanmar to date is limited.

Different countries have introduced different strategies to reduce financial burdens related to accessing necessary health care during pregnancy, child birth and the postpartum period.<sup>12</sup> Providing free maternal health services has been implemented in some low-income countries, but various studies have found low utilization of these services as well as high maternal mortality and morbidity.<sup>7 13 14</sup> A study in Thailand found improvement of maternal health outcomes five years after the implementation of a universal coverage scheme with health finance reform.<sup>15</sup> Although

1  
2  
3 some countries have begun to offer free health services or health insurance, the achievements in  
4  
5 terms of reducing financial burdens remain limited.<sup>12</sup>  
6

7  
8 Similarly, Myanmar has begun a program providing free essential drugs and health care  
9  
10 for maternal health services in both public facility-based and primary health care settings in  
11  
12 recent years, but OOP payments while accessing these services have been reported.<sup>10 16 17</sup> In  
13  
14 addition, reports on the actual financial burden in terms of impoverishment and catastrophic  
15  
16 expenditure due to OOP payments are limited.<sup>11</sup> Understanding the determinants of financial  
17  
18 burden in utilizing maternal health services is useful to identify the nature of the OOP payment  
19  
20 situation and whether any determinants are modifiable or require policy improvement.<sup>14 18 19</sup> This  
21  
22 study aimed to assess the levels of impoverishment and catastrophic expenditure due to OOP  
23  
24 payments for ANC and delivery care in Yangon Region, Myanmar and explore the determinants  
25  
26 of impoverishment and catastrophic expenditure.  
27  
28  
29

## 30 **Methods**

### 31 ***Study design, participants and sampling method***

32  
33 The study was based on a community-based cross-sectional survey conducted in Yangon Region  
34  
35 of Myanmar during October and November 2016. According to the 2014 census report, Yangon  
36  
37 region had the largest population among the regions of Myanmar.<sup>20</sup> The study recruited women  
38  
39 of reproductive age (15-49 years) with a history of birth within the previous 12 months who were  
40  
41 residents of the study area. Those who had mental retardation or serious illness were excluded.  
42  
43  
44 The required sample size for the first objective was calculated using the one-proportion formula  
45  
46 based on a rate of 9% of pregnant women with catastrophic expenditure due to OOP payments in  
47  
48 utilization of delivery care from a previous study.<sup>11 21</sup> With a precision of 4%, type I error of 1%,  
49  
50 non-response rate of 10% and design effect of 2, at least 750 women were required.  
51  
52  
53  
54  
55  
56  
57  
58  
59  
60



1  
2  
3 Three-stage cluster sampling was used to select eligible persons. For stage one, purposive  
4 selection of two districts among the four districts of Yangon region which covered both urban  
5 and rural populations was done. There were a total of 235 wards and 610 villages in the two  
6 districts. “Wards” and “villages” refer to urban and rural populations, respectively.<sup>22</sup> For stage  
7 two, 16 wards and 16 villages were randomly selected from all of the wards and villages.  
8  
9 Households were selected regarding the number of households and the ratio of urban to rural  
10 population size in the districts considering proportional probability sampling (PPS). For stage  
11 three, we randomly selected women who had delivered within the past 12 months in each  
12 household from selected wards and villages. For households with more than one eligible woman,  
13 one woman was selected randomly.  
14  
15

### 26 ***Involvement of patients and the general public in the study***

27  
28 Women and household members and the public were not involved in the development of the  
29 research questions, in design of the fieldwork or in the recruitment of research assistants. The  
30 results reported in the paper were not disseminated to study participants.  
31  
32

### 35 ***Outcome and independent variables***

36  
37 The main outcome measures were the poverty headcount ratio, normalized poverty gap and  
38 catastrophic expenditure incidence due to OOP payments in the utilization of ANC and delivery  
39 care. OOP payments included the expenses of all related healthcare services received during  
40 ANC and delivery care, namely hospital costs/investigation fees, drugs, consultation fees,  
41 food/living/transportation payments and other costs. The OOP payments were calculated for  
42 ANC and delivery care and then summed as total OOP payments for care. OOP payments for  
43 ANC were counted as the sum of all ANC visits. Impoverishment was defined as a situation  
44 where a household fell below the international poverty line (1.9 US dollars in PPP) after paying  
45  
46  
47  
48  
49  
50  
51  
52  
53  
54  
55  
56  
57  
58  
59  
60

1  
2  
3 for maternal health care services.<sup>23 24</sup> Catastrophic expenditure was defined as OOP payment for  
4 maternal health care services exceeding a threshold of 10% of a household's annual income.<sup>25</sup>  
5  
6

7  
8 Independent variables included background characteristics of the women and their  
9 husbands and household information, accessibility of health services, characteristics of ANC and  
10 delivery care and details of services provided. Household annual income was classified into  $\leq$   
11 1275 USD or  $>1275$  USD according to GDP per capita of Myanmar from the World Bank 2016  
12 data. The household annual incomes were recorded in Myanmar kyats and converted to US\$  
13 using the exchange rate of 1 USD equal to 1362.63 kyats. The information pertaining to  
14 accessibility to health services included availability of a health center, distance as measured in  
15 walking minutes (number of walking minutes from the woman's house to a formal health center)  
16 and types of transportation (women who used any transport to visit a health center).  
17  
18 Characteristics of ANC and delivery care included complications during pregnancy and child  
19 birth and number of ANC visits. Details of services provided included health personnel, place of  
20 care, affordability, and OOP payments.  
21  
22  
23  
24  
25  
26  
27  
28  
29  
30  
31  
32  
33  
34

### 35 ***Data collection***

36  
37 Before the data collection began, 12 research assistants were trained in a two-day training  
38 workshop on how to conduct the interviews and check the information for data completeness.  
39  
40 The lists of women were obtained from the township health departments and local authorities.  
41  
42 The eligible women were visited at their home by the research team at the woman's convenience.  
43  
44 After the study was explained and a consent form signed, the women were interviewed by the  
45 principal investigator and researchers using a pre-tested structured questionnaire in a private area.  
46  
47 Each completed interview was checked promptly for any errors and edited if required. All  
48 questionnaires were reviewed at the end of each day for accuracy of the data obtained.  
49  
50  
51  
52  
53  
54  
55  
56  
57  
58  
59  
60

### *Statistical analysis*

After the data collection was completed, EpiData 3.1 was used to record the data in a double entry system, and R version 3.4.2 was used for data analysis.<sup>26 27</sup>

We considered the maternal health care services from ANC to delivery care and the pre-payment period was counted at one point before utilizing the ANC, thus the pre-payment headcount ratio and normalized poverty gap for ANC and delivery care were the same. Pre-payment and post-payment headcount ratios were measured by the proportion of households having household annual income below the poverty line before and after the women used the ANC and delivery care, respectively. The average of the relative income shortfall of the poor from the poverty line is the normalized poverty gap. A Pen's parade graph between household income as a multiple of the poverty line (y axis) with the cumulative proportion of the population ranked by household income (x axis) was plotted to show the number of non-poor households which became poor after OOP for pregnancy expenses as indicated by the vertical lines below the poverty line. Catastrophic expenditure was measured by the incidence and intensity. Incidence was calculated by the proportion of households who faced catastrophic expenditure due to OOP payments for ANC or delivery care. Intensity was calculated by the proportion of OOP payments for ANC and delivery care exceeding the 10% threshold of the household's annual income.<sup>25 28</sup>

Data on dependent variables (impoverishment and catastrophic expenditures) and on independent variables (the determinants) were collected and analyzed using multiple logistic regression, with sampling weights being applied to adjust for the cluster sampling design. The first-stage adjustment weight was calculated by dividing the total number of wards and villages in each district by the selected number of wards and villages. The second-stage weight was calculated by dividing the total number of women by the selected number of women in each ward and village. The final stage weight was calculated by multiplying the first stage and second stage

1  
2  
3 weights.<sup>29</sup> The adjusted Odds Ratios (OR) and 95% confidence intervals were used for presenting  
4  
5 the final estimates. A p value less than 0.05 was considered to be statistically significant.  
6

## 7 8 **Results**

9  
10 A total of 759 women were included in the study. More than two-thirds of the women lived in an  
11  
12 urban area. Half of the women were aged 24- 35 years and 71% were housewives. More than  
13  
14 two-thirds of their husbands had above primary school level education and 60% of them worked  
15  
16 as daily wage-earners. Most of the households had less than five household members and 89% of  
17  
18 them had an annual household income above 1275 US dollars (USD), and 60.3% of the  
19  
20 households had debt. More than 80% of the women said that a health center was available for  
21  
22 them to get ANC services within 30 minutes walking distance. Only 21.2% of the women had  
23  
24 less than four ANC visits and 15% and 23% of them faced complications during pregnancy and  
25  
26 child birth, respectively (Table 1).  
27  
28  
29

30  
31 Table 2 shows the details of the services used and payments of the women for ANC and  
32  
33 delivery care. More than half (56.4%) met community health personnel for ANC followed by  
34  
35 specialists (22.5%) and doctors/nurses (21.1%). Similar numbers had delivery by community  
36  
37 health personnel (35.4%) or doctors/nurses (35.2%), with the rest by specialists (29.4%). Most of  
38  
39 the women used public facilities for ANC (78%) and delivery care (65%). Almost all of the  
40  
41 women said that they could afford the cost of each ANC visit and half could afford the cost of  
42  
43 delivery care. OOP payments were made by 75% of the women for ANC and by 99.6% for  
44  
45 delivery care. Hospital costs/investigation fees were highest for ANC and delivery care. Cost per  
46  
47 each ANC visit was lower, but the total cost for all ANC visits was higher, than the total cost of  
48  
49 delivery care.  
50  
51  
52

53  
54 Table 3 shows the changes in impoverishment due to OOP payments for ANC and  
55  
56 delivery care. The poverty headcount ratio at pre-payment was 2.4%. The poverty headcount  
57  
58  
59

1  
2  
3 ratio considering the post-payment and pre-payment for women using both ANC and delivery  
4 care showed that poverty increased to 6.1% after service utilization with the decomposition of  
5 4.3% for ANC and 1.3% for delivery care. The increase in the normalized poverty gap showed a  
6 similar trend, with 1.25% for ANC and 0.49% for delivery care services. The individual pre-  
7 payment and post-payment incomes associated with OOP of both ANC and delivery care are  
8 shown in the Pen's parade (Fig 1). Overall, the OOP payments for ANC and delivery care lead to  
9 poverty regardless of household income levels. Table 4 presents the evidence on catastrophic  
10 expenditures due to OOP payments for ANC and delivery care. The incidence for households  
11 incurring catastrophic expenditure due to OOP payments for ANC, delivery care and overall for  
12 ANC and delivery care combined were 12%, 9.1% and 20.9%, respectively. Intensities of  
13 catastrophic expenditures were greater among women using ANC services than for those using  
14 delivery care.

15  
16  
17  
18  
19  
20  
21  
22  
23  
24  
25  
26  
27  
28  
29  
30  
31 The determinants of impoverishment and catastrophic expenditure due to OOP payments  
32 for ANC and delivery care are shown in Table 5. Housewives, women who had lower numbers of  
33 household members, and those who used more ANC services and those who were delivered by  
34 specialists or had ANC at private health facilities were more likely than their counterparts to face  
35 impoverishment and/or catastrophic expenditures due to OOP payments. Women who used  
36 delivery care at private facilities had elevated odds ratios for impoverishment, but notably not for  
37 incurring catastrophic expenditures.

## Discussion

Approximately one in ten women accessing ANC and one-fourth of women delivering a baby in the study area faced impoverishment or catastrophic expenditure due to OOP payments. Women with a higher number of household members or increased use of ANC visits or who accessed specialists or private services were more likely to face impoverishment or catastrophic expenditure.

Even though free maternal healthcare services are nationally available, at least three-fourths of the women incurred OOP payments, which was the same as a previous study in Myanmar conducted in 2015.<sup>11</sup> This finding was also similar to previous studies from India in 2004<sup>18</sup> and Nigeria in 2010<sup>13</sup>, although the maternal health services considered and the methods of OOP measurement were different. Similarly, a study of three African countries where free delivery care was available found that 90% of the women still paid some amount of OOP for their direct medical expenses.<sup>30</sup> A possible explanation might be due to the existence of high informal payments or some expenses not being covered by health insurance.<sup>10 11 13 18 30</sup> The need to turn to OOP payments has been shown to influence the utilization of maternal health services and maternal mortality.<sup>31</sup> Importantly, another study reported that high OOP payments for maternal healthcare also lead households to impoverishment and catastrophic expenditure.<sup>4</sup>

The impoverishment rates in published studies vary depending on the methods used to measure health care expenditures and the poverty line thresholds used for calculating impoverishment. Our study used the international poverty line in 2011 of US\$ 1.9 per day, but a study from Nepal used the international poverty line in 2005 of US\$ 1 per day and reported the poverty headcount ratio of 17% after the use of institutional delivery<sup>8</sup> which was higher than that of our study. In contrast, a study in India used the local poverty line and found higher impoverishment due to maternal health care expenditure than the findings of our study.<sup>32</sup>

1  
2  
3 Although Yangon region is the most developed region in Myanmar, a lot of non-poor households  
4 face impoverishment and deep poverty which could be explained by high maternal healthcare  
5 payments without a compensation scheme.<sup>10 20</sup> Two studies from India using data from 2004 and  
6  
7  
8 2015 found that the poverty headcount ratio for maternal healthcare expenditures declined after  
9  
10  
11  
12 introducing free services for delivery care in 2015.<sup>32 33</sup>

13  
14  
15 Likewise, variations in the incidence of catastrophic expenditure due to maternal health  
16 care expenditures depend on the different maternal services measured, whether household income  
17 or capacity to pay is considered, and the catastrophic expenditure threshold used. One fourth of  
18  
19  
20 women faced catastrophic expenditure due to OOP payments for ANC and delivery care in our  
21  
22  
23 study, which was higher than an earlier study from Myanmar in 2015. This may be because the  
24  
25  
26 previous study measured catastrophic expenditure based only on OOP payments for delivery  
27  
28  
29 care, not ANC, and also only direct and indirect medical costs, not other costs or productivity  
30  
31  
32 loss.<sup>11</sup> Higher incidences of catastrophic expenditure due to OOP payments were reported in  
33  
34  
35 India and Ethiopia because poorer women were included and all ANC, delivery and postnatal  
36  
37  
38 care services were considered.<sup>32 34</sup> Prior studies from Africa and Bangladesh concluded that more  
39  
40  
41 than one third of women faced catastrophic expenditure due to OOP payments for emergency  
42  
43  
44 obstetric care because they were poor and were required to pay for drugs.<sup>35-37</sup>

45  
46  
47 Woman's occupation was associated with impoverishment and catastrophic expenditure  
48  
49  
50 due to OOP payments but a previous study could not identify a direct association between  
51  
52  
53 occupation and impoverishment and catastrophic expenditure. The significant association  
54  
55  
56 between woman's occupation, impoverishment and catastrophic expenditure found in our study,  
57  
58  
59 could be explained by woman's low levels of employment. Lower number of household members  
60  
61  
62 were also associated with the impoverishment and catastrophic expenditure in our study. This  
63  
64  
65 finding was different from a previous study from India<sup>19</sup>, which could be explained by the lower

1  
2  
3 sharing of financial resources among household members of the study participants. The finding  
4  
5 of higher rates of catastrophic expenditures in women with a higher number of ANC visits was  
6  
7 also similar to a study in India which included women with low economic status.<sup>38</sup> Other  
8  
9 previous studies have found that women who used a nearby health center or facilities having  
10  
11 specialists and private facilities for ANC and delivery care where health insurance was not  
12  
13 available were more likely to have impoverishment and catastrophic expenditures.<sup>14 18 19 31 38 39</sup>  
14  
15

16  
17 Only one previous study from Myanmar in rural areas of a township in Ayeyarwaddy  
18  
19 region measured catastrophic health expenditures resulting from maternal health care.<sup>11</sup> Our  
20  
21 study included both rural and urban areas of Yangon region, and provides important information  
22  
23 on these factors for policy makers to help them consider financial burdens leading to  
24  
25 impoverishment or catastrophic expenditures.  
26  
27

28  
29 The study had some limitations. First, this was a cross sectional study, thus the causal  
30  
31 relationship between the determinants and level of impoverishment and catastrophic expenditures  
32  
33 due to OOP payments for ANC and delivery care could not be firmly identified. Second,  
34  
35 household annual income and payments for healthcare services were self-reported, therefore there  
36  
37 may have been over- or under-reporting. Third, the payment of total ANC used the payment of  
38  
39 last ANC visit and then multiplied by the total number of all visits. Fourth, recall bias might have  
40  
41 occurred due to data gathering through retrospective interviews. However, we included only  
42  
43 women within 12 months of delivery to minimize the recall bias. Finally, the socioeconomic  
44  
45 status of the people in the Yangon region is better than in other regions; therefore, the findings of  
46  
47 this study are not likely representative of the entire country.  
48  
49  
50  
51  
52  
53  
54  
55  
56  
57  
58  
59  
60



## Conclusions

High OOP payments for utilization of ANC and delivery care in the Yangon region of Myanmar resulted in one-tenth of the women becoming impoverished and one-fourth suffering a catastrophic expenditure. Women with few household members, or with a large number of ANC visits, or who had been attended by specialists or had used private services were more likely than other women to face impoverishment or catastrophic expenditures.

## Acknowledgements

This study was a part of a doctoral thesis in Epidemiology of the first author at Prince of Songkla University in Thailand. We would like to thank the Ministry of Health and Sports and Regional Department of Yangon for their permission and support during the data collection phase of this work.

## Contributors

All authors contributed to the concept and design of the study. ANMM and TL participated in data collection, data analysis, interpretation of the data, and preparation of the draft manuscript. TTH, MMW, JS and EB also assisted with interpretation of the data and commented on the draft MS. All authors read and approved the final manuscript.

## Competing interests

None declared.

## Funding

Thanks to the Norwegian Agency for Development Cooperation (Norad) for funding the project 'Health and Sustainable Development in Myanmar – Competence building in public health and medical research and education, MY-NORTH', through the NORHED-programme: Norad: 1300650, MMR-13/0049 NORHED, UiO: 211782.

### **Ethical approval**

Ethical clearances for the study were obtained from the Ethics Review Committee of Prince of Songkla University, Thailand, the Department of Medical Research, Myanmar and the Norwegian National Research Ethics Committee (NSD), Norway.

### **Data sharing statement**

No additional data available. Original data without identity can be provided on request after the Ethics Review Committee of Prince of Songkla University is informed and provides their approval.

## References

1. WHO. *WHO fact sheet on maternal mortality*. Geneva: World Health Organization, 2016.
2. WHO. *Health in 2015: from MDGs, millennium development goals to SDGs, sustainable development goals*. Geneva: World Health Organization, 2015.
3. UNICEF. *Monitoring and situation of children and women*. New York: United Nations International Children's Emergency Fund, 2015.
4. Saksena P, Hsu J, Evans DB. Financial risk protection and universal health coverage: evidence and measurement challenges. *PLoS Med* 2014;11(9):e1001701.
5. WHO, World Bank. *Tracking universal health coverage*. Geneva: World Health Organization, 2015.
6. Skordis-Worrall J, Pace N, Bapat U, et al. Maternal and neonatal health expenditure in Mumbai slums (India): a cross sectional study. *BMC Public Health* 2011;11:150.
7. Dalaba MA, Akweongo P, Aborigo RA, et al. Cost to households in treating maternal complications in northern Ghana: a cross-sectional study. *BMC Health Servs Res* 2015;15:34.
8. Gartoulla P, Liabsuetrakul T, Chongsuvivatwong V, et al. Ability to pay and impoverishment among women who give birth at a university hospital in Kathmandu, Nepal. *Glob Public Health* 2012;7(10):1145-56.
9. Rahman M, Rob U, Noor FR, et al. Out-of-pocket expenses for maternity care in rural Bangladesh: a public-private comparison. *Int Q Community Health Educ* 2012;33(2):143-57.
10. World Bank. *Myanmar: public expenditure review 2015*. Washington D.C: World Bank, 2015.

- 1  
2  
3 11. Han WW, Saw S, Einda HMT, et al. Out of pocket expenditure on maternal and child health  
4  
5 care services among rural households in Dedaye township, Myanmar. *Myanmar Med J*  
6  
7 2017;59(2):37-49.  
8  
9
- 10 12. Borghi J, Ensor T, Somanathan A, et al. Mobilising financial resources for maternal health.  
11  
12 *Lancet* 2006;368:1457-65.  
13
- 14 13. Kalu-Umeh NN, Sambo MN, Idris SH, et al. Costs and patterns of financing maternal health  
15  
16 care services in rural communities in northern Nigeria: evidence for designing national  
17  
18 fee exemption policy. *Int J MCH AIDS* 2013;2(1):163-72.  
19  
20
- 21 14. Goli S, Moradvaj, Rammohan A, et al. High spending on maternity care in India: what are  
22  
23 the factors explaining it? *PloS One* 2016;11(6): e0156437.  
24  
25
- 26 15. Limwattananon S, Tangcharoensathien V, Prakongsai P. Equity in maternal and child health  
27  
28 in Thailand. *Bull World Health Organ* 2010;88(6):420-7.  
29  
30
- 31 16. Latt NN, Cho SM, Htun NMM, et al. Healthcare in Myanmar. *Nagoya J Med Sci* 2016;78(2):  
32  
33 123-34.  
34
- 35 17. Myanmar Ministry of Health and Sports. *Myanmar national health plan 2017 - 2021*. Nay Pyi  
36  
37 Taw: Ministry of Health and Sports, 2016.  
38  
39
- 40 18. Kerketta S. Out of pocket expenditure on utilization of ante-natal and delivery care services in  
41  
42 India: analysis based on NSSO 60th round. *Int J Reprod Contracept Obstet Gynecol*  
43  
44 2015;4(6):1704-09.  
45  
46
- 47 19. Leone T, James KS, Padmadas SS. The burden of maternal health care expenditure in India:  
48  
49 multilevel analysis of national data. *Matern Child Health J* 2013;17(9):1622-30.  
50
- 51 20. Myanmar Ministry of Immigration and Population. *Yangon region census report*. Nay Pyi  
52  
53 Taw: Ministry of Immigration and Population, 2014.  
54  
55  
56  
57  
58  
59  
60

- 1  
2  
3 21. WHO. *Sample size determination in health studies, a practical manual*. Geneva: World  
4  
5 Health Organization, 1991.  
6
- 7 22. Myanmar Ministry of Home Affairs. *Myanmar administrative structure*. Nay Pyi Taw:  
8  
9 Ministry of Home Affairs, 2012.  
10
- 11 23. WHO. *Distribution of health payments and catastrophic expenditures methodology*. Geneva:  
12  
13 World Health Organization, 2005.  
14
- 15 24. World Bank. *Country poverty brief, Myanmar*. Washington D.C: World Bank, 2017.  
16
- 17 25. O'Donnell O, Doorslaer Ev, Wagstaff A, et al. *Analyzing health equity using household*  
18  
19 *survey data: a guide to techniques and their implementation*. Washington, D.C: World  
20  
21 Bank, 2008.  
22  
23  
24
- 25 26. R: a language and environment for statistical computing. R foundation for statistical  
26  
27 computing. 1.0.153 version. Vienna, Austria, 2015.  
28
- 29 27. EpiData entry. 3.1 version. Odense, Denmark, 2005.  
30
- 31 28. Wagstaff A, Doorslaer Ev. Catastrophe and impoverishment in paying for health care: with  
32  
33 applications to Vietnam 1993-1998. *Health Econ* 2003;12(11):921–34.  
34  
35
- 36 29. Lumley T. *Complex sampling and R*. A John Wiley & Sons, Inc., Washington D.C, 2009.  
37
- 38 30. Perkins M, Brazier E, Themmen E, et al. Out-of-pocket costs for facility-based maternity care  
39  
40 in three African countries. *Health Policy Plan* 2009;24(4):289-300.  
41  
42  
43
- 44 31. Mohanty SK, Kastor A. Out-of-pocket expenditure and catastrophic health spending on  
45  
46 maternal care in public and private health centres in India: a comparative study of pre-  
47  
48 and post-national health mission period. *Health Econ Rev* 2017;7(1):31.  
49
- 50 32. Mukherjee S, Singh A, Chandra R. Maternity or catastrophe: a study of household  
51  
52 expenditure on maternal health care in India. *Health* 2013;5(1):109-18.  
53  
54  
55  
56  
57  
58  
59  
60

- 1  
2  
3 33. Prinja S, Bahuguna P, Gupta R, et al. Coverage and financial risk protection for institutional  
4  
5 delivery: how universal is provision of maternal health care in India? *PloS One*  
6  
7 2015;10(9):e0137315.  
8  
9  
10 34. Akalu T, Guda A, Tamiru M, et al. Examining out of pocket payments for maternal health in  
11  
12 rural Ethiopia: paradox of free health care un-affordability. *Ethiop J Health Dev*  
13  
14 2012;26(1):251-57.  
15  
16  
17 35. Shukla M, Kumar A, Agarwal M, et al. Out-of-pocket expenditure on institutional delivery in  
18  
19 rural Lucknow. *Indian J Comm Health* 2015;27(2):241-246.  
20  
21  
22 36. Honda A, Randaoharison PG, Matsui M. Affordability of emergency obstetric and neonatal  
23  
24 care at public hospitals in Madagascar. *Reprod Health Matters* 2017;19(37):10-20.  
25  
26  
27 37. Hoque ME, Dasgupta SK, Naznin E, et al. Household coping strategies for delivery and  
28  
29 related healthcare cost: findings from rural Bangladesh. *Trop Med Int Health*  
30  
31 2015;20(10):1368-75.  
32  
33 38. Goli S, Rammohan A, Moradhvaj. Out-of-pocket expenditure on maternity care for hospital  
34  
35 births in uttar pradesh, India. *Health Econ Rev* 2018;8(1):5.  
36  
37  
38 39. Bonu S, Bhushan I, Rani M, et al. Incidence and correlates of 'catastrophic' maternal health  
39  
40 care expenditure in India. *Health Policy Plan* 2009;24(6):445-56.  
41  
42  
43  
44  
45  
46  
47  
48  
49  
50  
51  
52  
53  
54  
55  
56  
57  
58  
59  
60

## List of Tables and Figures

Table 1. Background characteristics of women and their husbands, household information, accessibility of health services and characteristics of ANC and delivery care (n=759)

Table 2. Details of services used and payments of the women for ANC and delivery care (n=759)

Table 3. Impoverishment due to OOP payments for ANC and delivery care (n=757)

Figure 1. Pen's parade of pre- and post-payment income of overall antenatal and delivery care

Legend

— Pre-payment income      — Post-payment income  
- - - - - Income-based poverty line

Table 4. Catastrophic expenditures due to OOP payments for ANC and delivery care (n=757)

Table 5. Determinants of impoverishment and catastrophic expenditures due to OOP payments (n=757)

Table 1. Background characteristics of women and their husbands, household information, accessibility of health services and characteristics of ANC and delivery care (n=759)

| Characteristic                          | n (%)      |
|-----------------------------------------|------------|
| <b>Women's characteristics</b>          |            |
| Place of residence                      |            |
| Urban                                   | 542 (72.4) |
| Rural                                   | 217 (28.6) |
| Age                                     |            |
| 15-24 years                             | 215 (28.3) |
| 25-34 years                             | 376 (49.5) |
| 35-49 years                             | 168 (22.1) |
| Occupation                              |            |
| Housework                               | 539 (71)   |
| Any job                                 | 220 (29)   |
| <b>Husbands' characteristics</b>        |            |
| Education                               |            |
| Primary school and lower                | 242 (31.9) |
| More than primary school                | 517 (68.1) |
| Occupation                              |            |
| Daily wage earner                       | 455 (59.9) |
| Other                                   | 304 (40.1) |
| <b>Household characteristics</b>        |            |
| Number of household members             |            |
| > 5 members                             | 276 (38.4) |
| 3-5 members                             | 483 (63.6) |
| Household annual income                 |            |
| ≤ 1275 USD                              | 83 (10.9)  |
| > 1275 USD                              | 676 (89.1) |
| Household debt                          |            |
| No                                      | 301 (39.7) |
| Yes                                     | 458 (60.3) |
| <b>Accessibility of health services</b> |            |
| Availability of health center           |            |
| No                                      | 123 (16.2) |
| Yes                                     | 636 (83.8) |
| Walking distance in minutes             |            |
| > 30 minutes                            | 76 (10)    |
| ≤ 30 minutes                            | 683 (90)   |
| Type of transportation                  |            |
| Car                                     | 79 (10.4)  |
| Motorcycle                              | 172 (22.7) |



|                                                 |            |
|-------------------------------------------------|------------|
| Walking                                         | 406 (53.3) |
| Other                                           | 102 (13.4) |
| <b>Characteristics of ANC and delivery care</b> |            |
| Number of ANC visits                            |            |
| 1-3                                             | 161 (21.2) |
| 4-6                                             | 262 (34.5) |
| > 6                                             | 336 (44.3) |
| Complication during pregnancy                   |            |
| No                                              | 645 (85.0) |
| Yes                                             | 114 (15.0) |
| Complication during birth                       |            |
| No                                              | 584 (76.9) |
| Yes                                             | 175 (23.1) |

---

Table 2. Details of services used and payments of the women for ANC and delivery care (n=759)

|                                                                  | <b>Antenatal care</b> | <b>Delivery care</b> |
|------------------------------------------------------------------|-----------------------|----------------------|
|                                                                  | <b>n (%)</b>          | <b>n (%)</b>         |
| <b>Health personnel</b>                                          |                       |                      |
| Community health personnel                                       | 428 (56.4)            | 269 (35.4)           |
| Specialists                                                      | 171 (22.5)            | 223 (29.4)           |
| Doctors/Nurses                                                   | 160 (21.1)            | 267 (35.2)           |
| <b>Place of care</b>                                             |                       |                      |
| Public facilities                                                | 592 (78)              | 493 (65)             |
| Private facilities                                               | 167 (22)              | 266 (35)             |
| <b>Affordability (per visit/delivery)</b>                        |                       |                      |
| No                                                               | 26 (3.4)              | 338 (44.5)           |
| Yes                                                              | 733 (96.6)            | 421 (55.5)           |
| <b>Out-of-pocket payments</b>                                    |                       |                      |
| No                                                               | 186 (24.5)            | 3 (0.4)              |
| Yes                                                              | 573 (75.5)            | 756 (99.6)           |
|                                                                  | <b>(n=573)</b>        | <b>(n=756)</b>       |
| <b>Total costs of care</b>                                       | 31.7 (0-12072.2)      | 84.4 (0-2305.1)      |
| <b>Total out-of-pocket payments of care</b>                      | 31.7 (0-10633.8)      | 73.4 (0-1541.1)      |
| <b>Categories of out-of-pocket payments (per visit/delivery)</b> |                       |                      |
| Hospital cost/Investigation fees                                 | 0.73 (0-80.8)         | 7.34 (0-1247.6)      |
| Drugs                                                            | 0 (0-40.4)            | 0 (0-587.1)          |
| Consultation fees                                                | 0 (0-23.9)            | 0 (0-440.3)          |
| Food/Travel/Living cost                                          | 0.57 (0-73.4)         | 2.94 (0-1027.4)      |
| Other expenses                                                   | 0 (0-29.4)            | 0 (0-220.2)          |
| Sum of costs                                                     | 4.8 (0-759.6)         | 73.4 (0-1541.1)      |

Table 3. Impoverishment due to OOP payments for ANC and delivery care (n=757)

| Impoverishment due to OOP payments (%) |                                                |                  |                |                  |               |                  |                                        |  |
|----------------------------------------|------------------------------------------------|------------------|----------------|------------------|---------------|------------------|----------------------------------------|--|
|                                        | Before<br>utilizing ANC<br>or delivery<br>care |                  | Antenatal care |                  | Delivery care |                  | Overall antenatal and<br>delivery care |  |
|                                        | Pre-payment                                    | Post-<br>payment | Change         | Post-<br>payment | Change        | Post-<br>payment | Change                                 |  |
| Poverty<br>headcount<br>ratio          | 2.4                                            | 6.7              | 4.3            | 3.7              | 1.3           | 8.5              | 6.1                                    |  |
| Normalized<br>poverty gap              | 0.01                                           | 1.26             | 1.25           | 0.50             | 0.49          | 1.40             | 1.39                                   |  |

Table 4. Catastrophic expenditures due to OOP payments for ANC and delivery care (n=757)

| <b>Catastrophic expenditures<br/>due to OOP payments</b> | <b>Antenatal care</b> | <b>Delivery care</b> | <b>Overall antenatal and<br/>delivery care</b> |
|----------------------------------------------------------|-----------------------|----------------------|------------------------------------------------|
| Incidence (%)                                            | 12.0                  | 9.1                  | 20.9                                           |
| Intensity (%)                                            | 6.1                   | 1.7                  | 9.2                                            |

For peer review only

Table 5. Determinants of impoverishment and catastrophic expenditure due to OOP payments for overall ANC and delivery care (n=757)

| Characteristic                            | Impoverishment<br>Adjusted OR (95% CI) | Catastrophic expenditure<br>Adjusted OR (95% CI) |
|-------------------------------------------|----------------------------------------|--------------------------------------------------|
| <b>Woman's occupation</b>                 |                                        |                                                  |
| Other (ref.)                              | 1                                      | 1                                                |
| Housewife                                 | 4.81 (1.91-12.12)***                   | 2.18 (1.16-4.10)*                                |
| <b>Number of household members</b>        |                                        |                                                  |
| > 5 (ref.)                                | 1                                      | 1                                                |
| 3-5                                       | 7.13 (2.77-18.33)***                   | 7.82 (4.41-13.89)***                             |
| <b>Number of ANC visits</b>               |                                        |                                                  |
| 1-3 (ref.)                                | 1                                      | 1                                                |
| 4-6                                       | 1.26 (0.35-4.52)                       | 2.06 (0.99-4.31)                                 |
| > 6                                       | 5.73 (1.90-17.26)**                    | 5.63(2.96-10.70)***                              |
| <b>Health personnel for delivery care</b> |                                        |                                                  |
| Community health personnel (ref.)         | 1                                      | 1                                                |
| Specialists                               | 2.97 (1.14-7.76)*                      | 4.83 (2.24-10.44)***                             |
| Doctors/Nurses                            | 2.22 (0.78-6.33)                       | 3.45 (1.64-7.27)**                               |
| <b>Place of antenatal care</b>            |                                        |                                                  |
| Public facilities (ref.)                  | 1                                      | 1                                                |
| Private facilities                        | 2.46 (1.14-5.32)*                      | 2.42 (1.40-4.17)**                               |
| <b>Place of delivery care</b>             |                                        |                                                  |
| Public facilities (ref.)                  | 1                                      |                                                  |
| Private facilities                        | 3.29 (1.41-7.70)**                     |                                                  |

p < 0.05 \*, p < 0.01 \*\*, p < 0.001 \*\*\*, OR: Odds Ratio, CI: Confidence Interval

1  
2  
3  
4  
5  
6  
7  
8  
9  
10  
11  
12  
13  
14  
15  
16  
17  
18  
19  
20  
21  
22  
23  
24  
25  
26  
27  
28  
29  
30  
31  
32  
33  
34  
35  
36  
37  
38  
39  
40  
41  
42  
43  
44  
45  
46  
47  
48  
49  
50  
51  
52  
53  
54  
55  
56  
57  
58  
59  
60

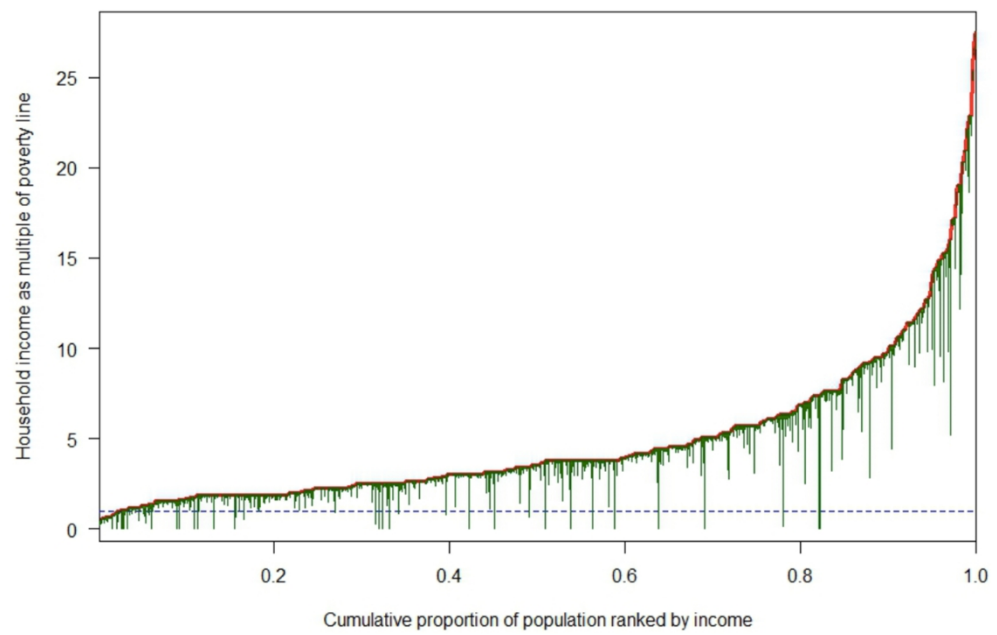

Figure 1

83x53mm (600 x 600 DPI)

**STROBE 2007 (v4) Statement—Checklist of items that should be included in reports of *cross-sectional studies***

| Section/Topic                | Item # | Recommendation                                                                                                                                                                       | Reported on page # |
|------------------------------|--------|--------------------------------------------------------------------------------------------------------------------------------------------------------------------------------------|--------------------|
| <b>Title and abstract</b>    | 1      | (a) Indicate the study's design with a commonly used term in the title or the abstract                                                                                               | 1-2                |
|                              |        | (b) Provide in the abstract an informative and balanced summary of what was done and what was found                                                                                  | 2                  |
| <b>Introduction</b>          |        |                                                                                                                                                                                      |                    |
| Background/rationale         | 2      | Explain the scientific background and rationale for the investigation being reported                                                                                                 | 4-5                |
| Objectives                   | 3      | State specific objectives, including any prespecified hypotheses                                                                                                                     | 5                  |
| <b>Methods</b>               |        |                                                                                                                                                                                      |                    |
| Study design                 | 4      | Present key elements of study design early in the paper                                                                                                                              | 5                  |
| Setting                      | 5      | Describe the setting, locations, and relevant dates, including periods of recruitment, exposure, follow-up, and data collection                                                      | 5-7                |
| Participants                 | 6      | (a) Give the eligibility criteria, and the sources and methods of selection of participants                                                                                          | 5                  |
| Variables                    | 7      | Clearly define all outcomes, exposures, predictors, potential confounders, and effect modifiers. Give diagnostic criteria, if applicable                                             | 6-7                |
| Data sources/<br>measurement | 8*     | For each variable of interest, give sources of data and details of methods of assessment (measurement). Describe comparability of assessment methods if there is more than one group | 6-8                |
| Bias                         | 9      | Describe any efforts to address potential sources of bias                                                                                                                            | 6-7                |
| Study size                   | 10     | Explain how the study size was arrived at                                                                                                                                            | 5                  |
| Quantitative variables       | 11     | Explain how quantitative variables were handled in the analyses. If applicable, describe which groupings were chosen and why                                                         | 7-9                |
| Statistical methods          | 12     | (a) Describe all statistical methods, including those used to control for confounding                                                                                                | 8-9                |
|                              |        | (b) Describe any methods used to examine subgroups and interactions                                                                                                                  | N/A                |
|                              |        | (c) Explain how missing data were addressed                                                                                                                                          | N/A                |
|                              |        | (d) If applicable, describe analytical methods taking account of sampling strategy                                                                                                   | 8-9                |
|                              |        | (e) Describe any sensitivity analyses                                                                                                                                                | N/A                |

|                          |     |                                                                                                                                                                                                              |       |
|--------------------------|-----|--------------------------------------------------------------------------------------------------------------------------------------------------------------------------------------------------------------|-------|
| <b>Results</b>           |     |                                                                                                                                                                                                              |       |
| Participants             | 13* | (a) Report numbers of individuals at each stage of study—eg numbers potentially eligible, examined for eligibility, confirmed eligible, included in the study, completing follow-up, and analysed            | 9     |
|                          |     | (b) Give reasons for non-participation at each stage                                                                                                                                                         | N/A   |
|                          |     | (c) Consider use of a flow diagram                                                                                                                                                                           | N/A   |
| Descriptive data         | 14* | (a) Give characteristics of study participants (eg demographic, clinical, social) and information on exposures and potential confounders                                                                     | 10    |
|                          |     | (b) Indicate number of participants with missing data for each variable of interest                                                                                                                          | N/A   |
| Outcome data             | 15* | Report numbers of outcome events or summary measures                                                                                                                                                         | 9-10  |
| Main results             | 16  | (a) Give unadjusted estimates and, if applicable, confounder-adjusted estimates and their precision (eg, 95% confidence interval). Make clear which confounders were adjusted for and why they were included | 10    |
|                          |     | (b) Report category boundaries when continuous variables were categorized                                                                                                                                    | 9-10  |
|                          |     | (c) If relevant, consider translating estimates of relative risk into absolute risk for a meaningful time period                                                                                             | N/A   |
| Other analyses           | 17  | Report other analyses done—eg analyses of subgroups and interactions, and sensitivity analyses                                                                                                               | N/A   |
| <b>Discussion</b>        |     |                                                                                                                                                                                                              |       |
| Key results              | 18  | Summarise key results with reference to study objectives                                                                                                                                                     | 11    |
| Limitations              | 19  | Discuss limitations of the study, taking into account sources of potential bias or imprecision. Discuss both direction and magnitude of any potential bias                                                   | 13    |
| Interpretation           | 20  | Give a cautious overall interpretation of results considering objectives, limitations, multiplicity of analyses, results from similar studies, and other relevant evidence                                   | 11-13 |
| Generalisability         | 21  | Discuss the generalisability (external validity) of the study results                                                                                                                                        | 13    |
| <b>Other information</b> |     |                                                                                                                                                                                                              |       |
| Funding                  | 22  | Give the source of funding and the role of the funders for the present study and, if applicable, for the original study on which the present article is based                                                | 14    |

\*Give information separately for cases and controls in case-control studies and, if applicable, for exposed and unexposed groups in cohort and cross-sectional studies.

**Note:** An Explanation and Elaboration article discusses each checklist item and gives methodological background and published examples of transparent reporting. The STROBE checklist is best used in conjunction with this article (freely available on the Web sites of PLoS Medicine at <http://www.plosmedicine.org/>, Annals of Internal Medicine at <http://www.annals.org/>, and Epidemiology at <http://www.epidem.com/>). Information on the STROBE Initiative is available at [www.strobe-statement.org](http://www.strobe-statement.org).
